# Supplementary material
Source: PubMed Central journal article supplement (PMC7343396)
Supplement: NIHMS1602156-supplement-Supplementary_Materials.pdf [file NIHMS1602156-supplement-Supplementary_Materials.pdf]

# Supplementary Materials for

## Computational design of a modular protein sense/response system

### Authors:

Anum A. Glasgow<sup>†1</sup>, Yao-Ming Huang<sup>†1,8</sup>, Daniel J. Mandell<sup>†1,2,9</sup>, Michael Thompson<sup>1</sup>, Ryan Ritterson<sup>1,10</sup>, Amanda L. Loshbaugh<sup>1,3</sup>, Jenna Pellegrino<sup>1,3</sup>, Cody Krivacic<sup>1,4</sup>, Roland A. Pache<sup>1,11</sup>, Kyle A. Barlow<sup>1,2,12</sup>, Noah Ollikainen<sup>1,2</sup>, Deborah Jeon<sup>1</sup>, Mark J. S. Kelly<sup>5</sup>, James S. Fraser<sup>1,3,6</sup>, Tanja Kortemme<sup>\*1,2,3,4,6,7</sup>.

Correspondence to: [tanjakortemme@gmail.com](mailto:tanjakortemme@gmail.com)

### This file includes:

Materials and Methods  
Supplementary Text  
Tables S1 to S4  
Figs. S1 to S14  
Appendices 1-4

## Supplementary Tables

- Table S1:** Summary of computational designs.
- Table S2:** Computationally designed library.
- Table S3:** Single-site saturation mutagenesis positions and results.
- Table S4:** X-ray data reduction and model refinement.

## Supplementary Figures

- Figure S1:** Sequence alignments of designed proteins (Table S1).
  - Figure S2:** Growth +/- 5 mM mevalonate and change in growth for data shown in Figure 2C.
  - Figure S3:** Example data from library screening using a colony-printing assay.
  - Figure S4:** Sequence alignments of hits from the computationally designed S3 library.
  - Figure S5:** Sequence alignments of hits from the error-prone PCR S3 library.
  - Figure S6:** Data from the single-site saturation mutagenesis screen.
  - Figure S7:** Dependency of the sensor signal on IPTG and mevalonate concentrations.
  - Figure S8:** Growth +/- mevalonate and change in growth for design S3-2D.
  - Figure S9:** BLI binding assay representative data and fits.
  - Figure S10:** Electron density maps supporting placement of the FPP ligand.
  - Figure S11:** Electron density supporting ligand-induced rearrangement of the FPP binding site.
  - Figure S12:** Comparison of S3-2D and S3-3A (with Y197A mutation) in the split mDHFR assay.
  - Figure S13:** BLI binding data +/- FPP for designs S3-2D, S3-3A, S3-3B, S3-3C.
  - Figure S14:** TxTI data for S3-2D sensor
- 
- Appendix 1:** Plasmids / constructs for split mDHFR reporter assay.
  - Appendix 2:** Plasmids / constructs for *in vitro* binding experiments and crystallography.
  - Appendix 3:** Plasmids / constructs for TxTI reporter assay.
  - Appendix 4:** Gene and vector DNA sequences.

## Materials and Methods

### 1. Computational design methods

Computational methods that resulted in the successful sensor design for scaffold 3 (AR-MBP) are as described in detail first(38). Differences in the design protocol that resulted in designs for scaffold 1 (FKBP12-FRB) and scaffold 2 (RapF-ComA) are described further below.

1.1 Selection of protein-protein interface scaffold set. To identify protein interface scaffolds suitable for accommodating small molecule binding sites, we searched the PDB for heterodimeric complexes with  $\leq 95\%$  sequence identity solved at  $\leq 2.8$  Å resolution between chains of 75 to 300 residues that were expressed in *E. coli*. This search resulted in 612 structures (an expanded search of the PDB resulted in up to 3462 scaffolds, see section 1.7) that were filtered to remove HETATM records and multiple densities (only the first densities listed were kept). Selenomethionines were converted to methionines.

1.2 Definition of FPP binding site geometries. We identified 29 X-ray structures of FPP–protein complexes at  $\leq 2.8$  Å resolution in the PDB to serve as templates for binding site geometries. We visually inspected each protein-FPP complex to identify cases where 4 residues could define an encompassing portion of the FPP binding surface. 18 structures were discarded because FPP bound in complex with an inhibitor or other small molecule, forming a binding site that cannot easily be reproduced by amino acid side-chains. Other cases were discarded because the binding site was formed by small contributions from too many residues to define a suitable binding site geometry. Ultimately, 4 template binding site geometries (“motifs”) were selected for subsequent matching

and design (a fifth distinct binding site geometry derived from 3bnx is used in the runs leading to designs on scaffold 2, see section 1.7):

| PDB  | Protein                                              | Motif residues                                  |
|------|------------------------------------------------------|-------------------------------------------------|
| 1kzo | Protein farnesyltransferase                          | chain B: R291, Y251, W303.<br>chain C: I10.     |
| 1t0a | 2C-Methyl-D-Erythritol-2,4-cyclodiphosphate Synthase | chain A: I101, F9.<br>chain B: F9. chain C: F9. |
| 3bnx | Aristolochene synthase                               | chain A: R314, W308, L184, F153.                |
| 3dpy | Protein farnesyltransferase                          | chain B: R291, Y251, W303.<br>chain C: I2008.   |

Note that for PDB templates 1kzo and 3dpy, one of the motif residues comes from a co-associated peptide substrate, and the binding site geometry from 1t0a contains residues from a homotrimeric interface. In all cases non-polar hydrogens were added to FPP, and a single polar hydrogen was placed on the O5 oxygen.

The dihedral angles for the conformations of FPP used in the template binding site geometries, with PDB codes, are included below:

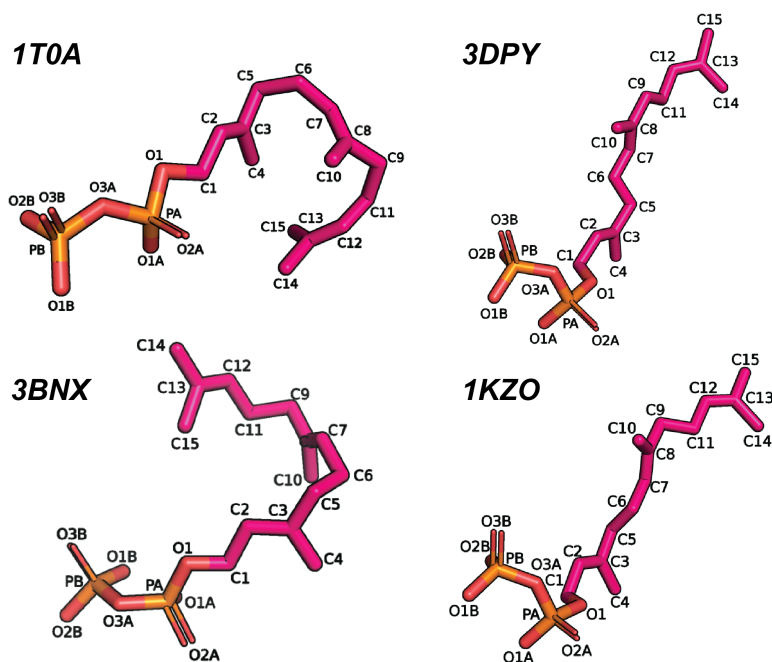

**1KZO**

| Index | Atom 1 | Atom 2 | Atom 3 | Atom 4 | Angle    |
|-------|--------|--------|--------|--------|----------|
| 1     | O1B    | PB     | O3A    | PA     | 56.578   |
| 2     | O2B    | PB     | O3A    | PA     | -66.439  |
| 3     | O3B    | PB     | O3A    | PA     | 179.393  |
| 4     | PB     | O3A    | PA     | O1A    | -9.683   |
| 5     | PB     | O3A    | PA     | O2A    | -132.538 |
| 6     | O3A    | PA     | O1A    | O2A    | -119.396 |
| 7     | O3A    | PA     | O1     | C1     | -82.579  |
| 8     | PA     | O1     | C1     | C2     | 129.629  |
| 9     | O1     | C1     | C2     | C3     | 108.359  |
| 10    | C1     | C2     | C3     | C4     | -0.25    |
| 11    | C2     | C3     | C5     | C6     | 66.367   |
| 12    | C4     | C3     | C5     | C6     | -113.68  |
| 13    | C3     | C5     | C6     | C7     | 173.344  |
| 14    | C5     | C6     | C7     | C8     | 141.175  |
| 15    | C6     | C7     | C8     | C10    | 0        |
| 16    | C6     | C7     | C8     | C9     | 179.895  |
| 17    | C7     | C8     | C9     | C11    | -59.234  |
| 18    | C8     | C9     | C11    | C12    | -174.743 |
| 19    | C10    | C8     | C9     | C11    | 120.679  |
| 20    | C9     | C11    | C12    | C13    | 177.13   |
| 21    | C11    | C12    | C13    | C14    | -0.082   |
| 22    | C11    | C12    | C13    | C15    | 179.929  |

**1T0A**

| Index | Atom 1 | Atom 2 | Atom 3 | Atom 4 | Angle    |
|-------|--------|--------|--------|--------|----------|
| 1     | O1B    | PB     | O3A    | PA     | -0.78    |
| 2     | O2B    | PB     | O3A    | PA     | -124.633 |
| 3     | O3B    | PB     | O3A    | PA     | 121.527  |
| 4     | PB     | O3A    | PA     | O2A    | -69.47   |
| 5     | PB     | O3A    | PA     | O1A    | 60.816   |
| 6     | O3A    | PA     | O1A    | O2A    | -130.509 |
| 7     | O3A    | PA     | O1     | C1     | -170.861 |
| 8     | PA     | O1     | C1     | C2     | -170.407 |
| 9     | O1     | C1     | C2     | C3     | -152.506 |
| 10    | C1     | C2     | C3     | C4     | 1.032    |
| 11    | C2     | C3     | C5     | C6     | 84.311   |
| 12    | C4     | C3     | C5     | C6     | -95.668  |
| 13    | C3     | C5     | C6     | C7     | 67.587   |
| 14    | C5     | C6     | C7     | C8     | -102.897 |
| 15    | C6     | C7     | C8     | C10    | 1.709    |
| 16    | C6     | C7     | C8     | C9     | -176.548 |
| 17    | C7     | C8     | C9     | C11    | -102.331 |
| 18    | C8     | C9     | C11    | C12    | -46.225  |
| 19    | C10    | C8     | C9     | C11    | 79.292   |

|    |     |     |     |     |          |
|----|-----|-----|-----|-----|----------|
| 20 | C9  | C11 | C12 | C13 | 131.953  |
| 21 | C11 | C12 | C13 | C14 | -179.556 |
| 22 | C11 | C12 | C13 | C15 | 0.225    |

### 3BNX

| Index | Atom 1 | Atom 2 | Atom 3 | Atom 4 | Angle    |
|-------|--------|--------|--------|--------|----------|
| 1     | O1B    | PB     | O3A    | PA     | 3.718    |
| 2     | O2B    | PB     | O3A    | PA     | 123.804  |
| 3     | O3B    | PB     | O3A    | PA     | -116.979 |
| 4     | PB     | O3A    | PA     | O2A    | -142.881 |
| 5     | PB     | O3A    | PA     | O1A    | -23.229  |
| 6     | O3A    | PA     | O1A    | O2A    | -119.484 |
| 7     | O3A    | PA     | O1     | C1     | 179.743  |
| 8     | PA     | O1     | C1     | C2     | -178.706 |
| 9     | O1     | C1     | C2     | C3     | 160.066  |
| 10    | C1     | C2     | C3     | C4     | 0.771    |
| 11    | C2     | C3     | C5     | C6     | -121.614 |
| 12    | C4     | C3     | C5     | C6     | 58.834   |
| 13    | C3     | C5     | C6     | C7     | 102.037  |
| 14    | C5     | C6     | C7     | C8     | -110.856 |
| 15    | C6     | C7     | C8     | C10    | -0.052   |
| 16    | C6     | C7     | C8     | C9     | 179.905  |
| 17    | C7     | C8     | C9     | C11    | -106.179 |
| 18    | C8     | C9     | C11    | C12    | 126.417  |
| 19    | C10    | C8     | C9     | C11    | 73.778   |
| 20    | C9     | C11    | C12    | C13    | -132.226 |
| 21    | C11    | C12    | C13    | C14    | -179.476 |
| 22    | C11    | C12    | C13    | C15    | 0.214    |

### 3DPY

| Index | Atom 1 | Atom 2 | Atom 3 | Atom 4 | Angle    |
|-------|--------|--------|--------|--------|----------|
| 1     | O1B    | PB     | O3A    | PA     | 51.274   |
| 2     | O2B    | PB     | O3A    | PA     | -68.156  |
| 3     | O3B    | PB     | O3A    | PA     | 171.897  |
| 4     | PB     | O3A    | PA     | O2A    | -125.8   |
| 5     | PB     | O3A    | PA     | O1A    | -1.447   |
| 6     | O3A    | PA     | O1A    | O2A    | -127.941 |
| 7     | O3A    | PA     | O1     | C1     | -70.847  |
| 8     | PA     | O1     | C1     | C2     | 142.79   |
| 9     | O1     | C1     | C2     | C3     | 112.354  |
| 10    | C1     | C2     | C3     | C4     | -0.697   |
| 11    | C2     | C3     | C5     | C6     | -36.839  |
| 12    | C4     | C3     | C5     | C6     | 143.835  |
| 13    | C3     | C5     | C6     | C7     | -175.389 |
| 14    | C5     | C6     | C7     | C8     | -137.806 |
| 15    | C6     | C7     | C8     | C10    | 0.636    |

|    |     |     |     |     |          |
|----|-----|-----|-----|-----|----------|
| 16 | C6  | C7  | C8  | C9  | -178.932 |
| 17 | C7  | C8  | C9  | C11 | -8.651   |
| 18 | C8  | C9  | C11 | C12 | 176.477  |
| 19 | C10 | C8  | C9  | C11 | 171.775  |
| 20 | C9  | C11 | C12 | C13 | 132.37   |
| 21 | C11 | C12 | C13 | C14 | -0.463   |
| 22 | C11 | C12 | C13 | C15 | 179.575  |

1.3 Building binding sites *de novo* into protein-protein interfaces. We scanned the interface scaffold set for backbones that may accommodate the small molecule target and binding site geometry using a geometric matching procedure(22). For each binding site geometry, the relationship between the motif side-chains and the target is uniquely defined by 6 geometric constraints. The matching algorithm scans the first motif residue constraints across a set of scaffold residue positions (here, all positions with Ca atoms within 15 Å of the other chain). At each position, the motif residue is placed into rotameric conformations from the Dunbrack backbone-dependent rotamer library(39). For each side-chain conformation, the small molecule target is placed relative to the motif residue using the geometric constraints defined from the template binding site geometry. Conformations that place the target without introducing steric clashes between the motif side-chain, the target, and the scaffold backbone are recorded. The process is iterated for the remaining motif residues, comparing the clash-free target positions to those from the previous motif residues using an efficient geometric hashing technique. Motif side-chain conformations that place the target within the same geometric ‘bin’ as positions from the previous motif side-chains are recorded as ‘hits’. At the conclusion, cases where the target is placed into the same geometric bin for all motif residues are called ‘matches’. Only matches where at least one motif side-chain is placed on a different chain than the remaining motif side-chains (i.e., across the scaffold interface) are considered further. Many matches may be found for a set of scaffold

interface residue positions, corresponding to highly similar conformations for the motif residue side-chains and the target that fall into the same geometric bin. One such match is randomly selected for design, which is termed a ‘unique match’. The numbers of unique matches arising from each template binding site geometry for FPP are shown below:

| Template PDB | Motif residues                                  | Number of unique matches |
|--------------|-------------------------------------------------|--------------------------|
| 1kzo         | chain B: R291, Y251, W303.<br>chain C: I10.     | 79                       |
| 1t0a         | chain A: I101, F9.<br>chain B: F9. chain C: F9. | 371                      |
| 3bnx         | chain A: R314, W308, L184, F153.                | 370                      |
| 3dpy         | chain B: R291, Y251, W303.<br>chain C: I2008.   | 43                       |

The quality and quantity of matching results are tuned by a number of parameters. To slightly relax the angle and torsion constraints, we sampled 5 degrees above and below the values computed from the template binding site geometry. There are also Euclidean and Euler parameters that determine the bin size for geometric hashing, which we set to 2.0 Å and 20.0 degrees, respectively. A bump tolerance parameter allowed for some steric overlap – to be resolved in the design stage – which we set to 0.6. We also allowed motif residues to be matched by other residue types with similar side-chain moieties. The following groups of residues were allowed to be matched by any residue in the group: “DE”, “LVI”, “FYW”, and “ST”. We tuned the matching parameters to produce a reasonable number of unique matches for design (on the order of several hundred). Evaluating matches directly is not necessarily informative, since a good match (one that faithfully reproduces the template binding site geometry) may yield poor designs due to an inability of the ‘second shell’ residues to accommodate the binding site geometry and target, while less precise matches may yield more promising designs after being subjected to rigid body optimization of the ligand and backbone relaxation of the scaffold. Thus, all unique matches are passed on to design.



A number of parameters control Rosetta-specific matching options, including the number of side-chain conformations sampled. The command line options used for Rosetta revision r35441 were as follows:

```
match.linuxgccrelease -database minirosetta_database -s 1SVX.pdb -match:lig_name LG1 -  
match:grid_boundary 1SVX.gridlig -match:scaffold_active_site_residues 1SVX.pos -  
match:geometric_constraint_file 3bnx.cst -extra_res_fa 3bnx_LG.fa.params -  
output_matches_per_group 10 -ex1 -ex2 -extrachi_cutoff 0 -euclid_bin_size 2.0 -euler_bin_size  
20.0 -bump_tolerance 0.6 -match:output_format PDB -match:consolidate_matches -  
match:output_matches_only
```

1.4 Initial designs and analysis. The matching algorithm places the motif residues and target into a scaffold interface while avoiding clashes with the backbone. However, the procedure will likely introduce unfavorable interactions with the residues surrounding the motif, or ‘second shell’ residues. In order to accommodate the target and binding motif, we applied a protocol that iterates between rigid body optimization of the ligand(40) and sequence design of the second shell residues(41, 42). Rigid body optimization of the ligand was performed by sampling from a Gaussian distribution with mean 2.0 degrees for rotation and from a Gaussian distribution with mean 0.1 Å for translation of the ligand, which are the default values for -enzdes:trans\_magnitude and -enzdes:rot\_magnitude. In the design step, all residues with a Ca atom within 6.0 Å of any ligand heavy atom were designable (they could change residue type), as well as any residue with a Ca atom within 8.0 Å of any ligand heavy atom that also has a Cb atom closer to the ligand than the Ca atom. Additionally, all residues with a Ca atom within 10.0 Å of any ligand heavy atom are

subject to repacking (Metropolis Monte Carlo optimization of side-chain conformations) together with any residue with a Ca atom within 12.0 Å of the ligand with a Cb atom that is closer to the ligand than the Ca atom. The protocol iterates rigid body optimization and sequence design 3 times, producing interfaces with more favorable interactions between the motif residues, target, and second shell residues.

The command line options used for Rosetta revision r36129 were as follows:

```
EnzdesFixBB.linuxgccrelease -database minirosetta_database -s 1BH9_R33Y94L120F121.pdb -  
extra_res_fa 3bnx_LG.fa.params enzdes:detect_design_interface -enzdes:cut1 6.0 -enzdes:cut2  
8.0 -enzdes:cut3 10.0 -enzdes:cut4 12.0 -enzdes:cst_opt -enzdes:cst_design -enzdes:cst_min -  
enzdes:cstfile 3bnx.cst -enzdes:bb_min -enzdes:chi_min -enzdes:design_min_cycles 3 -ex1 -ex2  
-use_input_sc -nstruct 999 -enzdes:start_from_random_rb_conf
```

For each template binding site geometry we produced on the order of  $10^4$  designs and created distributions over computed physicochemical properties. Four of these distributions from the 3bnx template binding site geometry are shown below:

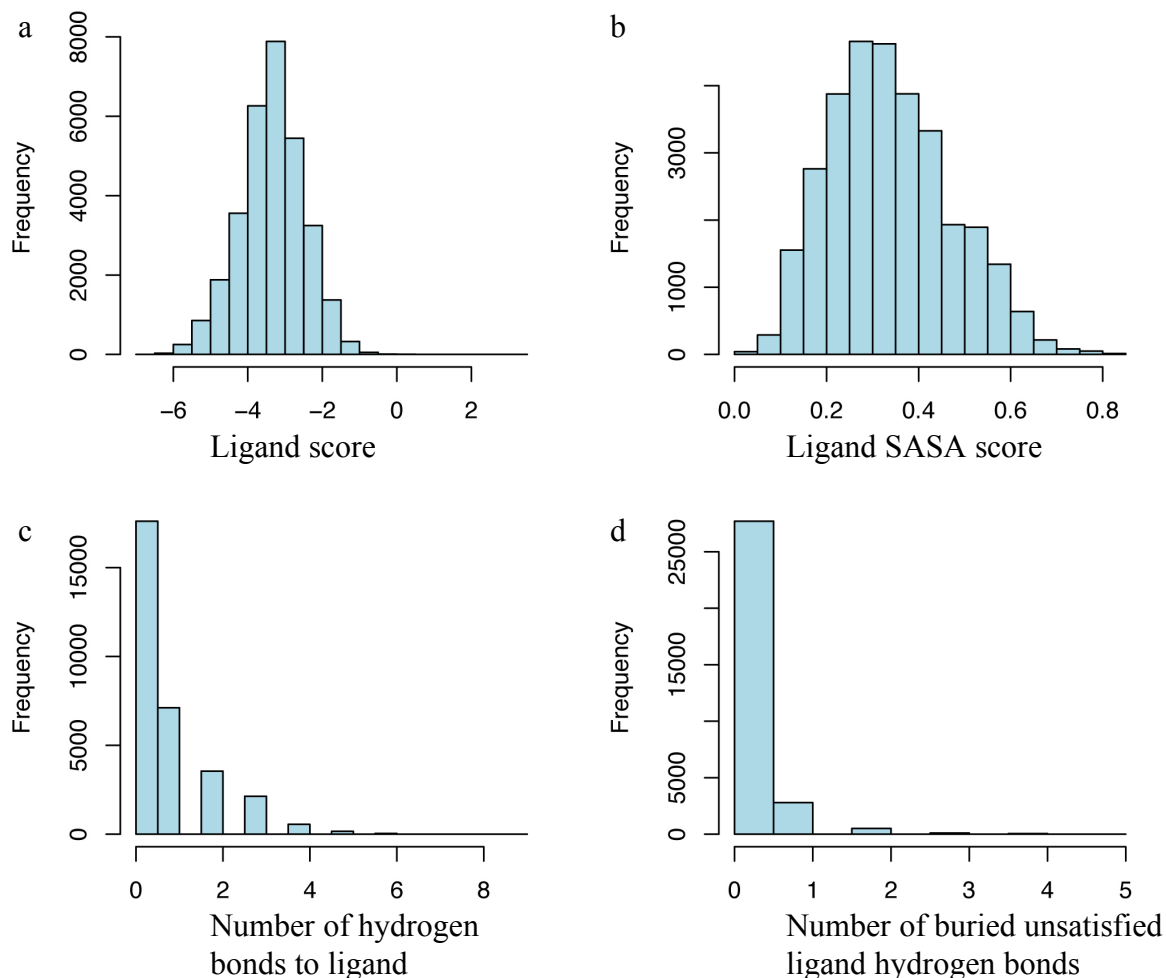

The ligand score (panel a) corresponds to the predicted binding energy between the ligand and scaffold interface. The ligand solvent accessible surface area (SASA, panel b) score measures the burial of the ligand from 0.0 (completely solvent exposed) to 1.0 (completely buried). The number of hydrogen bonds between the scaffold and the ligand (panel c) and the number of buried unsatisfied hydrogen bonds on the ligand (panel d) are also shown. For FPP, visual inspection of representative members of the distributions across all designs suggested the following filter for selecting designs for further refinement: ligand score  $< -6.0$ , ligand SASA  $> 0.6$ , ligand hydrogen bonds  $> 1$ , unsatisfied buried ligand hydrogen bonds = 0. The number of designs passing the filter for all FPP binding site geometries is given below:

| Template PDB | Motif residues                               | Number of unique matches | Number of designs passing filter    |
|--------------|----------------------------------------------|--------------------------|-------------------------------------|
| 1kzo         | chain B: R291, Y251, W303. chain C: I10      | 79                       | 31                                  |
| 1t0a         | chain A: I101, F9. chain B: F9. chain C: F9. | 371                      | 0 (1 if SASA filter relaxed to 0.5) |
| 3bnx         | chain A: R314, W308, L184, F153.             | 370                      | 81                                  |
| 3dpy         | chain B: R291, Y251, W303. chain C: I2008.   | 43                       | 0 (2 if SASA filter relaxed to 0.5) |

Passing designs were then further filtered to remove interface scaffolds imposing additional challenges such as cases with small molecules crystallized at the predicted target binding site and complexes that were purified from inclusion bodies.

Ultimately, a design passing all filters with the best ligand score on an interface scaffolds, the complex (PDB 1svx) between an engineered ankyrin repeat protein (AR) and maltose binding protein (MBP) with a 4-residue binding site geometry from template 3bnx, was selected for refinement by flexible backbone ensemble design.

1.5 Flexible backbone ensemble design. To model the conformational adjustments that could occur in concert with sequence mutations, matched scaffold designs were subject to kinematic closure (KIC(24)) over their entire backbones producing conformational ensembles. In brief, KIC generates backbone conformations of segments in proteins by sampling backbone phi/psi torsion angles for  $n-6$  degrees of freedom (“non-pivot” torsions) in a selected segment, and then solving the remaining 6 “pivot” degrees of freedom analytically to close the loop. To generate a protein backbone ensemble, different segment start and end points are sampled throughout the protein. Here, we generated near-native conformational ensembles with KIC (200 conformations with 0.9 Å average rmsd to the X-ray structure) using a modified protocol(23) compared to the published

*de novo* loop reconstruction method(24). The ensemble generation protocol skips the low-resolution centroid stage and fixes the temperature at 1.2 *kT*. Further, to focus sampling on near-native conformations, non-pivot torsions are sampled within a vicinity of 3 degrees of the input value before each kinematic move, instead of sampling from the allowable Ramachandran space.

A second round of Rosetta sequence design was then applied across the ensembles to the side-chains surrounding the *de novo* built binding site in order to accommodate the motif residues and the small molecule target. Designing across a conformational ensemble, rather than a single backbone, can improve agreement between the geometry of the binding site built into the scaffold interface and the original geometry in the binding site template, and generates a diversity of predicted low-energy sequences(23, 43, 44).

The command line used to generate the ensemble with Rosetta r36129 was as follows:

```
loopmodel.linuxgccrelease -database minirosetta_database -loops:refine refine_kic -  
loops:max_kic_build_attempts 10000 -loops:input_pdb  
1SVX_R134W103L78Y286__DE_19.pdb -loops:loop_file  
1SVX_R134W103L78Y286__DE_19.loop -extra_res_fa  
1SVX_R134W103L78Y286__DE_19_LG.fa.params -in:file:extra_res_cen  
1SVX_R134W103L78Y286__DE_19_LG.cen.params -in:file:native  
1SVX_R134W103L78Y286__DE_19.pdb -loops:kic_max_seglen 12 -loops:outer_cycles 1 -  
loops:refine_init_temp 1.2 -loops:refine_final_temp 1.2 -loops:vicinity_sampling -  
loops:vicinity_degree 3 -ex1 -ex2
```

A similar protocol for small molecule rigid body optimization and scaffold sequence design from section 1.4 was applied to refine every member of the KIC ensemble. Additional rotamers were included (*via* the -ex3 -ex4 Rosetta command line flags), and the selection of residues to be redesigned, fixed, or modeled as wild-type was performed manually rather than selected by distance cutoffs (redesigned positions for the 1svx scaffold are shown in **Figure 2A**). Designs resulting from this step were further optimized for small molecule dependence on complex formation by requiring a ligand score  $< -6.0$ , ligand SASA  $> 0.7$ , ligand hydrogen bonds  $> 1$ , and unsatisfied buried ligand hydrogen bonds = 0. In addition to selecting single designs (see below), designing across a conformational ensemble, rather than a single backbone, produced a sequence library(45) (**Table S2**) to be assayed in *E. coli* for biosensor activity. In KIC ensemble design, we performed 200 independent design simulations in parallel (one for each backbone) and then combined the results into a sequence profile computed from the lowest energy sequence and conformation from simulated annealing Metropolis Monte-Carlo simulations in the design step. Design calculations minimized the Rosetta full-atom energy (see command lines for version numbers and options). The most frequently designed amino acid residues at each position are shown in **Fig. 2A**.

In addition to KIC ensemble design, we also used a second method for flexible backbone design: coupled moves(25). In contrast to KIC ensemble design, which first pre-generates an ensemble and then performs design on each member of the ensemble, coupled moves simultaneously moves the backbone and side chain of an amino acid (or rigid-body and conformer of the ligand) during design. In these simulations, we started from the model of design S3-1C (**Fig. 2A**) with FPP placed into the AR-MBP scaffold through matching with 4 motif residues (AR: L89, W114, R145; MBP:

F133), followed by coupled moves design performed as described in (25), allowing the motif residues and the following additional residues to design: AR: Y81, H85, Y89, W112, M114, T115, H118, L119, K122, W123, F145, K147, I152, D155; MBP: E130, P133, F194, D197, K200, N201, K251. Ligand rigid-body rotations and translations were sampled using two Gaussian distributions with a 1 degree standard deviation for rotations and a 0.1Å standard deviation for translations. Coupled moves design simulations were performed using Rosetta rotamer flags “-ex1 -ex2 -extrachi\_cutoff 0 -use\_input\_sc” and were run at a constant temperature of 0.6 kT. The backbone moves used in these simulations were 3-residue “backrub” moves(46) centered on the amino acid being designed. Amino acid residues preferred in these simulations at key positions are shown in **Figure 2A**.

KIC ensemble simulations took approximately 30 minutes on a single processor and were run over 200 nodes, for a total of approximately 100 CPU hours. In comparison, coupled moves simulations took approximately 4 CPU hours (12 minutes per simulation and 20 simulations total).

1.6 Design ranking and selection. We chose four computational designs for FPP sensors based on the AR/MBP (PDB 1svx) scaffold for testing:

S3-1A: Computational design ranked most highly by ligand burial

S3-1B: Computational design consensus sequence, based on most frequently selected amino acid residues in KIC ensemble design

S3-1C: Computational design with improved protein-ligand packing interactions

S3-1D: Computational design ranked most highly by predicted interaction affinity with the ligand

Models of these designs are shown below in two orientations. The orientation shown on the left was rotated  $45^\circ$  over the  $x$ -axis to attain the orientation shown on the right. AR: cyan, MBP: blue, FPP: magenta sticks, motif residues: sticks, designed residues: green spheres.



**S3-1A**

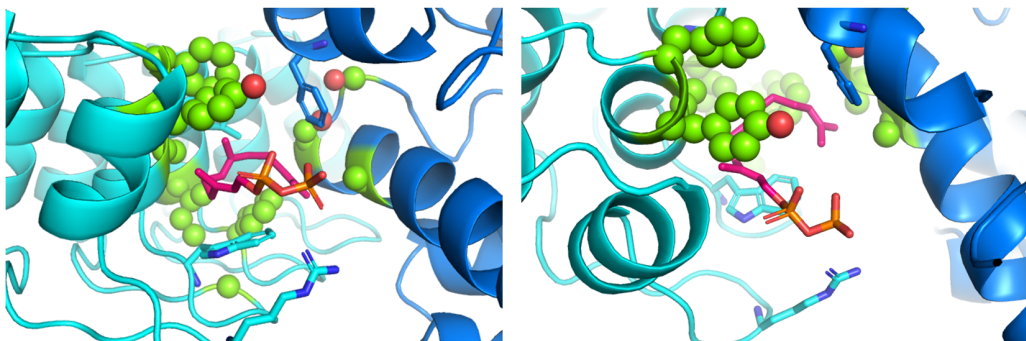

**S3-1B**

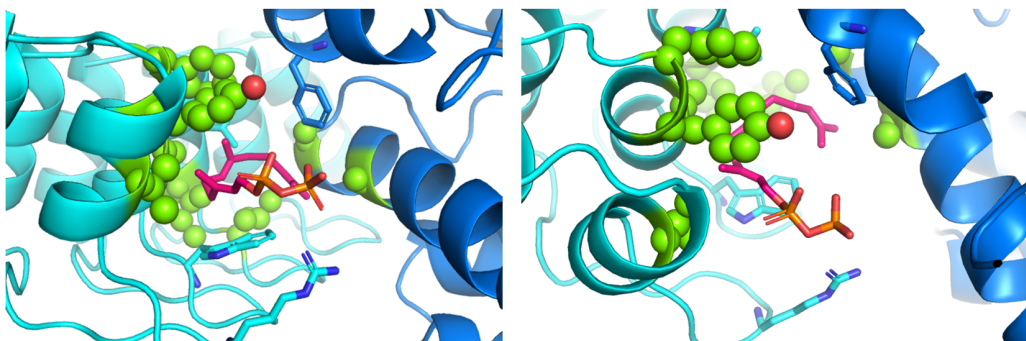

**S3-1C**

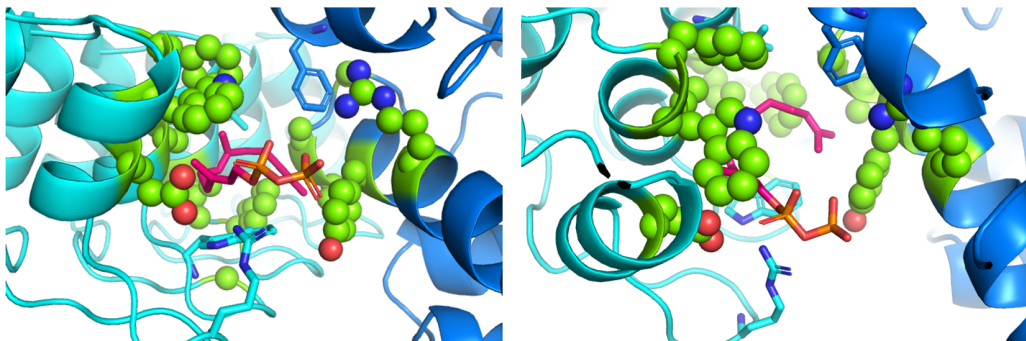

**S3-1D**

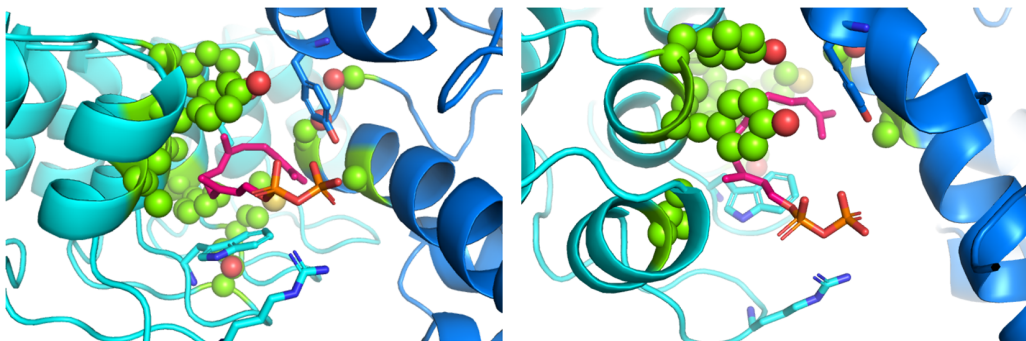

1.7 Computational methods that resulted in designs on scaffolds 1 and 2. Designs for scaffolds 1 and 2 resulted from the same overall protocol as described above, with the following modifications:

(i) We used expanded protein-protein interface scaffold sets consisting of 809 (for scaffold 1) or 3462 (for scaffold 2) heterodimers. Scaffolds were pre-relaxed using Rosetta FastRelax<sup>(47)</sup> with constraints to the starting coordinates for both backbone and side-chain atoms.

(ii) We used the following FPP binding site motifs:

| <b>Scaffold</b>                 | <b>Template PDB</b> | <b>Motif residues</b>  |
|---------------------------------|---------------------|------------------------|
| Scaffold 1 FRB/FKBP (3FAP.pdb)  | 3bnx                | F153, L184, W308, R314 |
| Scaffold 2 RapF/ComA (3ULQ.pdb) | 3bnx                | F153, R314, Y315, F87  |

(iii) Optimization of the ligand orientation in the binding site used gradient-based minimization of the input structure before design; during this minimization, all designable residues that are not constrained are mutated to alanine and a reduced energy function that does not contain vdW\_attractive or solvation terms (and is thus dominated by repulsive interactions) is used for minimization; during this minimization process, rigid body optimization of the ligand is performed (via setting jump edges between the ligand and protein residues to true when creating the enzdes movemap); the purpose of this stage is to optimize the motif-residue interactions with the ligand before design.

(iv) We did not use backbone ensembles to reshape the binding site environment around the motif residues built into the scaffold, but instead used Rosetta FastRelax to optimize both side chains and backbone in the binding site environment after the design step.

(v) We selected designs for testing based on the top predicted ligand binding score.

For scaffold 1, we selected one design (S1-1A) that contained the following wild-type reversions: A28G, T36F, W46F, H48F, M59W, L193Y determined by visual inspection.

For scaffold 2, we selected 4 designs:

S2-1A: computationally designed sequence.

S2-1B: computationally designed with wild-type reversions: V21I, M404L and mutations of designed alanine residues: A28G, A32S, A59R.

S2-1C: as S2-1B with 2 additional alanine mutations to destabilize the wild-type protein-protein interaction: D23A, N418A.

S2-1D: as S2-1A with 2 additional mutations: W12F, A411M.

(vi) Runs leading to the design on scaffold 1 used Rosetta version 44618 with the following command lines:

Building sites into scaffolds (matching):

```
match.linuxgccrelease
-database ROSETTA_DATABASE
-s INPUT_PDB
-match lig_name LG1
-match grid_boundary GRIDLIG_FILE
-match scaffold_active_site_residues POSFILE
-match geometric_constraint_file CST_FILE
-extra_res_fa FA_PARAMS
-output_matches_per_group 1
-ex1 -ex2 -extrachi_cutoff 0
-euclid_bin_size 1.75 -euler_bin_size 17.5 -bump_tolerance 0.525
-out path OUTDIR
-match output_format PDB
-match consolidate_matches
```

Design step:

```
enzyme_design.linuxgccrelease
-database ROSETTA_DATABASE
-enzdes:cstfile CONSTRAINTS_FILE
-extra_res_fa FA_PARAMS
-out:file:o design.score
-s INPUT_PDB
-enzdes:detect_design_interface
```

-enzdes:cst\_design  
-mute core.io.database  
-mute core.scoring.hbonds  
-overwrite  
-out:pdb\_gz  
-enzdes:cut1 6.0  
-enzdes:cut2 8.0  
-enzdes:cut3 10.0  
-enzdes:cut4 12.0  
-enzdes:cst\_opt  
-enzdes:cst\_min  
-enzdes:bb\_min  
-enzdes:chi\_min  
-enzdes:design\_min\_cycles 3  
-ex1  
-ex2  
-extrachi\_cutoff 0  
-use\_input\_sc  
-enzdes:start\_from\_random\_rb\_conf  
-enzdes:final\_repack\_without\_ligand  
-nstruct 10

#### Fastrelax of designs:

relax.linuxgccrelease  
-database ROSETTA\_DATABASE  
-in:file:fullatom  
-overwrite  
-nstruct 1  
-out:pdb\_gz  
-relax:fast  
-constrain\_relax\_to\_start\_coords  
-extra\_res\_fa FA\_PARAMS  
-in:file:s INPUT\_PDB  
-in:file:native INPUT\_PDB

#### Rescoring relaxed designs:

enzyme\_design.linuxgccrelease  
-database ROSETTA\_DATABASE  
-s INPUT\_PDB  
-out:file:o design.rescore  
-enzdes:detect\_design\_interface  
-enzdes:cut1 0.0  
-enzdes:cut2 0.0  
-enzdes:cut3 10.0  
-enzdes:cut4 12.0  
-mute core.io.database

```
-mute core.scoring.hbonds
-out:pdb_gz
-ex1 -ex2 -extrachi_cutoff 0 -use_input_sc
-enzdes:no_unconstrained_repack
-enzdes:final_repack_without_ligand
-enzdes:enz_score
-extra_res_fa FA_PARAMS
-enzdes:cstfile CST_FILE
```

Runs leading to the designs on scaffold 2 used Rosetta version 49508 with the following

command lines:

#### Building sites into scaffolds (matching):

```
match.linuxgccrelease -database ROSETTA_DATABASE -s INPUT_PDB -match::lig_name
LG1 -match::grid_boundary GRIDLIG_FILE -match::scaffold_active_site_residues POSFILE -
match::geometric_constraint_file CST_FILE -extra_res_fa FA_PARAMS_FILE -
output_matches_per_group 1 -match:consolidate_matches -out:file:scorefile -ex1 -ex2 -
extrachi_cutoff 0 -use_input_sc -euclid_bin_size 1.5 -euler_bin_size 15 -bump_tolerance 0.5 -
out::path OUTDIR -match:output_format PDB
```

#### Design step:

```
enzyme_design.linuxgccrelease -database ROSETTA_DATABASE -s INPUT_PDB -
in:file:fullatom -out:file:o designs.score -extra_res_fa FA_PARAMS_FILE -enzdes:cstfile
CONSTRAINTS_FILE -overwrite -out:pdb_gz -nstruct 10 -enzdes:cst_design -
enzdes:detect_design_interface -enzdes:cut1 6.0 -enzdes:cut2 8.0 -enzdes:cut3 10.0 -enzdes:cut4
12.0 -enzdes:cst_opt -enzdes:cst_min -enzdes:bb_min -enzdes:chi_min -
enzdes:design_min_cycles 3 -ex1 -ex2 -extrachi_cutoff 0 -use_input_sc -
enzdes:start_from_random_rb_conf -enzdes:final_repack_without_ligand -score:weights
enzdez.wts
```

#### Fastrelax of designs:

```
relax.linuxgccrelease -database ROSETTA_DATABASE -s INPUT_PDB -extra_res_fa
FA_PARAMS_FILE -out:pdb_gz -out::path OUTDIR -ignore_zero_occupancy false -relax:fast -
relax:constrain_relax_to_start_coords -ex1 -ex2 -extrachi_cutoff 0 -use_input_sc -score:weights
enzdez.wts -preserve_header -nstruct 10
```

#### Rescoring relaxed designs:

```
enzyme_design.linuxgccrelease -database ROSETTA_DATABASE -s INPUT_PDB -
in:file:fullatom -out:file:o designs.score -extra_res_fa FA_PARAMS_FILE -enzdes:cstfile
CONSTRAINTS_FILE -overwrite -out:pdb_gz -enzdes:detect_design_interface -enzdes:cut1 0.0
-enzdes:cut2 0.0 -enzdes:cut3 10.0 -enzdes:cut4 12.0 -ex1 -ex2 -extrachi_cutoff 0 -use_input_sc
-enzdes:no_unconstrained_repack -enzdes:lig_packer_weight 1.8 -
enzdes:final_repack_without_ligand -score:weights enzdez.wts
```

1.8 Computational methods to further stabilize sensor S3-2D. Using the crystal structure for S3-2D as the input structure, we used the RosettaScripts platform to apply two successive cycles of coupled moves(25) to improve FPP-protein interactions and the binding pocket stability. The input structure was pre-relaxed using Rosetta FastRelax with constraints to the starting coordinates for both backbone and side-chain atoms. In each cycle of coupled moves, we chose a different group of neighboring residues in the binding pocket to be designed. The second cycle received the lowest-energy structure from the previous cycle as the input structure. Results were ranked according to total energy. Structures and sequences of top-ranked designs were manually inspected to choose which designs to experimentally test.

| <b>Coupled moves cycle</b> | <b>Designed protein</b>   | <b>Designable residues</b>                     |
|----------------------------|---------------------------|------------------------------------------------|
| 1                          | AR of S3-2D<br>(AR-2.7)   | 80-82, 84-86, 88-90, 118-122, 141-145, 150-155 |
| 2                          | MBP of S3-2D<br>(MBP-2.5) | 132-134, 196-202, 250-252                      |

Rosetta commands (Rosetta 3.8, commit f3a3f038d9419c0d79a6030ea4dc16f62668d69f):

FastRelax of crystal structure:

```
relax.linuxgccrelease -database ROSETTA_DATABASE -in:file:s INPUT_PDB -in:file:fullatom
-relax:constrain_relax_to_start_coords -extra_res_fa FA_PARAMS_FILE
```

Design flags:

```
-in:file:s INPUT_PDB
-extra_res_fa FA_PARAMS_FILE
-packing
  -ex1
  -ex1aro
  -extrachi_cutoff 0
  -ex2
-number_ligands 1
-coupled_moves
  -ntrials 10000
  -initial_repack false
  -min_pack true
  -ligand_mode true
  -ligand_weight 2.0
```

-nstruct 20

RosettaScript to run coupled moves:

```
<ROSETTASCRIPTS>
  <SCOREFXNS>
    <ScoreFunction name="ref15"/>
  </SCOREFXNS>

  <TASKOPERATIONS>
    <ReadResfile name="AR_resfile" filename=RESFILE_NAME_1/>
    <ReadResfile name="MBP_resfile" filename= RESFILE_NAME_2/>
  </TASKOPERATIONS>

  <MOVERS>
    <CoupledMovesProtocol name="coupled_moves_AR" task_operations="AR_resfile"/>
    <CoupledMovesProtocol name="coupled_moves_MBP" task_operations="MBP_resfile"/>
    <DumpPdb name="dump" fname="dump" tag_time="1"/>
    <FastRelax name="fastrelax" repeats="5"/>
  </MOVERS>

  <PROTOCOLS>
    <Add mover_name="coupled_moves_AR"/>
    <Add mover_name="dump"/>
    <Add mover_name="coupled_moves_MBP"/>
  </PROTOCOLS>
</ROSETTASCRIPTS>
```

## 2. Complementation assay with split murine dihydrofolate reductase (mDHFR).

2.1 Constructs and strains. We tested sensor function in *E. coli* strain DH10B using complementation of split mDHFR(30). The constructs used in this assay are listed in **Appendix 1** and the gene sequences are listed in **Appendix 4**. For all MBP genes tested in the mDHFR assay, we deleted the sequence corresponding to the last alpha helix in the structure (residues 354-370). This modification was made to bring the two sensor protein termini closer together for facile complementation of the attached split mDHFR constructs upon small-molecule mediated dimerization. A detailed protocol of the assay is given below.

2.2 Liquid culture assay. Fresh preparations were made of filter-sterilized 0.2 M isopropyl  $\beta$ -D-1-thiogalactopyranoside (IPTG) in sterile deionized water, 20% L-arabinose in sterile deionized water, 5 mg/ml trimethoprim (TMP) (Sigma) solution in methanol, and autoclaved M9 medium (0.1 mM CaCl<sub>2</sub>, 1X M9 salts, 2 mM MgSO<sub>4</sub>, 0.4% glucose, 0.2% Casaminoacids, 10 mg/ml leucine, 10 mg/ml isoleucine, 5 mg/ml thiamine, all filter-sterilized). One 4 ml overnight culture was grown at 37 °C and 225 rpm for each strain from freshly transformed plates in M9 medium with 37  $\mu$ g/ml chloramphenicol and 50  $\mu$ g/ml spectinomycin. To prepare media for the assay, the following was added to 49 ml M9 medium: 37  $\mu$ g/ml chloramphenicol and 50  $\mu$ g/ml spectinomycin, 60  $\mu$ M IPTG (unless otherwise noted), 0.4% L-arabinose, and 6  $\mu$ g/ml TMP (unless otherwise noted). All reagents were thawed completely, vortexed, and centrifuged prior to addition to the master mix to avoid precipitants. All ingredients were gently mixed in a Falcon tube, and then 4 ml of the master mix was aliquoted into new culture tubes. Each overnight culture was gently vortexed, checked for complete resolubilization of any chunks, diluted 1 to 100 in fresh



medium, and poured into a reagent reservoir. Using a multichannel pipette, 200  $\mu$ l of the diluted cultures were transferred to the wells of a transparent, flat-bottom 96-well plate (Costar), 8 wells at a time. A final concentration of 5 mM mevalonate (Sigma) (unless otherwise noted) was added to every other column via 1 to 1000 dilution of a 1 M stock solution in Millipore water. To prevent evaporation of medium, 50  $\mu$ l mineral oil was gently pipetted on top of each well's contents. The plate was centrifuged for 30 seconds to pop bubbles and any remaining bubbles were popped manually with a pipette tip. The plate was placed in a shaker and grown at 35 °C and 200 rpm for 48 hours. After 48 hours of growth, cultures were mixed gently using a multichannel pipette set to 50  $\mu$ l, avoiding disturbance of the mineral oil layer. Bubbles were removed using a Bunsen burner flame and/or pipette tips. Cell culture optical density (OD) was read over the whole plate, without a plate cap, at 600 nm using a Tecan Safire 2 microplate reader.

## 2.3 Library selection/screening and saturation mutagenesis

2.3.1 Library construction. The computationally designed library (library 1, **Table S2**) was constructed using gene assembly mutagenesis(48). Briefly, multiple oligonucleotides were synthesized to assemble the design regions of AR and MBP, and 14 and 16 oligonucleotides were generated to cover the protein-protein interface of AR and MBP respectively. Computationally predicted mutations within the regions were introduced into the designed oligonucleotides using degenerate codons that code for a list of desired amino acids (**Table S2**). These synthesized oligonucleotides were combined and assembled using a two-step PCR to form the library of AR and MBP fragments, and both sets of the fragments were cloned sequentially into pCDFDuet to

obtain the final library constructs. We also constructed an additional library using error-prone PCR starting from design S3-1C (library 2).

2.3.2 Library selection and screening. The library constructs were electroporated into DH10B *E. coli* and plated onto M9 minimal medium plates containing 100  $\mu$ M IPTG, 0.4 % L-arabinose, 5 mM mevalonate and 6  $\mu$ g/ml TMP. The plates were cultured for 10 days at room temperature. Clones that survived under TMP selection were potential active candidates that could form functional mDHFR and were enriched in this selection.

We performed selection on  $\sim 3 \times 10^5$  members of each library (limited by transformation efficiency), which led to the isolation of 1536 active clones from each library after enrichment for growth via split mDHFR complementation. The selected clones were then subjected to an array-based colony-printing assay (described below, Fig. S3). From this assay, we identified 36 hits from which we confirmed 27 unique sequences (7 from library 1 and 20 from library 2) by individual growth assays (Fig. S4, Fig. S5).

In the colony-printing assay, freshly grown overnight cultures of each selected clone were 100X diluted and spotted onto two sets of M9 minimal medium plates, one with 5 mM mevalonate and one without. Both sets of the plates contained 100  $\mu$ M IPTG, 0.4 % L-arabinose and 6  $\mu$ g/ml TMP. The plates were cultured for 10 days at room temperature. Clones that showed increased growth (as indicated by the size of the colonies) with the addition of mevalonate after 10 days were selected and individually tested using the liquid culture assay as described above. The same conditions were kept in the liquid culture screening.

2.3.3 Saturation mutagenesis. We performed two rounds of iterative saturation mutagenesis (ISM(49), **Table S3**). For each round, 11 positions (AR: position 85, 112, 118, 119, 122, 123, 152, 155; MBP: 194, 197, 251) around the designed binding site were allowed to mutate to any of 20 amino acids coded by NNK degenerate codon starting from S3-2A. Only one of 11 positions was allowed to mutate at a time (a.k.a. single-site saturation). The best clone from the first round of ISM (S3-2B) was used as the starting sequence for the second round of ISM. A total of 384 clones and 480 clones were screened in the colony printing assay in the presence and absence of FPP in the first and second round of ISM respectively. The top clones for each round were screened using the liquid culture assay as described above using 80  $\mu$ M IPTG, 0.4 % L-arabinose, 5 mM mevalonate and 6  $\mu$ g/ml TMP.

### 3. Protein purification

3.1 Constructs. We expressed and purified several S3 sensor proteins for further characterization. The expression plasmids are listed in **Appendix 2** and the gene sequences are listed in **Appendix 4**. For all MBP genes in expression plasmids, we included the sequence corresponding to the last alpha helix in the structure (residues 354-370).

3.2 Purification of ankyrin repeat (AR) proteins. Overnight cultures of BL21(DE3) pLysS cells (Novagen) harboring the pET47-6XHis-AR plasmid were grown with 37  $\mu$ g/ml chloramphenicol and 50  $\mu$ g/ml kanamycin for 14-18 hours at 37 °C and 225 rpm in lysogeny broth (LB) medium. Overnight cultures were diluted 1 to 50 in LB and grown at 37 °C and 225 rpm until the OD<sub>600</sub> reached approximately 0.6 (about two hours). Cultures were induced with 0.5 mM IPTG and

further grown at 16 °C overnight. Cells were pelleted by centrifugation at 6,000 g for 20 minutes. Pellets from 1 L cell cultures were stored at -80 °C. Frozen cell pellets were thawed on ice for 20 minutes and resuspended by vortexing in 40 ml lysis buffer (25 mM Tris, 500 mM NaCl, pH 8.0). The following components were added to the cell resuspension: 5 mM MgCl<sub>2</sub>, 1 mM MnCl<sub>2</sub>, 100 μM CaCl<sub>2</sub>, one protease inhibitor tablet (Thermo Fisher), and 5 μL 2000 units/ml DNaseI per ml lysis buffer. Cells were lysed by the addition of 10X BugBuster (Thermo Fisher) to a final concentration of 1X, mixed gently, and stored at room temperature for 5 minutes. Cell lysate was centrifuged at 27,000 g for 30 minutes at 4 °C. The supernatant was decanted into a fresh tube, and imidazole was added to 20 mM. The soluble lysate was further incubated on ice for 1 hour to allow any remaining precipitate to form, then centrifuged at 3,700 g for 10 minutes at 4 °C. The supernatant was transferred to a fresh tube, mixed with 3 ml Ni-NTA Slurry (Thermo Fisher) per 40 ml lysate, and mixed at 4 °C on a nutator for 1 hour. The lysate-slurry mix was centrifuged at 500 g for 5 minutes at 4 °C and the supernatant was immediately discarded. The pelleted resin was resuspended in two resin-volumes of cold wash buffer (25 mM Tris, 500 mM NaCl, 20 mM imidazole, pH 8.0) and applied to a Ni<sup>2+</sup>-NTA gravity column, then the column was washed with two column volumes of cold wash buffer. Protein was eluted with 1.5 column volumes in 25 mM Tris, 500 mM NaCl, 250 mM imidazole, pH 8.0. The eluate was desalted into 25 mM Tris, 50 mM NaCl, pH 8.0 using an AKTA FPLC with a Hiprep 26/10 desalting column, then ion-exchanged using a Hitrap Q HP column into 25 mM Tris, 500 mM NaCl, pH 8.0. The resulting protein solution was concentrated down to 5 ml using 3 KDa MW cutoff spin concentrators (Sartorius), applied to a size-exclusion HiLoad 16/60 Superdex 75 column, and eluted in 50 mM Tris, 150 mM NaCl, pH 8.0. The eluate was concentrated to 1.5 ml and dialyzed three times against 1 L 25 mM Tris, 150 mM NaCl, pH 8.0, for two hours, overnight, and two hours, respectively. The final protein

concentration was determined in the denatured state in 6 M guanidinium hydrochloride, 20 mM potassium phosphate solution and the purity was confirmed by Coomassie-stained SDS-PAGE to be > 95%.

3.3 Purification of maltose binding proteins (MBP). Methods for the growth and lysis of BL21(DE3) pLysS cells with pET28-MBP plasmids were similar to those described above for AR proteins, with the following modifications: (1) overnight cultures were subcultured with 0.2% glucose, and (2) lysis buffer was composed of 25 mM Tris, 150 mM NaCl, pH 8.0. Isolation of the soluble lysate was followed by incubation on ice for 1 hour, then centrifugation at 3,700 g for 10 minutes at 4 °C. The supernatant was decanted into a fresh tube, applied to an MBP affinity column (MBPtrap HP column) using an AKTA FPLC, and eluted in 50 mM Tris, 150 mM NaCl, 30 mM maltose, pH 8.0. The volume of the protein solution was reduced to 5 ml using 10 KDa MW cutoff spin concentrators (Millipore) and applied to a size-exclusion HiLoad 16/60 Superdex 75 column, and eluted in 50 mM Tris, 150 mM NaCl, pH 8.0. The size exclusion eluate volume was concentrated down to 1.5 ml and dialyzed three times against 1 L 25 mM Tris, 150 mM NaCl, pH 8.0, for two hours, overnight, and two hours, respectively. The final protein concentration was determined in the denatured state in 6 M guanidinium hydrochloride, 20 mM potassium phosphate solution and the purity was confirmed by Coomassie-stained SDS-PAGE to be >98%.

#### 4. *In vitro* binding assays using bio-layer interferometry (BLI)

4.1 Constructs. We purified several S3 sensor protein pairs to determine their *in vitro* binding affinity in the presence and absence of FPP by BLI. In our BLI experiments, one protein is tethered to an optically transparent biosensor tip by a biotin-streptavidin interaction, and the other protein is present as the analyte in solution in the microplate. BLI expression plasmids are listed in **Appendix 2** and the gene sequences are listed in **Appendix 4**. Constructs for BLI experiments included the sequence corresponding to the last alpha helix in MBP (residues 354-370).

4.2 Biotinylation of avi-MBP. Avi-tagged MBP (**Appendix 2**) was prepared at 66  $\mu\text{M}$  in 10 mM Tris buffer, pH 8.0. The BirA-500 biotin-protein ligase kit from Avidity was used as per the manufacturer's instructions, with a final avi-MBP concentration of 40  $\mu\text{M}$  and 2.5  $\mu\text{g}$  BirA enzyme per 10 nmol protein. The reaction was performed at 30 °C for 45 minutes, and then buffer-exchanged by spin concentration and 50-fold dilution three times in fresh 25 mM Tris, 150 mM NaCl buffer, pH 8.0, to remove excess biotin and reaction components. Biotinylated avi-MBP was diluted to 40  $\mu\text{M}$  and stored at 4 °C for use in BLI measurements.

4.3 BLI. Affinity measurements between avi-tagged MBP, AR and FPP were performed at room temperature using an Octet RED96 system and streptavidin (SA)-coated biosensor tips (Pall ForteBio). Avi-MBP was diluted to 400 nM in HBS-P buffer (0.01 M HEPES pH 7.4, 0.15 M NaCl, 0.005% v/v Surfactant P20) to be used as the antigen. Antigen-bound SA-tips were washed, exposed to the analyte solutions during an association period, and then allowed to unbind from the analyte during a dissociation period. For experiments including FPP, the analyte solution was

composed of 0-24  $\mu\text{M}$  AR and 200  $\mu\text{M}$  FPP. For experiments measuring the affinity of MBP for AR without FPP, the analyte solution was composed of 0-500  $\mu\text{M}$  AR. The binding protocol was as follows: rinse tips in HBS-P buffer, 60 seconds; load tips with antigen, 300 seconds; establish baseline by rinsing tips in HBS-P buffer, 60 seconds; association with analyte, 60 seconds; dissociation in baseline wells, 600 seconds. Raw data was fit to 1:1 binding curves in Octet Data Analysis HT software using curve fitting kinetic analysis with local fitting. The theoretical equilibrium binding signal response data ( $R$  equilibrium) were normalized by the steady-state group maximum response ( $R_{\text{max}}$ ) values, and the steady state affinity was determined using the Hill equation,

$$\theta = \frac{1}{\frac{K_A}{[L]} + 1},$$

where  $\theta$  is the fraction of MBP that is bound to AR,  $K_A$  is the AR concentration at which half the MBP are occupied; and  $[L]$  is the concentration of unbound AR. Non-cooperative binding kinetics are assumed. All binding curves fit the BLI data with  $R^2 > 0.90$ .

## 5. Cell-free transcription-translation (TxTl) assay

5.1 Constructs. Plasmids for TxTl experiments were constructed using standard BsaI/BsmBI Golden Gate cloning methods as described in Engler *et al.*(50) using our group's adaptation of the MoClo Yeast Tool Kit strategy as described in Lee *et al.*(51). For all MBP genes in TxTl plasmids, we included the sequence corresponding to the last alpha helix in the structure (residues 354-370). A comprehensive list of plasmids is available in **Appendix 3**.

5.2 TxTl protocol. Separate 30  $\mu$ l TxTl reactions were prepared for each plasmid (expressing MBP or AR variants) as described in Sun *et al.*(52) and incubated for 8-16 hours at 29 °C. Each reaction also included 0.2 nM of the TxTl1 plasmid for RNA polymerase expression (**Appendix 3**) and 1 mM IPTG. The cell extract was prepared from Rosetta 2 cells (EMD Millipore). All TxTl reactions were mixed 1 to 1 with phosphate buffered saline/1% bovine serum albumin (PBS/BSA solution) for a total protein solution volume of 60  $\mu$ l. A master mix was prepared by mixing 1 volume TxTl extract expressing an MBP variant, 1 volume TxTl extract expressing an AR variant, and 2 volumes PBS/BSA solution. Master mix aliquots of 27  $\mu$ l were mixed with 3  $\mu$ l farnesyl pyrophosphate (FPP) (Sigma) stock solutions in water with concentrations ranging from 1  $\mu$ M to 2 mM. These 30  $\mu$ l solutions were distributed in 9.5  $\mu$ l aliquots in a white opaque 384 well plate for luminescence measurements or a black opaque 384 well plate for fluorescence measurements, centrifuged for 30 seconds to remove bubbles, and stored at room temperature for 10 minutes. For luminescence measurements, 1 ml plus 10  $\mu$ l per well of Promega NanoGlo buffer was thawed on ice and mixed with a 50-fold dilution of furimazine substrate to make NanoGlo reagent, as described in Dixon *et al.*(34). The reagent was distributed in 9.5  $\mu$ l aliquots to all wells containing



9.5  $\mu\text{l}$  protein/FPP sample. After ten minutes, a SpectraMax L luminometer (Molecular Devices) was used to take luminescence readings using analog detection and injection, following priming of the injection lines with 1 ml NanoGlo reagent. Data were collected with the following machine settings: integration time, 1 s; PMT setting, photon counting; automix setting, classic with 5 s mix duration and 30 mm/s mix speed; M-injection, with injector volume 10  $\mu\text{l}$ , post-injection delay 1 s; injection speed 320  $\mu\text{l/s}$ , and no shaking after injection; and dark adapt set to off. For fluorescence measurements, a Tecan Safire 2 microplate reader was used to read ddGFP complementation from the top of the plate at excitation/emission wavelengths of 380 nm and 508 nm, with the gain set to 100.

5.3 Data fitting for *in vitro* FPP titration measurements. Raw background-subtracted luminescence and fluorescence data from TxTI assay measurements were averaged for each FPP concentration and fit to a modified three-parameter logistic nonlinear regression model of the Hill equation,

$$\hat{Y} = a + \frac{b-a}{1+\frac{c}{x}},$$

where  $\hat{Y}$  is the expected response at FPP concentration  $x$ ,  $a$  is the minimum response when no FPP is present,  $b$  is the maximum response, and  $c$  is the FPP concentration at which half the protein sensors are bound, allowing for a fluorescent or luminescent output. Data and fit were normalized by subtracting the calculated minimum response and dividing by the difference of the calculated maximum and minimum responses.

## 6. Crystallography.

6.1 Constructs. The plasmids used to express S3-2D sensor proteins for crystallography are listed in **Appendix 2**. Their sequences are listed in **Appendix 4**. Methods for protein expression and purification are described in Section 3.

6.2 Crystallization. AR and MBP were each prepared at 340  $\mu\text{M}$  and mixed 1:1 to obtain each protein at 170  $\mu\text{M}$  in solution. FPP was prepared at 170 mM in 70% ethanol and diluted 100-fold in the protein solution for a final concentration of 1.7 mM FPP. We carried out initial crystallization trials in 15-well hanging drop format using EasyXtal crystallization plates (Qiagen) and a crystallization screen that was designed to explore the chemical space around the crystallization conditions reported by Binz *et al.* (29) for the co-crystal structure of their AR-MBP complex (PDBID:1SVX). Crystallization drops were prepared by mixing 1  $\mu\text{l}$  of protein solution with 1  $\mu\text{l}$  of the mother liquor, and sealing the drop inside a reservoir containing an additional 500  $\mu\text{l}$  of the mother liquor solution. Thin, plate-like crystals were obtained in many of the conditions tested, with the largest single crystals growing from drops prepared using mother liquor containing 0.1 M Tris Buffer pH 8.7, 0.1 M sodium chloride, and 32% PEG-6000. The crystals could not be obtained without the addition of the FPP ligand, and we used SDS-PAGE to confirm that both proteins required to form the heterodimer were present in the crystals (after harvesting and washing in mother liquor without protein).

6.3 X-ray data collection and processing. Prior to X-ray data collection, crystals were dehydrated overnight in a solution containing 0.1 M Tris Buffer pH 8.7, 0.1 M sodium chloride, and 45%

PEG-6000. Next, the crystals were soaked in a solution containing 0.1 M Tris Buffer pH 8.7, 0.1 M sodium chloride, 42% PEG-6000, 7% ethanol, and 18 mM FPP for 30 minutes before they were harvested and flash-cooled in liquid nitrogen. The soaking steps were essential to improve the quality of the observed X-ray diffraction patterns, and to ensure adequate occupancy of the FPP ligand in the resulting electron density maps. No cryoprotectant was necessary due to the high concentration of PEG-6000 in the soaking solutions.

We collected single-crystal X-ray diffraction data on beamline 8.3.1 at the Advanced Light Source. The beamline was equipped with an ADSC Quantum 315r CCD detector, and the crystals were maintained at a cryogenic temperature (100 K) throughout the course of data collection.

We processed the X-ray data using the Xia2 system(53), which performed indexing, integration, and scaling with XDS and XSCALE(54), followed by merging with Pointless(55). A resolution cutoff (2.20 Å) was taken where the completeness of the data fell to a value of approximately 90%. Although other metrics of data quality (such as CC1/2 and  $\langle I/\sigma I \rangle$ ) suggest that a more aggressive resolution cutoff would be acceptable, we were limited by physical constraints on the experimental geometry. Specifically, the plate-like morphology of the crystals resulted in the long axis of the unit cell always being perpendicular to the crystal rotation ( $\phi$ ) axis, which constrained the minimum sample-to-detector distance and the maximum Bragg angle that could be recorded on the detector without producing overlap between individual reflections. Further information regarding data collection and processing is presented in **Table S4**. The reduced diffraction data were analyzed with phenix.xtriage ([http://www.ccp4.ac.uk/newsletters/newsletter43/articles/PHZ\\_RWGK\\_PDA.pdf](http://www.ccp4.ac.uk/newsletters/newsletter43/articles/PHZ_RWGK_PDA.pdf)) to check for

crystal pathologies , which revealed the presence of pseudomerohedral twinning based on the results of the L-test ( $\langle |L| \rangle = 0.399$ ,  $\langle L_2 \rangle = 0.225$ )(56). Pseudomerohedral twinning is uncommon, however it has been reported previously in the literature(57) and is not unprecedented in macromolecular crystallography(58-61).

6.4 Structure determination. We obtained initial phase information for calculation of electron density maps by molecular replacement using the program Phaser(62), as implemented in the PHENIX suite(63). We searched for each component of the heterodimer independently, using separate models of AR (PDBID: 1SVX, chain A) and the “closed” (ligand-bound) form of MBP (PDBID: 1FDQ). We explicitly did not use the design model for molecular replacement to avoid the introduction of model bias. Two complete copies of the heterodimer were found in the unit cell, consistent with an analysis of Matthews probabilities for the observed unit cell and molecular weight of the heterodimer(64, 65).

Next, we attempted to rebuild the missing or incorrect parts of the molecular replacement solution using the electron-density maps calculated from model phases, however, the presence of twinning compromised the quality of the initial maps. To improve the interpretability of the electron density maps, we carried out a round of atomic refinement using phenix.refine(66) in which we also refined the twin fraction (twin operator =  $h, -k, -l$ ; refined twin fraction,  $\alpha = 0.49$ ). The twin refinement improved the map quality substantially, allowing us to rebuild the missing or incorrect parts of the structure. Additional iterative steps of manual model rebuilding and atomic refinement were performed, and during this process we found evidence for several small molecule ligands in both  $2mF_o - DF_c$  and  $mF_o - DF_c$  electron density maps. Specifically, we identified an FPP molecule

occupying one of the computationally-designed binding sites, as well as two maltose disaccharides (one bound to each copy of MBP). The presence of merohedral twinning can present challenges for map interpretation because the structure factor detwinning process can exacerbate the effects of model phase bias(57). Consequently, we took extra care with the placement of the FPP ligand into electron density features around the designed binding site. The initial placement of the ligand was motivated by the observation of several strong electron density peaks near a key lysine residue and in the hydrophobic binding cavity, which could be attributed to the pyrophosphate group and aliphatic tail of FPP, respectively. Refinement of the structure with FPP in the binding site resulted in a rearrangement of side chains in contact with the ligand, providing additional evidence that this binding site is occupied. Specifically, Trp114 of AR becomes ordered upon FPP binding, and Y197 in MBP rotates and displaces a small network of two neighboring water molecules (**Figure S11**). After adding the ligands, we performed additional refinement of atomic positions, and individual atomic displacement parameters (B-factors), and occupancies using non-crystallographic symmetry (NCS) and secondary structure restraints, a riding hydrogen model, and automatic weight optimization. The occupancy of the FPP ligand was set to 1.0 during the refinement, so that the heterogeneity of the binding site would be captured entirely by the B-factors. Following refinement, the atomic B-factors of the FPP ligand were similar to those of the surrounding protein atoms, suggesting that the binding site was relatively well occupied and that the ligand is modeled in a reasonable pose. Furthermore, there are no abrupt variations in the B-factors of atoms that are nearby in space, an additional indication that the ligand is appropriately placed. The average B factor of the ligand is 35.5, which is slightly, but not unusually higher than surrounding atoms: The average B factor of atoms on the AR (chain D) within 5 Å of any ligand atom is 29.3, within 10 Å is 29.1, within 15 Å is 29.1. The average B factor of atoms on the MBP (chain B) within 5 Å

is 23.4, within 10 Å is 20.1, within 15 Å is 19.1. After refining the model to convergence, we further verified the presence of the FPP ligand in the model by repeating our final refinement starting from atomic coordinates without the ligand atoms. This “omit refinement” produced  $2mF_o - DF_c$  and  $mF_o - DF_c$  omit maps and allowed us to assess the effect of including the ligand. The omit maps showed density that was highly similar to the original maps that permitted initial placement of FPP (**Figure S10**). The absence of FPP in the second ligand binding site could be the result of distortions to the heterodimeric interface caused by crystallization, or by the dehydration procedure that was required to improve the diffraction resolution. All model building was performed using Coot(67) and refinement steps were performed with phenix.refine (v1.13-2998) within the PHENIX suite(63, 66). Restraints for the maltose and FPP ligands were calculated using phenix.elbow(68). The final model coordinates were deposited in the Protein Data Bank (PDB(69)) under accession code 6OB5. Further information regarding model building and refinement is presented in **Table S4**.

## Supplementary Text

There are several potential limitations that need to be considered when engineering and applying CID systems:

First, the difference in affinity of the two sensor proteins in the presence and absence of the small molecule should be large to maximize the achievable sensor amplitude (see also **Fig. S14**). It is hence advantageous for computational and experimental engineering approaches to select for both stabilization of the ternary complex in the presence of the small molecule and destabilization of the protein-protein heterodimer complex in the absence of the small molecule. In our case, we experimentally screened sensor candidates in both the presence and absence of the small molecule. Our initial computational design protocol selected for designs with large favorable ligand binding energies, and the design selected by most favorable ligand score (S3-1D) showed the largest sensor signal in the *in vivo* DHFR assay (**Fig. 2C**). *In vitro* affinity measurements on sensors S3-2D and S3-3A (**Fig. 3B,C**) showed a large destabilization of the protein-protein heterodimer complex in the absence of FPP (45,000-fold destabilized compared to the original AR-MBP scaffold). However, in our subsequent optimization of the design based on the S3-2D crystal structure, we only optimized for ternary complex stability but did not simultaneously optimize for dimer complex destabilization. The resulting mutations stabilized both the ternary and the dimer complexes, effectively reducing the dynamic range of the sensor. Negative design approaches(32) could be incorporated to destabilize the dimer complex in the simulation.

Second, there are several failure modes for computational designs, including (i) issues with properly reconstituting the split reporter, (ii) failure of the designs to fold or express at sufficient concentrations, or (iii) insufficient binding to the small molecule ligand across the complex interface (see also **Fig. S2**).

Third, there are considerations important to the application of CID systems. For example, we imagine two principal applications for an FPP sensor. The first would be to use FPP detection in directed evolution experiments to optimize expression or activity of enzymes in the pathway producing FPP. The second more complex application(21) would be to dynamically regulate the activity of enzymes in the FPP pathway to keep FPP accumulation below toxic levels. For both cases, but particularly the latter, a DHFR-based screen using growth as the output would not be optimal as growth conditions in an actual application would be vastly different; however, we show that different modular outputs that are not linked to cell survival can be coupled to our sensors (**Fig. 3G, H**). Moreover, in an application the sensitivity of a sensor would have to match FPP production levels; a family of FPP sensors with different sensitivities could be used. Finally, CID systems in general could be subject to combinatorial inhibition where the sensor signal is diminished at high ligand concentrations, because the ligand forms dimeric complexes with each of the sensor halves reducing the effective concentration of ternary complexes. In our case, however, binding of FPP to the designed MBP component of S3-2D alone was not detectable up to at least 200  $\mu\text{M}$ .



**Table S1. Summary of computational designs.** The design ID lists scaffold first (S1, S2, S3), followed by design round (1, 2, 3), followed by a letter (A, B, etc). The nomenclature for the individual sensor proteins lists protein, design round, and a consecutive number denoting the protein's variant.

| Scaffold (WT PDB)                               | Design ID                                                                         | Sensor Protein A | Sensor Protein B | Design / Engineering Method                                                                               |
|-------------------------------------------------|-----------------------------------------------------------------------------------|------------------|------------------|-----------------------------------------------------------------------------------------------------------|
| <b>Scaffold 1:</b><br>FKBP12 -FRB<br>(3FAP.pdb) | S1-1A                                                                             | FKBP12-1.1       | FRB-1.1          | Computational Design                                                                                      |
| <b>Scaffold 2:</b><br>RapF-ComA<br>(3ULQ.pdb)   | S2-1A                                                                             | RapF-1.1         | ComA-1.1         | Computational Design                                                                                      |
|                                                 | S2-1B                                                                             | RapF-1.2         | ComA-1.2         | Computational Design                                                                                      |
|                                                 | S2-1C                                                                             | RapF-1.3         | ComA-1.3         | Computational Design                                                                                      |
|                                                 | S2-1D                                                                             | RapF-1.4         | ComA-1.4         | Computational Design                                                                                      |
| <b>Scaffold 3:</b><br>AR-MBP<br>(1SVX.pdb)      | <b>Computational designs (group 1)</b>                                            |                  |                  |                                                                                                           |
|                                                 | S3-1A                                                                             | AR-1.1           | MBP-1.1          | Computational Design, best ligand burial                                                                  |
|                                                 | S3-1B                                                                             | AR-1.2           | MBP-1.2          | Computational Design, consensus                                                                           |
|                                                 | S3-1C                                                                             | AR-1.3           | MBP-1.3          | Computational Design, optimized ligand packing                                                            |
|                                                 | S3-1D                                                                             | AR-1.4           | MBP-1.4          | Computational Design, best ligand score                                                                   |
|                                                 | <b>Computational designs with stability enhancing mutations (group 2)</b>         |                  |                  |                                                                                                           |
|                                                 | S3-2A                                                                             | AR-2.5           | MBP-1.3          | Hit from error-prone PCR (identical to design S3-1C except for 2 mutations in AR: N102H, A104E)           |
|                                                 | S3-2B                                                                             | AR-2.5           | MBP-2.5          | S3-2A with stability enhancing mutation from saturation mutagenesis in MBP: R194A                         |
|                                                 | S3-2C                                                                             | AR-2.6           | MBP-2.5          | S3-2A with stability enhancing mutations from saturation mutagenesis:<br>MBP: R194A<br>AR: L85G           |
|                                                 | S3-2D                                                                             | AR-2.7           | MBP-2.5          | S3-2C with published stabilizing mutations in AR*: W122K, E152L, A149P, S153A, L161I, I164V, L168A, N169A |
|                                                 | <b>Computational designs with designed affinity enhancing mutations (group 3)</b> |                  |                  |                                                                                                           |
|                                                 | S3-3A                                                                             | AR-2.7           | MBP-3.6          | S3-2D with affinity enhancing mutation in MBP from KIC ensemble design: Y197A                             |
|                                                 | S3-3B                                                                             | AR-3.8           | MBP-2.5          | S3-2D with affinity enhancing mutations in AR from coupled moves: R145K, K147L, D155L                     |
|                                                 | S3-3C                                                                             | AR-3.8           | MBP-3.6          | S3-2D with affinity enhancing mutations in AR and MBP:<br>AR: R145K, K147L, D155L<br>MBP: Y197A           |

\* from reference (31)

**Table S2. Computationally designed library.** We designed a sequence library with  $2.4 \times 10^6$  members using degenerate codons (top) based on the dominant residues predicted computationally (bottom). The library was tested using the plate-based split mDHFR assay. Hits were defined as sensor sequences that grew better in the presence of mevalonate. Residues are shown with motif positions in red and wild-type residues shaded grey. Residues with minor frequencies in the flexible design predictions are shown as lower-case letters.

| Sequence position            | 81               | 85     | 89               | 114 | 119 | 122                        | 123                                                 | 145 | 152              | 133              | 194 | 197         | 200              | 201                        | 203 |
|------------------------------|------------------|--------|------------------|-----|-----|----------------------------|-----------------------------------------------------|-----|------------------|------------------|-----|-------------|------------------|----------------------------|-----|
| Protein                      | AR               |        |                  |     |     |                            |                                                     |     |                  | MBP              |     |             |                  |                            |     |
| Wild-type residue            | Y                | H      | Y                | M   | L   | K                          | W                                                   | F   | I                | P                | F   | D           | K                | N                          | H   |
| Library codon                | WTK              | WTT    | WTK              | TGG | GCG | KHT                        | BHK                                                 | CGT | RYT              | YWT              | -   | GVC         | RMG              | KHT                        | -   |
| Library residues (plus F79A) | F<br>I<br>L<br>M | F<br>I | F<br>I<br>L<br>M | W   | A   | A<br>D<br>F<br>S<br>V<br>Y | F<br>Y<br>A<br>S<br>V<br>D<br>L<br>P<br>H<br>Q<br>E | R   | A<br>I<br>T<br>V | F<br>H<br>L<br>Y | -   | A<br>D<br>G | A<br>E<br>K<br>T | A<br>D<br>F<br>S<br>V<br>Y | -   |
| Residues in library hits     | I<br>L<br>M      | F<br>I | F<br>M           | W   | A   | D<br>S<br>V<br>Y           | Y<br>A<br>V<br>L<br>E                               | R   | I<br>T<br>V      | F<br>Y<br>H      | -   | D<br>A<br>G | K<br>E<br>A      | N<br>A<br>D                | -   |

### Computational predictions

| Sequence position                                                   | 81                    | 85               | 89     | 114                   | 119 | 122              | 123                        | 145              | 152         | 133    | 194    | 197              | 200    | 201              | 203         |
|---------------------------------------------------------------------|-----------------------|------------------|--------|-----------------------|-----|------------------|----------------------------|------------------|-------------|--------|--------|------------------|--------|------------------|-------------|
| Protein                                                             | AR                    |                  |        |                       |     |                  |                            |                  |             | MBP    |        |                  |        |                  |             |
| Computational Design (Top-ranked individual Sequences) (+99: D,G,T) | F<br>I<br>L<br>M      | F<br>I<br>L      | L      | W                     | A   | Y<br>W           | F<br>Y                     | R                | I<br>V<br>E | F<br>Y | F<br>R | A<br>Y           | A<br>K | A<br>S           | A<br>H<br>S |
| Computational Predictions (KIC Ensemble)                            | a<br>F<br>i<br>L<br>M | a<br>F<br>I<br>m | L      | W                     | A   | A<br>F<br>l<br>Y | A<br>e<br>F<br>h<br>q<br>Y | R                | A<br>V      | F<br>Y | -      | A<br>G           | A      | A<br>L<br>F<br>Y | -           |
| Computational Predictions (coupled moves)                           | F                     | F<br>H<br>L<br>M | L<br>M | A<br>F<br>H<br>V<br>W | A   | F<br>W<br>Y      | F<br>M<br>Y                | E<br>R<br>N<br>T | H<br>F<br>Y | F<br>Y | F<br>W | A<br>F<br>H<br>Y | A      | A<br>S           | -           |

**Table S3: Single-site saturation mutagenesis positions and results.**

| Sequence position                                        | 85     | 112                                   | 118                                   | 119    | 122              | 123                   | 152         | 155                                   | 194                                   | 197         | 251                                   |
|----------------------------------------------------------|--------|---------------------------------------|---------------------------------------|--------|------------------|-----------------------|-------------|---------------------------------------|---------------------------------------|-------------|---------------------------------------|
| Protein                                                  | AR     |                                       |                                       |        |                  |                       |             |                                       | MBP                                   |             |                                       |
| Wild-type residue                                        | H      | D                                     | H                                     | L      | K                | W                     | I           | D                                     | F                                     | D           | K                                     |
| Residues in library hits                                 | F<br>I | Not varied in comp.<br>library design | Not varied in comp.<br>library design | A      | D<br>S<br>V<br>Y | Y<br>A<br>V<br>L<br>E | I<br>H<br>V | Not varied in comp.<br>library design | Not varied in comp.<br>library design | D<br>A<br>G | Not varied in comp.<br>library design |
| Residue in design S3-1D                                  | F      | D                                     | H                                     | A      | Y                | Y                     | V           | D                                     | F                                     | A           | K                                     |
| Residue in design S3-1C                                  | L      | D                                     | H                                     | A      | W                | F                     | E           | D                                     | R                                     | Y           | K                                     |
| Residue in design S3-2A                                  | L      | D                                     | H                                     | A      | W                | F                     | E           | D                                     | R                                     | Y           | K                                     |
| Saturation mutagenesis hits round 1, starting from S3-2A | -      | -                                     | L<br>N<br>P                           | -      | V<br>L           | -                     | -           | -                                     | A<br>G<br>F                           | -           | -                                     |
| Best from combination of hits round 1 (design S3-2B)     | L      | D                                     | H                                     | A      | W                | F                     | E           | D                                     | A                                     | Y           | K                                     |
| Saturation mutagenesis hits round 2, starting from S3-2B | G      | -                                     | T<br>I                                | P<br>R | -                | -                     | -           | -                                     | -                                     | -           | -                                     |
| Best from round 2 (design S3-2C)                         | G      | D                                     | H                                     | A      | W                | F                     | E           | D                                     | A                                     | Y           | K                                     |

**Table S4: X-ray data reduction and model refinement.**

|                                        |                                                                   |
|----------------------------------------|-------------------------------------------------------------------|
| Wavelength                             | 1.116Å                                                            |
| Resolution Range                       | 95.47-2.20 (2.24-2.20)                                            |
| Unit Cell                              | a=44.57Å , b=190.92Å , c=55.48Å<br>$\alpha=\beta=\gamma=90^\circ$ |
| Space Group                            | $P2_1$                                                            |
| Unique Reflections                     | 45972 (7746)                                                      |
| Multiplicity                           | 3.7 (3.6)                                                         |
| Completeness                           | 98.5% (91.5%)                                                     |
| $\langle I/\sigma \rangle$             | 17.5 (8.3)                                                        |
| $CC_{1/2}$ <sup>a</sup>                | 0.997 (0.966)                                                     |
| $R_{pim}$ <sup>b</sup>                 | 0.033 (0.090)                                                     |
| $R_{work}$ <sup>c</sup>                | 0.2071 (0.3448)                                                   |
| $R_{free}$ <sup>c</sup>                | 0.2596 (0.4761)                                                   |
| Total Refined Atoms                    | 8115                                                              |
| Protein Residues                       | 1022                                                              |
| Solvent Molecules                      | 141                                                               |
| Refined Ligand Atoms                   | 70                                                                |
| Average B-factor                       | 21.6Å <sup>2</sup>                                                |
| RMSD <sub>bonds</sub>                  | 0.003Å                                                            |
| RMSD <sub>angles</sub>                 | 0.56°                                                             |
| Rama. Plot:                            |                                                                   |
| Favored                                | 97.1%                                                             |
| Allowed                                | 2.9%                                                              |
| Outliers                               | 0.0%                                                              |
| Molprobability Clashscore <sup>d</sup> | 3.97                                                              |
| PDB ID                                 | 6OB5                                                              |

- a. Reference (70)  
b. Reference (53)  
c. Reference (71)  
d. Reference (72)

## Figure S1

### Scaffold 1:

#### FKBP-12

```
      1           20           40           60
      |           |           |           |
FKBP12-WT  GVQVETISPGDGRTPFKRGQTCVVHYTGMLEDGKKEDSSSRDRNKEFKFMLGKQEVIRGWEEGVAQMSVQRAKLTISPD
FKBP12-1.1 GVQVETISPGDGRTPFKRGQTCVVHITGMLEDGKKEISSSRDRNKEFKFMLGKQRVLRGWEEGVAQMSVQRAKLTISPD

      80           100
      |           |
FKBP12-WT  YAYGATGHPGIIPPHATLVFDVLELLKLE
FKBP12-1.1 YAFGATGHPGIIPPHATLVFDVLELLKLE
```

#### FRB

```
     108           127           147           167
     |           |           |           |
FRB-WT  VAILWHEMWHEGLEEASRLYFGERNVKGMFEVLEPLHAMMERGPQTLKETSFNQAYGRDLMEAQEWCRKYMKSGNVKDL
FRB-1.1 VAILWHEMWHEGAEEAARRLYRGERNVKGMFEVLEPLHAMMERGPQTLKETSFNQAYGRDLMEAQEWCRKYMKSGNVKDL

     187
     |
FRB-WT  TDAWDLYYHVFRRIS
FRB-1.1 WQAMLLYAHVRDRIS
```

### Scaffold 2:

#### RapF

```
      1           20           40           60
      |           |           |           |
RapF-WT  SSSSIGEKINEWYMYIRRFSIPDAEYLRREIKQELDQMEEDQDLHLHYSLMFFRHNLMLEYLEPLEKMRIEEQPRLSDL
RapF-1.1 SSSSIGEKINEWYMYIRRFSIPDAAYLAFEIAQELDQMEEDQDLHLHYSLMLFRAYLMAEYLEPLEKMRIEEQPRLSDL
RapF-1.2 SSSSIGEKINEWYMYIRRFSVPDAAYLGFEISQELDQMEEDQDLHLHYSLMLFRAYLMREYLEPLEKMRIEEQPRLSDL
RapF-1.3 SSSSIGEKINEWYMYIRRFSVFAAYLGFEISQELDQMEEDQDLHLHYSLMLFRAYLMREYLEPLEKMRIEEQPRLSDL
RapF-1.4 SSSSIGEKINEFYMYIRRFSIPDAAYLAFEIAQELDQMEEDQDLHLHYSLMLFRAYLMREYLEPLEKMRIEEQPRLSDL

      80
      |
RapF-WT  LLEIDKK
RapF-1.1 LLEIDKK
RapF-1.2 LLEIDKK
RapF-1.3 LLEIDKK
RapF-1.4 LLEIDKK
```

#### ComA

```
     377           396           416
     |           |           |
ComA-WT  VLTPRECLILQEVEKGFTNQEIADALHLSKRSIEYSLTSIFNKLNVGSRTEAVLIAKS
ComA-1.1 VLTPRECLILQEVEKGFTNQEIADALHLRKSAIEASLTSIFNKLNVGSRTEAVLIAKS
ComA-1.2 VLTPRECLILQEVEKGFTNQEIADALHMRKSAIEASLTSIFNKLNVGSRTEAVLIAKS
ComA-1.3 VLTPRECLILQEVEKGFTNQEIADALHMRKSAIEASLTSIFAKLNVGSRTEAVLIAKS
ComA-1.4 VLTPRECLILQEVEKGFTNQEIADALHLRKSAIEMSLTSIFNKLNVGSRTEAVLIAKS
```

### Scaffold 3:

#### MBP

```

      1           20           40           60
      |           |           |           |
MBP-WT KIEEGKLVIIWINGDKGYNGLAEVGKKFEKDTGIKVTVEHPDKLEEKFPQVAATGDGPDIIFWAHDRFGGYAQSGLLAEI
MBP-1.1 KIEEGKLVIIWINGDKGYNGLAEVGKKFEKDTGIKVTVEHPDKLEEKFPQVAATGDGPDIIFWAHDRFGGYAQSGLLAEI
MBP-1.2 KIEEGKLVIIWINGDKGYNGLAEVGKKFEKDTGIKVTVEHPDKLEEKFPQVAATGDGPDIIFWAHDRFGGYAQSGLLAEI
MBP-1.3 KIEEGKLVIIWINGDKGYNGLAEVGKKFEKDTGIKVTVEHPDKLEEKFPQVAATGDGPDIIFWAHDRFGGYAQSGLLAEI
MBP-1.4 KIEEGKLVIIWINGDKGYNGLAEVGKKFEKDTGIKVTVEHPDKLEEKFPQVAATGDGPDIIFWAHDRFGGYAQSGLLAEI
MBP-2.5 KIEEGKLVIIWINGDKGYNGLAEVGKKFEKDTGIKVTVEHPDKLEEKFPQVAATGDGPDIIFWAHDRFGGYAQSGLLAEI
MBP-3.6 KIEEGKLVIIWINGDKGYNGLAEVGKKFEKDTGIKVTVEHPDKLEEKFPQVAATGDGPDIIFWAHDRFGGYAQSGLLAEI

      80           100          120          140
      |           |           |           |
MBP-WT TPKKAFQDKLYPFTWDVRYNGKLIAYPIAVEALSLIYNKDLLNPPKWTWEEIFALDKELKAKGKSALMFNLQEPYFTW
MBP-1.1 TPKKAFQDKLYPFTWDVRYNGKLIAYPIAVEALSLIYNKDLLNPPKWTWEEIFALDKELKAKGKSALMFNLQEPYFTW
MBP-1.2 TPKKAFQDKLYPFTWDVRYNGKLIAYPIAVEALSLIYNKDLLNPPKWTWEEIFALDKELKAKGKSALMFNLQEPYFTW
MBP-1.3 TPKKAFQDKLYPFTWDVRYNGKLIAYPIAVEALSLIYNKDLLNPPKWTWEEIFALDKELKAKGKSALMFNLQEPYFTW
MBP-1.4 TPKKAFQDKLYPFTWDVRYNGKLIAYPIAVEALSLIYNKDLLNPPKWTWEEIFALDKELKAKGKSALMFNLQEPYFTW
MBP-2.5 TPKKAFQDKLYPFTWDVRYNGKLIAYPIAVEALSLIYNKDLLNPPKWTWEEIFALDKELKAKGKSALMFNLQEPYFTW
MBP-3.6 TPKKAFQDKLYPFTWDVRYNGKLIAYPIAVEALSLIYNKDLLNPPKWTWEEIFALDKELKAKGKSALMFNLQEPYFTW

      160          180          200          220
      |           |           |           |
MBP-WT PLIAADGGYAFKYENKGYDIKDVGVNDNAGAKAGLTFVLVLIKAKHMNADTDYSIAEAAFNKGETAMTINGPWAWNSNIDT
MBP-1.1 PLIAADGGYAFKYENKGYDIKDVGVNDNAGAKAGLTFVLVLIKAKHMNADTDYSIAEAAFNKGETAMTINGPWAWNSNIDT
MBP-1.2 PLIAADGGYAFKYENKGYDIKDVGVNDNAGAKAGLTFVLVLIKAKHMNADTDYSIAEAAFNKGETAMTINGPWAWNSNIDT
MBP-1.3 PLIAADGGYAFKYENKGYDIKDVGVNDNAGAKAGLTLVLYLIIKAKHMNADTDYSIAEAAFNKGETAMTINGPWAWNSNIDT
MBP-1.4 PLIAADGGYAFKYENKGYDIKDVGVNDNAGAKAGLTFVLVLIKAKHMNADTDYSIAEAAFNKGETAMTINGPWAWNSNIDT
MBP-2.5 PLIAADGGYAFKYENKGYDIKDVGVNDNAGAKAGLTLVLYLIIKAKHMNADTDYSIAEAAFNKGETAMTINGPWAWNSNIDT
MBP-3.6 PLIAADGGYAFKYENKGYDIKDVGVNDNAGAKAGLTLVLYLIIKAKHMNADTDYSIAEAAFNKGETAMTINGPWAWNSNIDT

      240          260          280          300
      |           |           |           |
MBP-WT SKVNYGVTVLPTFKGQPSKPFVGVLSAGINAASPNKELAKEFLENYLLTDEGLEAVNKDKPLGAVALKSYEEELAKDPR
MBP-1.1 SKVNYGVTVLPTFKGQPSKPFVGVLSAGINAASPNKELAKEFLENYLLTDEGLEAVNKDKPLGAVALKSYEEELAKDPR
MBP-1.2 SKVNYGVTVLPTFKGQPSKPFVGVLSAGINAASPNKELAKEFLENYLLTDEGLEAVNKDKPLGAVALKSYEEELAKDPR
MBP-1.3 SKVNYGVTVLPTFKGQPSKPFVGVLSAGINAASPNKELAKEFLENYLLTDEGLEAVNKDKPLGAVALKSYEEELAKDPR
MBP-1.4 SKVNYGVTVLPTFKGQPSKPFVGVLSAGINAASPNKELAKEFLENYLLTDEGLEAVNKDKPLGAVALKSYEEELAKDPR
MBP-2.5 SKVNYGVTVLPTFKGQPSKPFVGVLSAGINAASPNKELAKEFLENYLLTDEGLEAVNKDKPLGAVALKSYEEELAKDPR
MBP-3.6 SKVNYGVTVLPTFKGQPSKPFVGVLSAGINAASPNKELAKEFLENYLLTDEGLEAVNKDKPLGAVALKSYEEELAKDPR

      320          340          360
      |           |           |
MBP-WT IAATMENAQKGEIMPNI PQMSAFWYAVRTAVINAASGRQTVDEALKDAQTRITK
MBP-1.1 IAATMENAQKGEIMPNI PQMSAFWYAVRTAVINAASG
MBP-1.2 IAATMENAQKGEIMPNI PQMSAFWYAVRTAVINAASG
MBP-1.3 IAATMENAQKGEIMPNI PQMSAFWYAVRTAVINAASG
MBP-1.4 IAATMENAQKGEIMPNI PQMSAFWYAVRTAVINAASG
MBP-2.5 IAATMENAQKGEIMPNI PQMSAFWYAVRTAVINAASGRQTVDEALKDAQTRITK
MBP-3.6 IAATMENAQKGEIMPNI PQMSAFWYAVRTAVINAASGRQTVDEALKDAQTRITK

```

**AR**

|               |          |          |         |          |                   |
|---------------|----------|----------|---------|----------|-------------------|
|               | 12       | 31       | 51      | 71       |                   |
| <b>AR-WT</b>  |          |          |         |          |                   |
| <b>AR-1.1</b> | SDLGRKLL | EAARAGQD | DEVRI   | LMANGADV | NAADNTGTTPLHLAAYS |
| <b>AR-1.2</b> | SDLGRKLL | EAARAGQD | DEVRI   | LMANGADV | NAADNTGTTPLHLAAYS |
| <b>AR-1.3</b> | SDLGRKLL | EAARAGQD | DEVRI   | LMANGADV | NAADNTGTTPLHLAAYS |
| <b>AR-1.4</b> | SDLGRKLL | EAARAGQD | DEVRI   | LMANGADV | NAADNTGTTPLHLAAYS |
| <b>AR-2.5</b> | SDLGRKLL | EAARAGQD | DEVRI   | LMANGADV | NAADNTGTTPLHLAAYS |
| <b>AR-2.6</b> | SDLGRKLL | EAARAGQD | DEVRI   | LMANGADV | NAADNTGTTPLHLAAYS |
| <b>AR-2.7</b> | SDLGRKLL | EAARAGQD | DEVRI   | LMANGADV | NAADNTGTTPLHLAAYS |
| <b>AR-3.8</b> | SDLGRKLL | EAARAGQD | DEVRI   | LMANGADV | NAADNTGTTPLHLAAYS |
|               | 91       | 111      | 131     | 151      |                   |
| <b>AR-WT</b>  |          |          |         |          |                   |
| <b>AR-1.1</b> | GHLEIVEV | LKNGADV  | NAMSDG  | MTPLHLAA | KWGYLEI           |
| <b>AR-1.2</b> | GHLEIVEV | LKNGADV  | NAMSDG  | MTPLHAAA | YFGYLEI           |
| <b>AR-1.3</b> | GHLEIVEV | LKNGADV  | NAMSDG  | MTPLHAAA | WFGYLEI           |
| <b>AR-1.4</b> | GHLEIVEV | LKNGADV  | NAMTSDG | WTPHLAAA | YFGYLEI           |
| <b>AR-2.5</b> | GHLEIVEV | LKNGEDV  | NAMSDG  | WTPHLAAA | WFGYLEI           |
| <b>AR-2.6</b> | GHLEIVEV | LKNGEDV  | NAMSDG  | WTPHLAAA | WFGYLEI           |
| <b>AR-2.7</b> | GHLEIVEV | LKNGEDV  | NAMSDG  | WTPHLAAA | KFGYLEI           |
| <b>AR-3.8</b> | GHLEIVEV | LKNGEDV  | NAMSDG  | WTPHLAAA | KFGYLEI           |
|               |          |          |         |          | VEVLLKHG          |
|               |          |          |         |          | ADVNAQDK          |
|               |          |          |         |          | RGKTA             |
|               |          |          |         |          | FDVSI             |
|               |          |          |         |          | DNGNE             |
|               |          |          |         |          | DLAEI             |
|               |          |          |         |          | LQKLN             |

**Fig. S1. Sequence alignments of designed proteins (Table S1).** Residues that are different from the wild-type scaffold are highlighted, and motif residues are highlighted in yellow and boxed. Computationally predicted mutations for original designs are in magenta, stability-enhancing mutations from Kramer *et al.*(31) are in dark gray, mutations from error-prone PCR are in light grey, mutations from saturation mutagenesis are in orange, computationally predicted stabilizing mutations are in purple, and the computationally predicted reversion mutation is in blue.

**Figure S2**

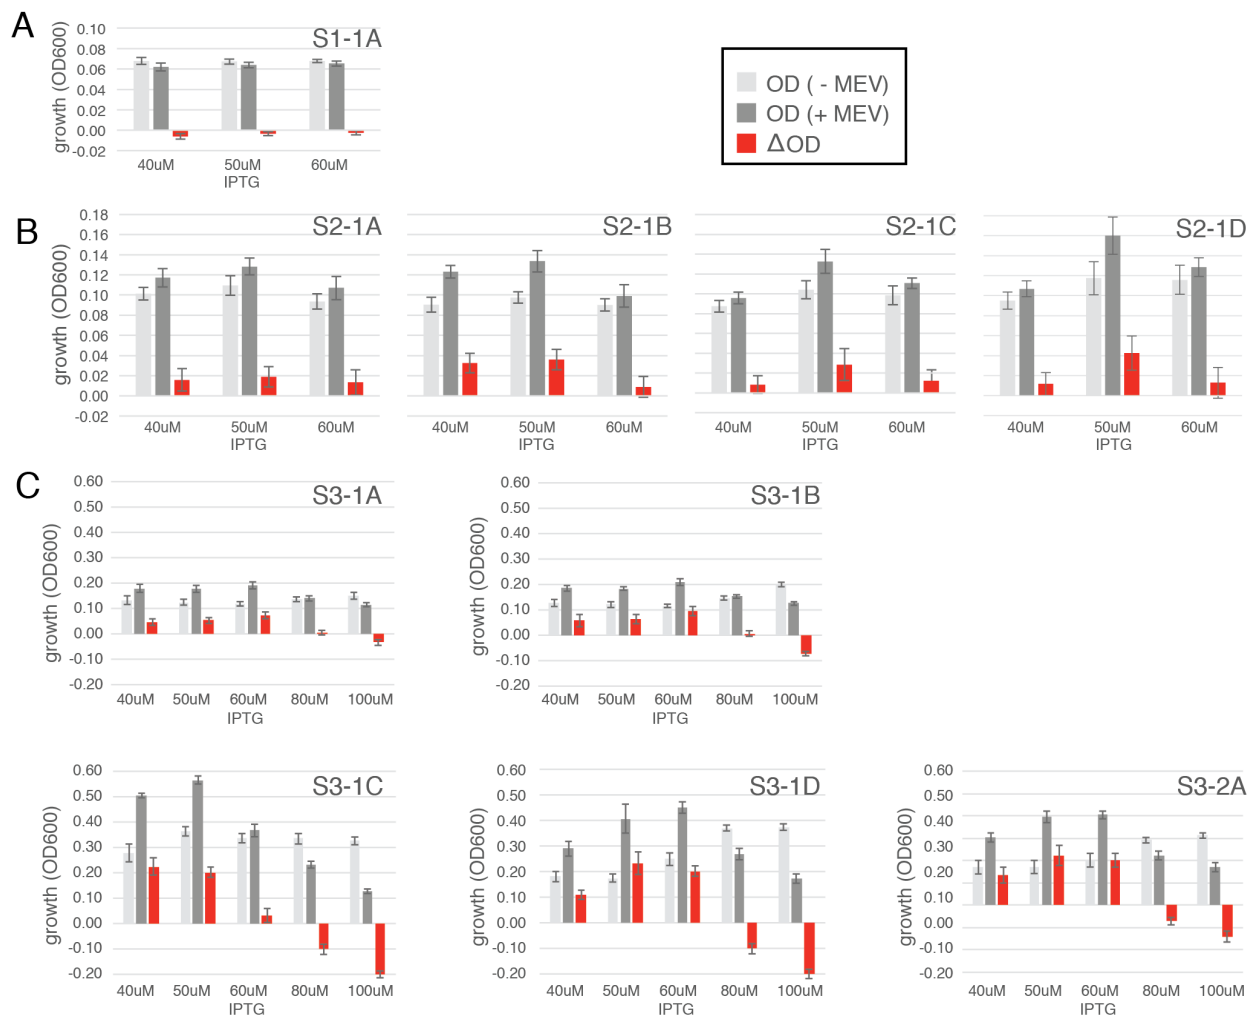

**Fig. S2. Growth +/- 5 mM mevalonate and change in growth for data shown in Figure 2C.** (A) Sensor design for scaffold 1 (FRB/FKBP). (B) Sensor designs for scaffold 2 (RapF/ComA). (C) Sensor designs for scaffold 3 (AR/MBP). Change in growth is dependent on IPTG concentration (panel C) as expected, where at high induction levels split mDHFR is complemented independent of mevalonate, and adding mevalonate leads to a growth disadvantage because of production of toxic metabolites (IPP, DMAP, and FPP). **Figure 2C** shows data at 50  $\mu$ M IPTG. Experimental conditions: 0.4% L-arabinose, 1  $\mu$ g/mL TMP, 35°C. Error bars are the standard deviation from at least 4 biological replicates and 8 replicates for each biological replicate.

Note that S3-2A, which contains two mutations introduced by error-prone PCR and was identified by library screening using the split mDHFR reporter, behaves similarly (except for a slight shift in



the effect of IPTG concentration) to the original computational design S3-1C, which has an identical sequence without the two error-prone PCR mutations (**Fig. 2A, Fig. S5**).

Designs for scaffolds 1 (panel A) and 2 (panel B) failed to give a robust signaling response. In general, designs could fail because (i) even though the designs dimerize, they do not properly reconstitute the split reporter (for example linkage between sensor and reporter components is problematic), (ii) the designs do not express at sufficient concentrations, are not properly folded, or a combination of both, or (iii) the designs express sufficiently and are folded but there is no or insufficient binding to the small molecule ligand across the complex interface. Scaffold 1 has been used extensively as rapamycin-induced signaling system linked to a variety of different outputs(73), so (ii) or (iii) are more likely reasons for failure. The designs for scaffold 2 show a weak but reproducible response to FPP, so the designs are either expressed at too low levels under our conditions, display only weak ligand binding, or both. A more detailed analysis would be required to dissect the failure modes more precisely.

**Figure S3**

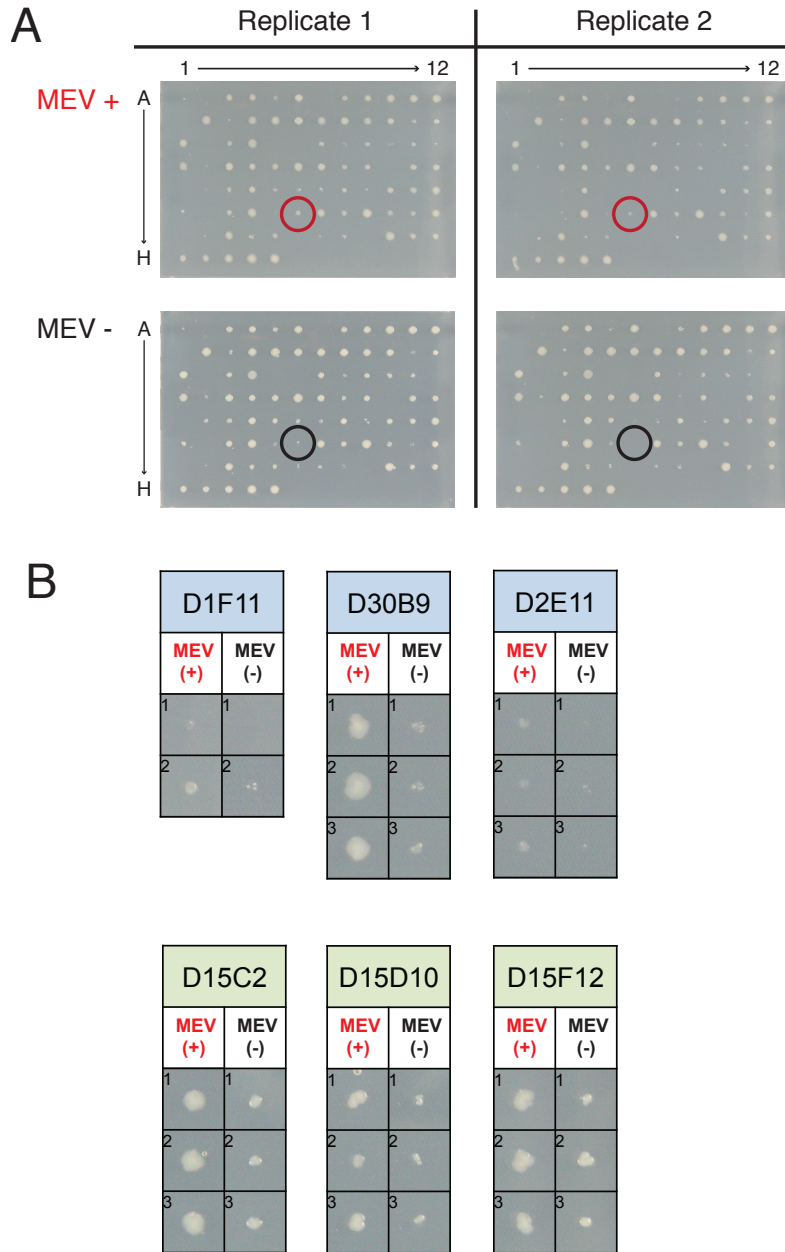

**Fig. S3. Example data from library screening using a colony-printing assay. (A)** Comparison of growth in the presence (top) and absence (bottom) of 5 mM mevalonate for two replicates. A colony growing better with mevalonate is circled in the replicates. **(B)** Examples of two to three replicates for library hits (concatenated from different plates). Experimental conditions: 0.4 % L-arabinose, 6  $\mu$ g/mL TMP, 100  $\mu$ M IPTG. Top row: hits from library 2; bottom row: hits from library 1.

Figure S4

MBP

|                   |               |           |           |            |
|-------------------|---------------|-----------|-----------|------------|
|                   | 1             | 20        | 40        | 60         |
| <b>MBP-WT</b>     | KIEEGKLV      | IWINGDKGY | NGLAEV    | GKKFEKDTG  |
| <b>MBP-D2B1</b>   | KIEEGKLV      | IWINGDKGY | NGLAEV    | GKKFEKDTG  |
| <b>MBP-D4A2</b>   | KIEEGKLV      | IWINGDKGY | NGLAEV    | GKKFEKDTG  |
| <b>MBP-D11C1</b>  | KIEEGKLV      | IWINGDKGY | NGLAEV    | GKKFEKDTG  |
| <b>MBP-D13E6</b>  | KIEEGKLV      | IWINGDKGY | NGLAEV    | GKKFEKDTG  |
| <b>MBP-D15C2</b>  | KIEEGKLV      | IWINGDKGY | NGLAEV    | GKKFEKDTG  |
| <b>MBP-D15D10</b> | KIEEGKLV      | IWINGDKGY | NGLAEV    | GKKFEKDTG  |
| <b>MBP-D15F12</b> | KIEEGKLV      | IWINGDKGY | NGLAEV    | GKKFEKDTG  |
|                   | 80            | 100       | 120       | 140        |
| <b>MBP-WT</b>     | TPDKAFQDKLYP  | PFTWD     | AVRYNGKLI | AYPIAVEALS |
| <b>MBP-D2B1</b>   | TPDKAFQDKLYP  | PFTWD     | AVRYNGKLI | AYPIAVEALS |
| <b>MBP-D4A2</b>   | TPDKAFQDKLYP  | PFTWD     | AVRYNGKLI | AYPIAVEALS |
| <b>MBP-D11C1</b>  | TPDKAFQDKLYP  | PFTWD     | AVRYNGKLI | AYPIAVEALS |
| <b>MBP-D13E6</b>  | TPDKAFQDKLYP  | PFTWD     | AVRYNGKLI | AYPIAVEALS |
| <b>MBP-D15C2</b>  | TPDKAFQDKLYP  | PFTWD     | AVRYNGKLI | AYPIAVEALS |
| <b>MBP-D15D10</b> | TPDKAFQDKLYP  | PFTWD     | AVRYNGKLI | AYPIAVEALS |
| <b>MBP-D15F12</b> | TPDKAFQDKLYP  | PFTWD     | AVRYNGKLI | AYPIAVEALS |
|                   | 160           | 180       | 200       | 220        |
| <b>MBP-WT</b>     | PLIAADGGYAFKY | ENGYDIKDV | GVNDNAGAK | AGLTF      |
| <b>MBP-D2B1</b>   | PLIAADGGYAFKY | ENGYDIKDV | GVNDNAGAK | AGLTF      |
| <b>MBP-D4A2</b>   | PLIAADGGYAFKY | ENGYDIKDV | GVNDNAGAK | AGLTF      |
| <b>MBP-D11C1</b>  | PLIAADGGYAFKY | ENGYDIKDV | GVNDNAGAK | AGLTF      |
| <b>MBP-D13E6</b>  | PLIAADGGYAFKY | ENGYDIKDV | GVNDNAGAK | AGLTF      |
| <b>MBP-D15C2</b>  | PLIAADGGYAFKY | ENGYDIKDV | GVNDNAGAK | AGLTF      |
| <b>MBP-D15D10</b> | PLIAADGGYAFKY | ENGYDIKDV | GVNDNAGAK | AGLTF      |
| <b>MBP-D15F12</b> | PLIAADGGYAFKY | ENGYDIKDV | GVNDNAGAK | AGLTF      |
|                   | 240           | 260       | 280       | 300        |
| <b>MBP-WT</b>     | SKVNYGVT      | VLPTFKGQ  | PSKPFV    | GVLSAGINA  |
| <b>MBP-D2B1</b>   | SKVNYGVT      | VLPTFKGQ  | PSKPFV    | GVLSAGINA  |
| <b>MBP-D4A2</b>   | SKVNYGVT      | VLPTFKGQ  | PSKPFV    | GVLSAGINA  |
| <b>MBP-D11C1</b>  | SKVNYGVT      | VLPTFKGQ  | PSKPFV    | GVLSAGINA  |
| <b>MBP-D13E6</b>  | SKVNYGVT      | VLPTFKGQ  | PSKPFV    | GVLSAGINA  |
| <b>MBP-D15C2</b>  | SKVNYGVT      | VLPTFKGQ  | PSKPFV    | GVLSAGINA  |
| <b>MBP-D15D10</b> | SKVNYGVT      | VLPTFKGQ  | PSKPFV    | GVLSAGINA  |
| <b>MBP-D15F12</b> | SKVNYGVT      | VLPTFKGQ  | PSKPFV    | GVLSAGINA  |
|                   | 320           | 340       |           |            |
| <b>MBP-WT</b>     | IAATMENAQK    | GEIMPNI   | PQMSAFWY  | AVRTAVINAA |
| <b>MBP-D2B1</b>   | IAATMENAQK    | GEIMPNI   | PQMSAFWY  | AVRTAVINAA |
| <b>MBP-D4A2</b>   | IAATMENAQK    | GEIMPNI   | PQMSAFWY  | AVRTAVINAA |
| <b>MBP-D11C1</b>  | IAATMENAQK    | GEIMPNI   | PQMSAFWY  | AVRTAVINAA |
| <b>MBP-D13E6</b>  | IAATMENAQK    | GEIMPNI   | PQMSAFWY  | AVRTAVINAA |
| <b>MBP-D15C2</b>  | IAATMENAQK    | GEIMPNI   | PQMSAFWY  | AVRTAVINAA |
| <b>MBP-D15D10</b> | IAATMENAQK    | GEIMPNI   | PQMSAFWY  | AVRTAVINAA |
| <b>MBP-D15F12</b> | IAATMENAQK    | GEIMPNI   | PQMSAFWY  | AVRTAVINAA |

## AR

|                  |          |          |       |          |          |          |          |          |
|------------------|----------|----------|-------|----------|----------|----------|----------|----------|
|                  | 12       |          | 31    |          | 51       |          | 71       |          |
| <b>AR-WT</b>     |          |          |       |          |          |          |          |          |
| <b>AR-D2B1</b>   | SDLGRKLL | EAARAGQD | DEVRI | LMANGADV | NAADNTGT | TPHLAAY  | SGHLEI   | VEVLLKHG |
| <b>AR-D4A2</b>   | SDLGRKLL | EAARAGQD | DEVRI | LMANGADV | NAADNTGT | TPHLAAY  | SGHPEI   | VEVLLKHG |
| <b>AR-D11C1</b>  | SDLGRKLL | EAARAGQD | DEVRI | LMANGADV | NAADNTGT | TPHLAAY  | SGHLEI   | VEVLLKHG |
| <b>AR-D13E6</b>  | SDLGRKLL | EAARAGQD | DEVRI | LMANGADV | NAADNTGT | TPHLAAY  | SGHLEI   | VEVLLKHG |
| <b>AR-D15C2</b>  | SDLGRKLL | EAARAGQD | DEVRI | LMANGADV | NAADNTGT | TPHLAAY  | SGHLEI   | VEVLLKHG |
| <b>AR-D15D10</b> | SDLGRKLL | EAARAGQD | DEVRI | LMANGADV | NAADNTGT | TPHLAAY  | SGHLEI   | VEVLLKHG |
| <b>AR-D15F12</b> | SDLGRKLL | EAARAGQD | DEVRI | LMANGADV | NAADNTGT | TPHLAAY  | SGHLEI   | VEVLLKHG |
|                  |          |          |       |          |          |          |          |          |
|                  | 91       |          | 111   |          | 131      |          | 151      |          |
| <b>AR-WT</b>     |          |          |       |          |          |          |          |          |
| <b>AR-D2B1</b>   | GHLEI    | VEVLLKNG | ADV   | NAMSDG   | MTPLHLAA | KWGYLEI  | VEVLLKHG | ADV      |
| <b>AR-D4A2</b>   | GHLEI    | VEVLLKNG | ADV   | NAMSDG   | WTPLHAA  | AVLGYLEI | VEVLLKHG | ADV      |
| <b>AR-D11C1</b>  | GHLEI    | VEVLLKNG | ADV   | NAMSDG   | WTPLHAA  | ADAGYLEI | VEVLLKHG | ADV      |
| <b>AR-D13E6</b>  | GHLEI    | VEVLLKNG | ADV   | NAMSDG   | WTPLHAA  | ASYGYLEI | VEVLLKHG | ADV      |
| <b>AR-D15C2</b>  | GHLEI    | VEVLLKNG | ADV   | NAMSDG   | WTPLHAA  | AVVGYLEI | VEVLLKHG | ADV      |
| <b>AR-D15D10</b> | GHLEI    | VEVLLKNG | ADV   | NAMSDG   | WTPLHAA  | ADEGYLEI | VEVLLKHG | ADV      |
| <b>AR-D15F12</b> | GHLEI    | VEVLLKNG | ADV   | NAMSDG   | WTPLHAA  | AYYGYLEI | VEVLLKHG | ADV      |

**Fig. S4. Sequence alignments of hits from the computationally designed S3 library.** These variants were identified using a plate-based split mDHFR assay (Fig. S3) and validated by individual solution growth assays (Methods). Residues different from the WT scaffold are highlighted in magenta, and motif residues are highlighted in yellow and boxed.

Figure S5

MBP

1 20 40 60  
MBP-WT KIEEGKLVIIWINGDKGYNGLAEVGGKFEKDTGIKVTVEHPDKLEEKFPQVAATGDGPDIIFWAHDRFGGYAQSGLLAEI  
MBP-D1F11 KIEEGKLVIIWINGDKGYNGLAEVGGKFEKDTGIKVTVEHPDKLEEKFPQVAATGDGPDIIFWAHDRFGGYAQSGLLAEI  
MBP-D2E11 KIEEGKLVIIWINGDKGYNGLAEVGGKFEKDTGIKVTVEHPDKLEEKFPQVAATGDGPDIIFWAHDRFGGYAQSGLLAEI  
MBP-D23E3 KIEEGKLVIIWINGDKGYNGLAEVGGKFEKDTGIKVTVEHPDKLEEKFPQVAATGDGPDIIFWAHDRFGGYAQSGLLAEI  
MBP-D26B5 KIEEGKLVIIWINGDKGYNGLAEVGGKFEKDTGIKVTVEHPDKLEEKFPQVAATGDGPDIIFWAHDRFGGYAQSGLLAEI  
MBP-D28D9 KIEEGKLVIIWINGDKGYNGLAEVGGKFEKDTGIKVTVEHPDKLEEKFPQVAATGDGPDIIFWAHDRFGGYAQSGLLAEI  
MBP-D28H1 KIEEGKLVIIWINGDKGYNGLAEVGGKFEKDTGIKVTVEHPDKLEEKFPQVAATGDGPDIIFWAHDRFGGYAQSGLLAEI  
MBP-D29F4 KIEEGKLVIIWINGDKGYNGLAEVGGKFEKDTGIKVTVEHPDKLEEKFPQVAATGDGPDIIFWAHDRFGGYAQSGLLAEI  
MBP-D30B9 KIEEGKLVIIWINGDKGYNGLAEVGGKFEKDTGIKVTVEHPDKLEEKFPQVAATGDGPDIIFWAHDRFGGYAQSGLLAEI  
MBP-D30F9 KIEEGKLVIIWINGDKGYNGLAEVGGKFEKDTGIKVTVEHPDKLEEKFPQVAATGDGPDIIFWAHDRFGGYAQSGLLAEI  
MBP-D31D9 KIEEGKLVIIWINGDKGYNGLAEVGGKFEKDTGIKVTVEHPDKLEEKFPQVAATGDGPDIIFWAHDRFGGYAQSGLLAEI  
MBP-D31E8 KIEEGKLVIIWINGDKGYNGLAEVGGKFEKDTGIKVTVEHPDKLEEKFPQVAATGDGPDIIFWAHDRFGGYAQSGLLAEI

80 100 120 140  
MBP-WT TPDKAFQDKLYPFTWDVAVRYNGKLIAYPIAVEALS LIYKNDLLPNPPKTWEEIFALDKELKAKGKSALMFNLQEPYFTW  
MBP-D1F11 TPDKAFQDKLYPFTWDVAVRYNGKLIAYPIAVEALS LIYKNDLLPNPPKTWEEIFALDKELKAKGKSALMFNLQEPYFTW  
MBP-D2E11 TPDKAFQDKLYPFTWDVAVRYNGKLIAYPIAVEALS LIYKNDLLPNPPKTWEEIFALDKELKAKGKSALMFNLQEPYFTW  
MBP-D23E3 TPDKAFQDKLYPFTWDVAVRYNGKLIAYPIAVEALS LIYKNDLLPNPPKTWEEIFALDKELKAKGKSALMFNLQEPYFTW  
MBP-D26B5 TPDKAFQDKLYPFTWDVAVRYNGKLIAYPIAVEALS LIYKNDLLPNPPKTWEEIFALDKELKAKGKSALMFNLQEPYFTW  
MBP-D28D9 TPDKAFQDKLYPFTWDVAVRYNGKLIAYPIAVEALS LIYKNDLLPNPPKTWEEIFALDKELKAKGKSALMFNLQEPYFTW  
MBP-D28H1 TPDKAFQDKLYPFTWDVAVRYNGKLIAYPIAVEALS LIYKNDLLPNPPKTWEEIFALDKELKAKGKSALMFNLQEPYFTW  
MBP-D29F4 TPDKAFQDKLYPFTWDVAVRYNGKLIAYPIAVEALS LIYKNDLLPNPPKTWEEIFALDKELKAKGKSALMFNLQEPYFTW  
MBP-D30B9 TPDKAFQDKLYPFTWDVAVRYNGKLIAYPIAVEALS LIYKNDLLPNPPKTWEEIFALDKELKAKGKSALMFNLQEPYFTW  
MBP-D30F9 TPDKAFQDKLYPFTWDVAVRYNGKLIAYPIAVEALS LIYKNDLLPNPPKTWEEIFALDKELKAKGKSALMFNLQEPYFTW  
MBP-D31D9 TPDKAFQDKLYPFTWDVAVRYNGKLIAYPIAVEALS LIYKNDLLPNPPKTWEEIFALDKELKAKGKSALMFNLQEPYFTW  
MBP-D31E8 TPDKAFQDKLYPFTWDVAVRYNGKLIAYPIAVEALS LIYKNDLLPNPPKTWEEIFALDKELKAKGKSALMFNLQEPYFTW

160 180 200 220  
MBP-WT PLIAADGGYAFKYENGYDIKDVGVNAGAKAGLTLFLVLDLIKKNHMNADTDYSIAEAAFNKGETAMTINGPWAWSNIDT  
MBP-D1F11 PLIAADGGYAFKYENGYDIKDVGVNAGAKAGLTLRLVYLIAAKAMNADTDYSIAEAAFNKGETAMTINGPWAWSNIDT  
MBP-D2E11 PLIAADGGYAFKYENGYDIKDVGVNAGAKAGLTLRLVYLIAAKAMNADTDYSIAEAAFNKGETAMTINGPWAWSNIDT  
MBP-D23E3 PLIAADGGYAFKYENGYDIKDVGVNAGAKAGLTLRLVYLIAAKAMNADTDYSIAEAAFNKGETAMTINGPWAWSNIDT  
MBP-D26B5 PLIAADGGYAFKYENGYDIKDVGVNAGAKAGLTLRLVYLIAAKAMNADTDYSIAEAAFNKGETAMTINGPWAWSNIDT  
MBP-D28D9 PLIAADGGYAFKYENGYDIKDVGVNAGAKAGLTLRLVYLIAAKAMNADTDYSIAEAAFNKGETAMTINGPWAWSNIDT  
MBP-D28H1 PLIAADGGYAFKYENGYDIKDVGVNAGAKAGLTLRLVYLIAAKAMNADTDYSIAEAAFNKGETAMTINGPWAWSNIDT  
MBP-D29F4 PLIAADGGYAFKYENGYDIKDVGVNAGAKAGLTLRLVYLIAAKAMNADTDYSIAEAAFNKGETAMTINGPWAWSNIDT  
MBP-D30B9 PLIAADGGYAFKYENGYDIKDVGVNAGAKAGLTLFLVALIAAKAMNADTDYSIAEAAFNKGETAMTINGPWAWSNIDT  
MBP-D30F9 PLIAADGGYAFKYENGYDIKDVGVNAGAKAGLTLRLVYLIAAKAMNADTDYSIAEAAFNKGETAMTINGPWAWSNIDT  
MBP-D31D9 PLIAADGGYAFKYENGYDIKDVGVNAGAKAGLTLRLVYLIAAKAMNADTDYSIAEAAFNKGETAMTINGPWAWSNIDT  
MBP-D31E8 PLIAADGGYAFKYENGYDIKDVGVNAGAKAGLTLRLVYLIAAKAMNADTDYSIAEAAFNKGETAMTINGPWAWSNIDT

240 260 280 300  
MBP-WT SKVNYGVTVLPTFKGQPSKPFVGVLSAGINAASPNKELAKEFLENYLLTDEGLEAVNKDKPLGAVALKSYEEELAKDPR  
MBP-D1F11 SKVNYGVTVLPTFKGQPSKPFVGVLSAGINAASPNKELAKEFLENYLLTDEGLEAVNKDKPLGAVALKSYEEELAKDPR  
MBP-D2E11 SKVNYGVTVLPTFKGQPSKPFVGVLSAGINAASPNKELAKEFLENYLLTDEGLEAVNKDKPLGAVALKSYEEELAKDPR  
MBP-D23E3 SKVNYGVTVLPTFKGQPSKPFVGVLSAGINAASPNKELAKEFLENYLLTDEGLEAVNKDKPLGAVALKSYEEELAKDPR  
MBP-D26B5 SKVNYGVTVLPTFKGQPSKPFVGVLSAGINAASPNKELAKEFLENYLLTDEGLEAVNKDKPLGAVALKSYEEELAKDPR  
MBP-D28D9 SKVNYGVTVLPTFKGQPSKPFVGVLSAGINAASPNKELAKEFLENYLLTDEGLEAVNKDKPLGAVALKSYEEELAKDPR  
MBP-D28H1 SKVNYGVTVLPTFKGQPSKPFVGVLSAGINAASPNKELAKEFLENYLLTDEGLEAVNKDKPLGAVALKSYEEELAKDPR  
MBP-D29F4 SKVNYGVTVLPTFKGQPSKPFVGVLSAGINAASPNKELAKEFLENYLLTDEGLEAVNKDKPLGAVALKSYEEELAKDPR  
MBP-D30B9 SKVNYGVTVLPTFKGQPSKPFVGVLSAGINAASPNKELAKEFLENYLLTDEGLEAVNKDKPLGAVALKSYEEELAKDPR  
MBP-D30F9 SKVNYGVTVLPTFKGQPSKPFVGVLSAGINAASPNKELAKEFLENYLLTDEGLEAVNKDKPLGAVALKSYEEELAKDPR  
MBP-D31D9 SKVNYGVTVLPTFKGQPSKPFVGVLSAGINAASPNKELAKEFLENYLLTDEGLEAVNKDKPLGAVALKSYEEELAKDPR  
MBP-D31E8 SKVNYGVTVLPTFKGQPSKPFVGVLSAGINAASPNKELAKEFLENYLLTDEGLEAVNKDKPLGAVALKSYEEELAKDPR

320 340  
MBP-WT IAATMENAQKGEIMPNI PQMSAFWYAVRTAVINAA  
MBP-D1F11 IAATMENAQKGEIMPNI PQMSAFWYAVRTAVINAA  
MBP-D2E11 IAATMENAQKGEIMPNI PQMSAFWYAVRTAVINAA  
MBP-D23E3 IAATMENAQKGEIMPNI PQMSAFWYAVRTAVINAA  
MBP-D26B5 IAATMENAQKGEIMPNI PQMSAFWYAVRTAVINAA  
MBP-D28D9 IAATMENAQKGEIMPNI PQMSAFWYAVRTAVINAA  
MBP-D28H1 IAATMENAQKGEIMPNI PQMSAFWYAVRTAVINAA  
MBP-D29F4 IAATMENAQKGEIMPNI PQMSAFWYAVRTAVINAA  
MBP-D30B9 IAATMENAQKGEIMPNI PQMSAFWYAVRTAVINAA  
MBP-D30F9 IAATMENAQKGEIMPNI PQMSAFWYAVRTAVINAA  
MBP-D31D9 IAATMENAQKGEIMPNI PQMSAFWYAVRTAVINAA  
MBP-D31E8 IAATMENAQKGEIMPNI PQMSAFWYAVRTAVINAA

## AR

|          |                         |                                  |       |      |                             |
|----------|-------------------------|----------------------------------|-------|------|-----------------------------|
|          | 12                      | 31                               | 51    | 71   |                             |
| AR-WT    |                         |                                  |       |      |                             |
| AR-D1F11 | SDLGRKLL                | EAA                              | RAGQD | DEV  | RILMANGADVNAADNTGTTPLHLAAYS |
| AR-D2E11 | SDLGRKLL                | EAA                              | RAGQD | DEV  | RILMANGADVNAADNTGTTPLHLAAYS |
| AR-D23E3 | SDLGRKLL                | EAA                              | RAGQD | DEV  | RILMANGADVNAADNTGTTPLHLAAYS |
| AR-D26B5 | SDLGRKLL                | EAA                              | RAGQD | DEV  | RILMANGADVNAADNTGTTPLHLAAYS |
| AR-D28D9 | SDLGRKLL                | EAA                              | RAGQD | DEV  | RILMANGADVNAADNTGTTPLHLAAYS |
| AR-D28H1 | SDLGRKLL                | EAA                              | RAGQD | DEV  | RILMANGADVNAADNTGTTPLHLAAYS |
| AR-D29F4 | SDLGRKLL                | EAA                              | RAGQD | DEV  | RILMANGADVNAADNTGTTPLHLAAYS |
| AR-D30B9 | SDLGRKLL                | EAA                              | RAGQD | DEV  | RILMANGADVNAADNTGTTPLHLAAYS |
| AR-D30F9 | SDLGRKLL                | EAA                              | RAGQD | DEV  | RILMANGADVNAADNTGTTPLHLAAYS |
| AR-D31D9 | SDLGRKLL                | EAA                              | RAGQD | DEV  | RILMANGADVNAADNTGTTPLHLAAYS |
| AR-D31E8 | SDLGRKLL                | EAA                              | RAGQD | DEV  | RILMANGADVNAADNTGTTPLHLAAYS |
|          | 91                      | 111                              | 131   | 151  |                             |
| AR-WT    |                         |                                  |       |      |                             |
| AR-D1F11 | GHLEIVEVLLKNGADVNAMGSDG | MTPLHAAAWFGYLEIVEVLLKNGADVNAQDKR | FGKTA | FDES | SIDNGNEDLAEIILQKLN          |
| AR-D2E11 | GHLEIVEVLLKNGEDVNAMGSDG | WTPLHAAAWFGYLEIVEVLLKNGADVNAQDKR | FGKTA | FDES | SIDNGNEDLAEIILQKLN          |
| AR-D23E3 | GHLEIVEVLLKNGADVNAMGSDG | WTPLHAAAWFGYLEIVEVLLKNGADVNAQDKR | FGKTA | FDES | SIDNGNEDLAEIILQKLN          |
| AR-D26B5 | GHLEIVEVLLKNGADVNAMGSDG | WTPLHAAAWFGYLEIVEVLLKNGADVNAQDKR | FGKTA | FDES | SIDNGNEDLAEIILQKLN          |
| AR-D28D9 | GHLEIVEVLLKNGADVNAMGSDG | WTPLHAAAWFGYLEIVEVLLKNGADVNAQDKR | FGKTA | FDES | SIDNGNEDLAEIILQKLN          |
| AR-D28H1 | GHLEIVEVLLKNGADVNAMGSDG | WTPLHAAAWFGYLEIVEVLLKNGADVNAQDKR | FGKTA | FDES | SIDNGNEDLAEIILQKLN          |
| AR-D29F4 | GHLEIVEVLLKNGADVNAMGSDG | WTPLHAAAWFGYLEIVEVLLKNGADVNAQDKR | FGKTA | FDES | SIDNGNEDLAEIILQKLN          |
| AR-D30B9 | GHLEIVEVLLKNGADVNAMGSDG | WTPLHAAAWFGYLEIVEVLLKNGADVNAQDKR | FGKTA | FDES | SIDNGNEDLAEIILQKLN          |
| AR-D30F9 | GHLEIVEVLLKNGADVNAMGSDG | WTPLHAAAWFGYLEIVEVLLKNGADVNAQDKR | FGKTA | FDES | SIDNGNEDLAEIILQKLN          |
| AR-D31D9 | GHLEIVEVLLKNGADVNAMGSDG | WTPLHAAAWFGYLEIVEVLLKNGADVNAQDKR | FGKTA | FDES | SIDNGNEDLAEIILQKLN          |
| AR-D31E8 | GHLEIVEVLLKNGADVNAMGSDG | WTPLHAAAWFGYLEIVEVLLKNGADVNAQDKR | FGKTA | FDES | SIDNGNEDLAEIILQKLN          |

**Fig. S5. Sequence alignments of hits from the error-prone PCR S3 library.** These variants were identified using a plate-based split mDHFR assay (Fig. S3) and validated by individual solution growth assays (Methods). Residues different from the WT scaffold are highlighted in magenta, and motif residues are highlighted in yellow and boxed.

**Figure S6**

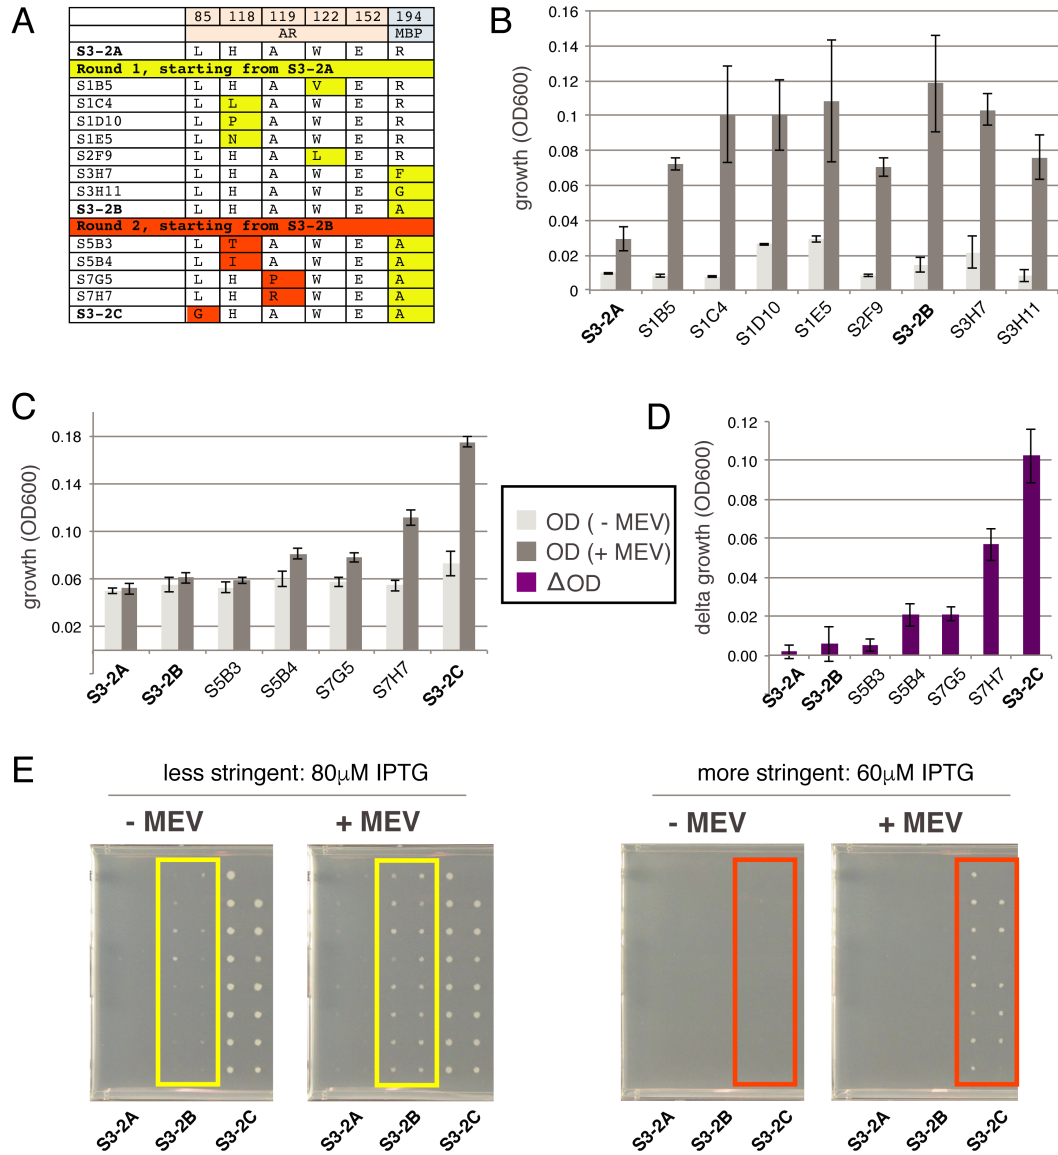

**Fig. S6. Data from the single-site saturation mutagenesis screen. (A)** Sequences of hits at screened positions. **(B)** Validation of hits from round 1 (starting from S3-2A) with the split mDHFR assay in liquid culture. **(C)** Validation of hits from round 2 (starting from S3-2B) with split mDHFR assay in liquid culture. **(D)** Sensor signal (change in growth as measured by OD<sub>600</sub>) from round 2. **(E)** Split mDHFR plate assay showing that sensors S3-2B and S3-2C function under more stringent conditions (lower IPTG inducer concentration). Experimental conditions: Round 1 (panel B): cultures grown with 80  $\mu$ M IPTG at 35  $^{\circ}$ C,  $n=3$ . Round 2: (panels C, D): cultures grown with 60  $\mu$ M IPTG at 35  $^{\circ}$ C,  $n=4$ . Error bars reflect standard deviation.

Figure S7

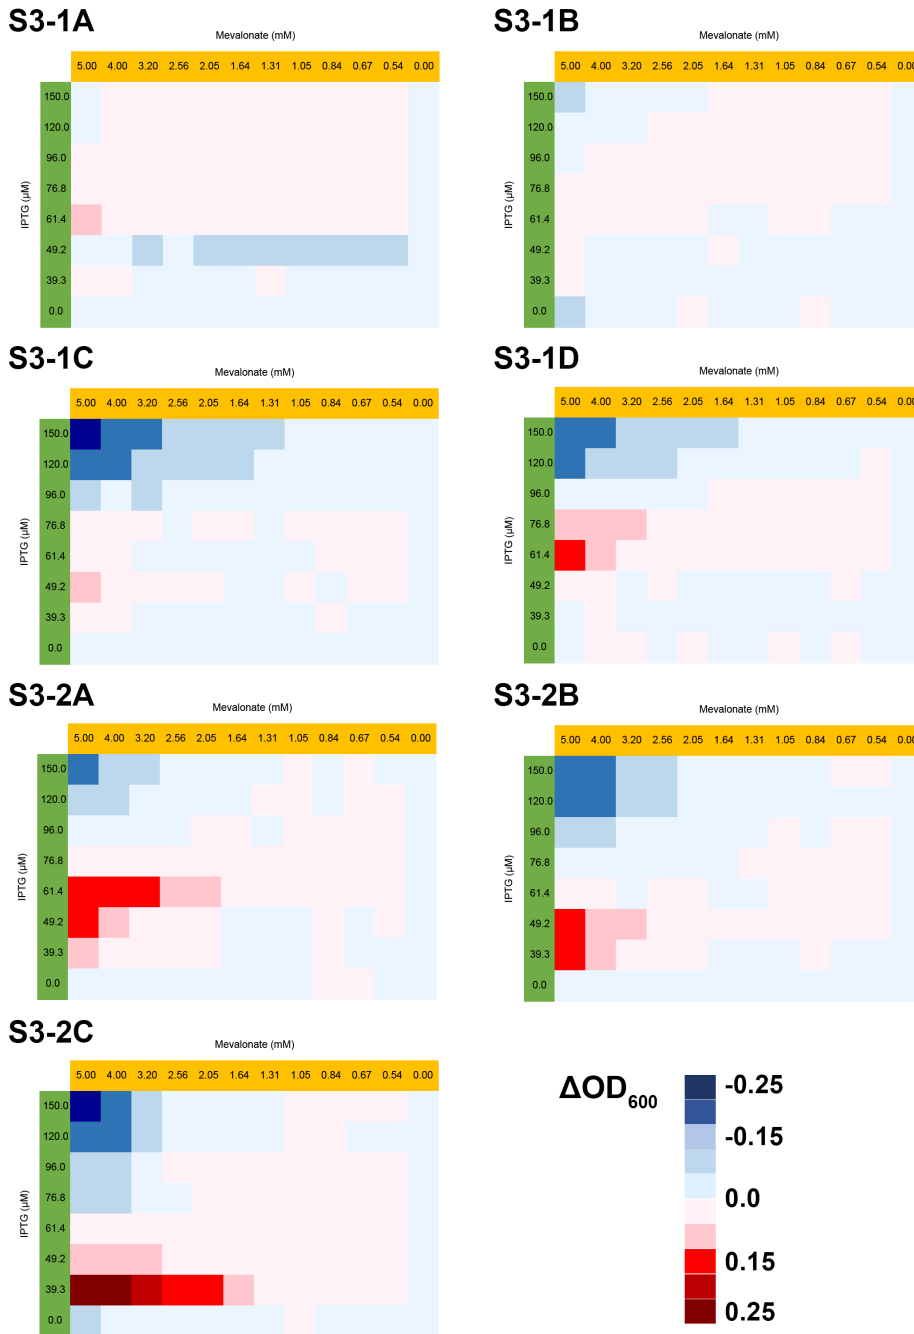

**Fig. S7. Dependency of the sensor signal on IPTG and mevalonate concentrations.** Data are from a split mDHFR assay in liquid culture. Experimental conditions: varied concentrations of IPTG and mevalonate, 0.4% L-arabinose, 1  $\mu g/ml$  TMP, cultured at 35  $^{\circ}C$ . Data are averaged over 6 plates per design.



**Figure S8**

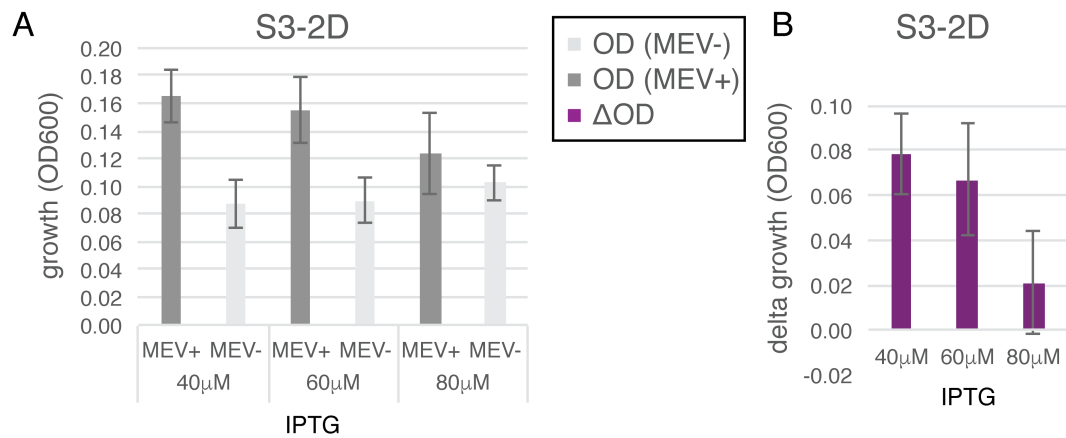

**Fig. S8. (A) Growth +/- mevalonate and (B) change in growth for design S3-2D.** Experimental conditions: 35 °C, 1 μg/ml TMP, 5 mM mevalonate. Error bars are standard deviation from at least 4 biological replicates and 8 replicates for each biological replicate.

Figure S9

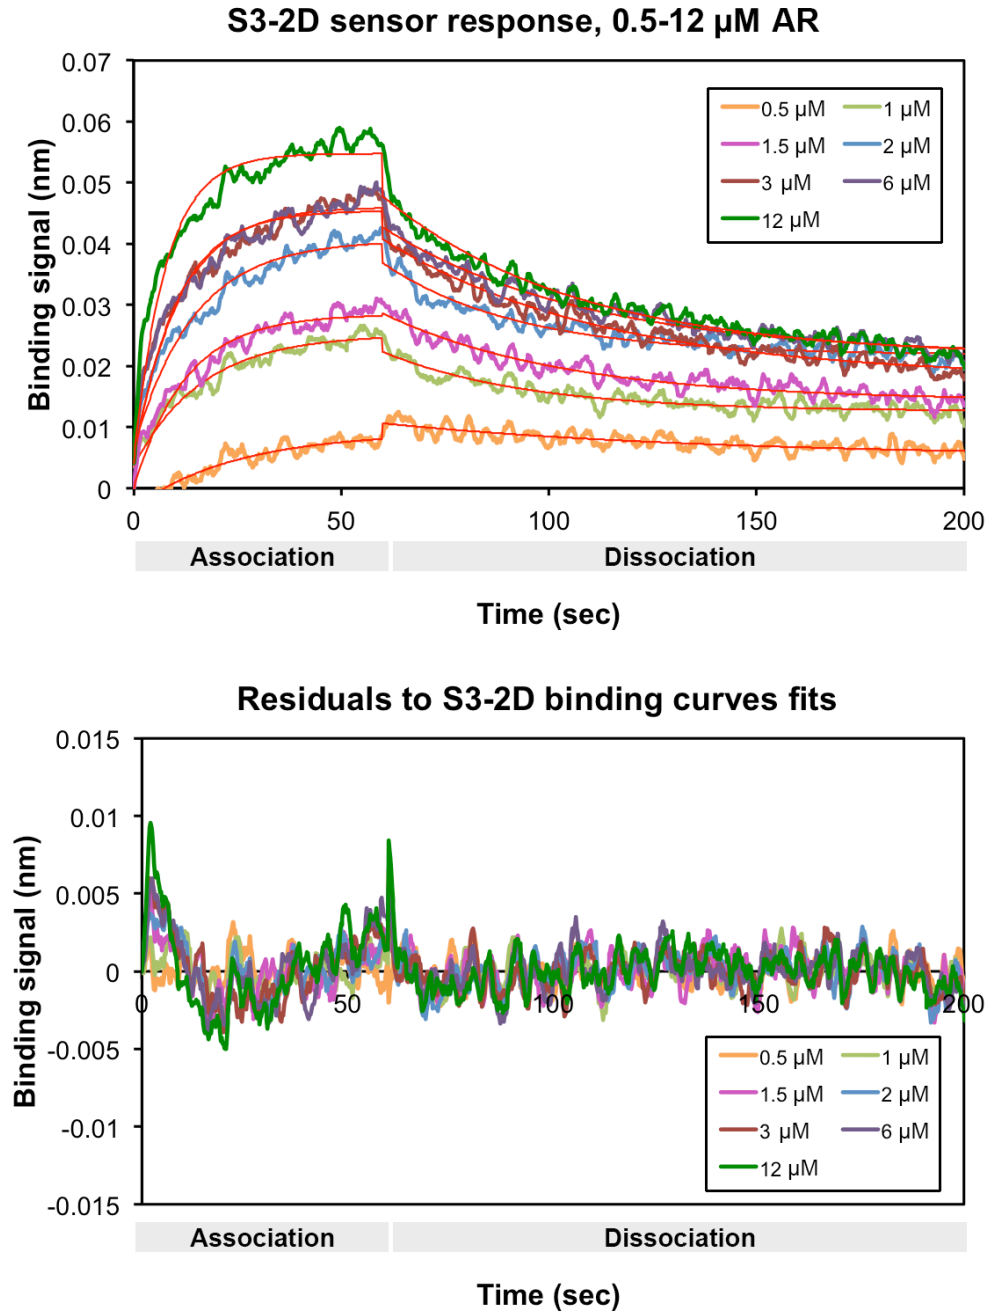

**Fig. S9. BLI binding assay representative data and fits.** The apparent  $K_D$  of design S3-2D was measured using immobilized avi-MBP-2.5, titrated AR-2.7 at indicated concentrations (top), in the presence of 200  $\mu\text{M}$  FPP. Red lines in the top plot indicate fit to the data and residuals are shown in the bottom plot.

Figure S10

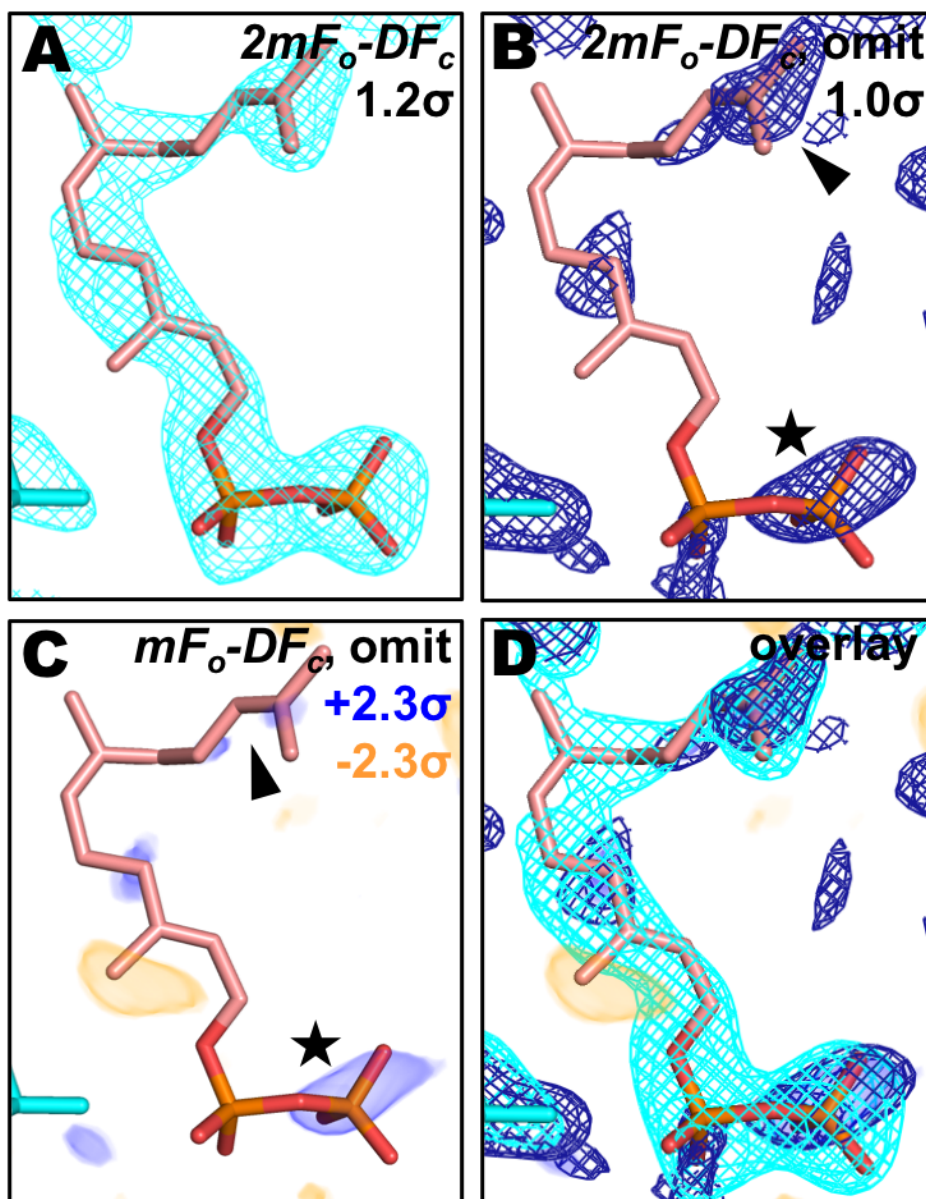

**Fig. S10. Electron density maps supporting placement of the FPP ligand.** The  $2mF_o-DF_c$  electron density map created using the final model phases (A, cyan mesh) shows good agreement with the modeled ligand (RSCC=0.89). The  $2mF_o-DF_c$  (B, dark blue mesh) and  $mF_o-DF_c$  (C, blue/orange volumes) omit maps contain notable peaks corresponding to the pyrophosphate group (marked with a star) and the aliphatic tail (marked with an arrow), which resembled peaks in the  $2mF_o-DF_c$  and  $mF_o-DF_c$  maps that were used to initially identify the ligand. An overlay of the different electron density maps (D) shows the co-localization of these features in real space.

Figure S11

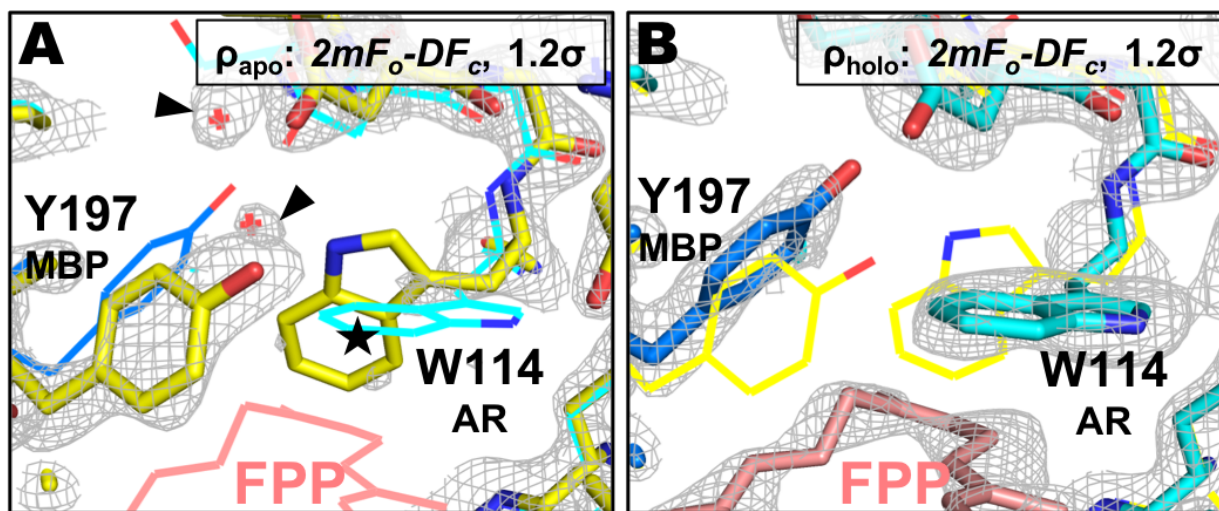

**Fig. S11. Electron density supporting ligand-induced rearrangement of the FPP binding site.** In the unoccupied FPP binding site (yellow models, density shown in panel (A)), Y197 in the MBP monomer is rotated down into the binding pocket, and W114 of the AR monomer appears flexible, likely occupying multiple rotameric states (denoted by a star). When the binding site is occupied (MBP models in blue, AR models in cyan, density shown in panel (B)), the Y197 side chain rotates away from the FPP molecule, displacing a small network of neighboring water molecules (indicated by the black arrows in panel A), and W114 becomes well-ordered with its indole group packed against the bound FPP molecule (pink).

**Figure S12**

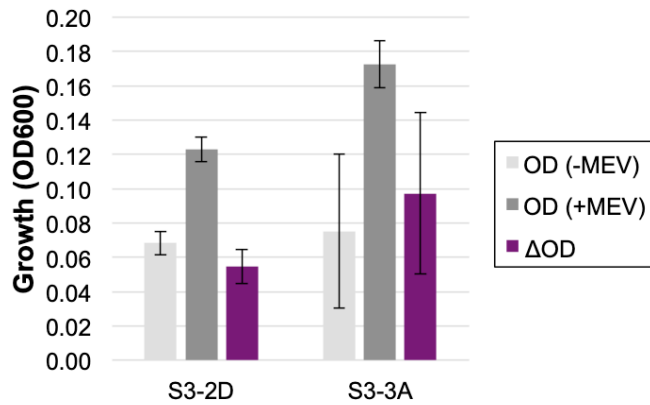

**Fig. S12. Comparison of S3-2D and S3-3A (Y197A mutation) in the split mDHFR assay.** Design S3-3A is an active sensor in *E. coli*. Experimental conditions: 35 °C, 60 μM IPTG, 6 μg/ml TMP, 0.4% L-arabinose. Error bars are standard deviations,  $n=8$  for each design and +/- mevalonate condition.

Figure S13

### A S3-2D

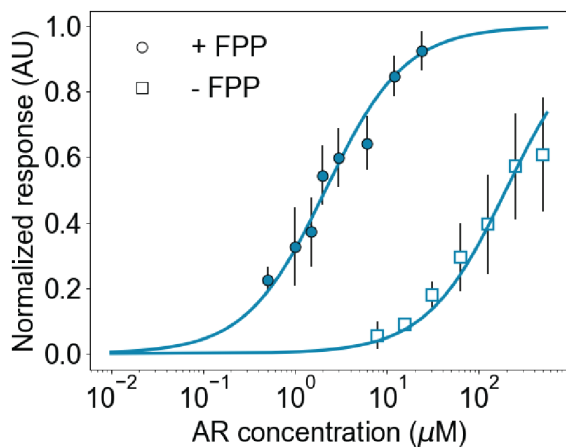

### B S3-3A

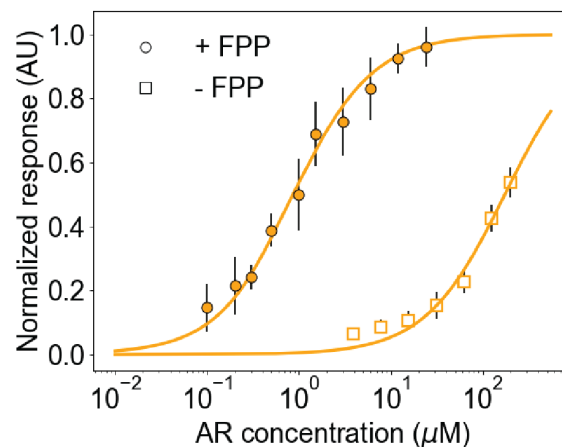

### C S3-3B

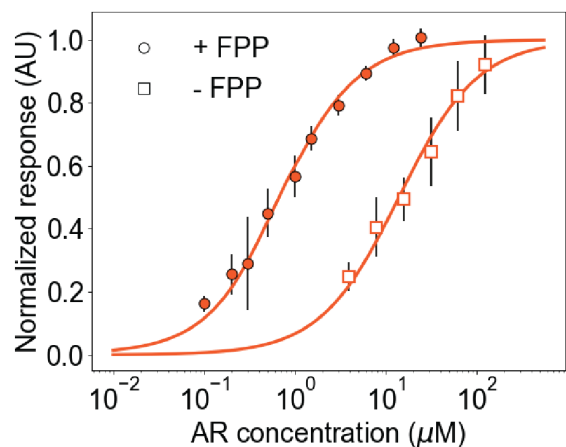

### D S3-3C

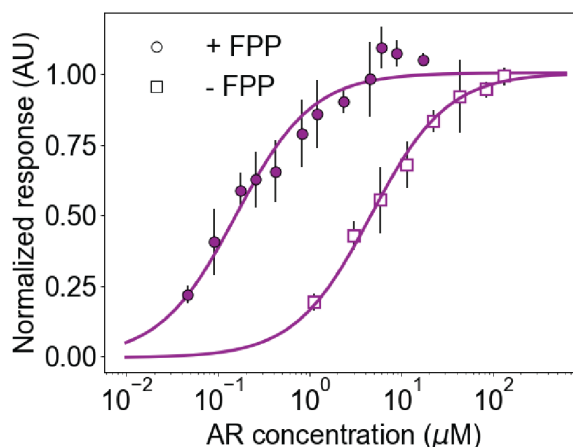

**Fig. S13. BLI binding data +/- FPP for designs S3-2D, S3-3A, S3-3B, S3-3C.** Experiments use immobilized MBP variants titrating in AR variants at the indicated concentrations. Data for the +FPP condition are also shown in **Figure 3E** and depicted here for comparison. Apparent  $K_D$  values are given in **Figure 3C**. Error bars are standard deviations,  $n \geq 3$  for each of +/- FPP conditions.

**Figure S14**

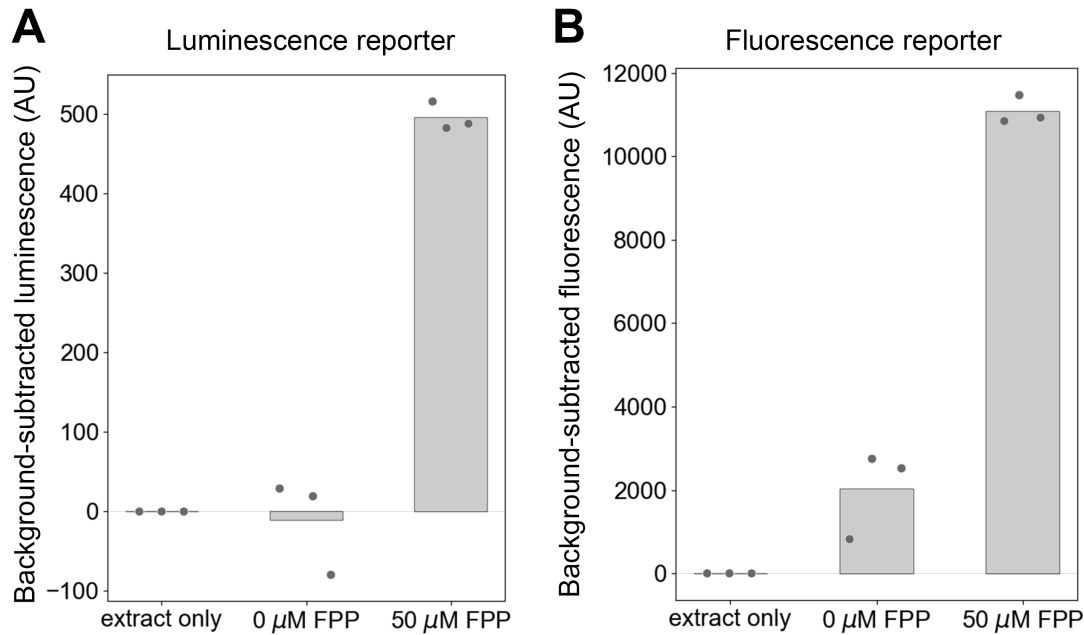

**Fig. S14. TxTI data for sensor S3-2D.** Background-subtracted sensor signal for *in vitro* TxTI experiments using (A) split luciferase and (B) dimerization-dependent fluorescent protein reporters. The background is the fluorescent or luminescent signal measured in the assay for the cell extract only control (no AR or MBP plasmids). The bar height shows the average, with individual data points from technical triplicates overlaid. In (B), the observed signal in the absence of FPP for sensors fused to the fluorescence reporter is about 20% of the total signal at high (saturating) concentrations of FPP, which could be a result of the higher affinity of the reporter components for each other as compared to the split luciferase components.

In general in CID systems, the maximum amplitude of the sensor signal is intrinsically limited by the difference in sensor protein heterodimerization affinity in the presence and absence of the small molecule (as shown in **Fig. 3B**; the sensor protein affinity difference can be additionally influenced by residual affinity of the reporter halves for each other at the relevant concentrations), the concentration of ternary complex at which this difference is maximized, and the reporter signal at this concentration. Compared to the non-split reporter alone at the same concentration, the signal could be reduced by imperfect reconstitution of the split reporter and local differences in structure, stability, or dynamics.

**Appendix 1: Plasmids / constructs for split mDHFR reporter assays.** See **Appendix 4** for full DNA sequences for each gene and vector listed below.

#### Designs with C-terminal split mDHFR

| Construct | Vector background | Description             |
|-----------|-------------------|-------------------------|
| DHFR1     | pCDFDuet*         | FKBP12/FRB design S1-1A |
| DHFR2     | pCDFDuet          | RapF/ComA design S2-1A  |
| DHFR3     | pCDFDuet          | RapF/ComA design S2-1B  |
| DHFR4     | pCDFDuet          | RapF/ComA design S2-1C  |
| DHFR5     | pCDFDuet          | RapF/ComA design S2-1D  |
| DHFR6     | pCDFDuet          | AR/MBP design S3-1A     |
| DHFR7     | pCDFDuet          | AR/MBP design S3-1B     |
| DHFR8     | pCDFDuet          | AR/MBP design S3-1C     |
| DHFR9     | pCDFDuet          | AR/MBP design S3-1D     |
| DHFR10    | pCDFDuet          | AR/MBP Design S3-2A     |
| DHFR11    | pCDFDuet          | AR/MBP Design S3-2B     |
| DHFR12    | pCDFDuet          | AR/MBP Design S3-2C     |
| DHFR13    | pCDFDuet          | AR/MBP Design S3-2D     |
| DHFR14    | pCDFDuet          | AR/MBP Design S3-3A     |

\* pCDFDuet (Novagen) is spectromycin/spectinomycin-resistant and has the CDF origin of replication. Each protein is fused to one of the subunits of split mDHFR. See **Appendix 3** for sequences of split mDHFR subunits.

#### Mevalonate pathway constructs

| Construct  | Vector background | Description                             |
|------------|-------------------|-----------------------------------------|
| pMBIS      | pB8a**            | <i>ERG12-ERG8-MVD1-idi-ispA</i>         |
| ispA R116A | pB8a              | pMBIS + loss of function in <i>ispA</i> |
| pB5K       | pB8a              | pMBIS + <i>ADS</i>                      |

\*\* pB8a is chloramphenicol-resistant and has the pBBR1 origin of replication.

*ERG12*: mevalonate kinase from *S. cerevisiae*;

*ERG8*: phosphomevalonate kinase from *S. cerevisiae*;

*MVD*: mevalonate pyrophosphate decarboxylase from *S. cerevisiae*;

*idi*: IPP isomerase from *E. coli*;

*ispA*: FPP synthase from *E. coli*.

Plasmid *ispA* R116A contains a single point mutation in *ispA* that reduces catalytic activity 13-fold(36). Plasmid pB5K adds amorphaadiene synthase (*ADS*) that converts FPP to amorphaadiene(20).



### Motif residue alanine reversions with C-terminal split mDHFR

| <b>Construct</b> | <b>Vector background</b> | <b>Description</b>     |
|------------------|--------------------------|------------------------|
| <b>DHFR15</b>    | pCDFDuet                 | Design S3-2C AR L89A   |
| <b>DHFR16</b>    | pCDFDuet                 | Design S3-2C AR W114A  |
| <b>DHFR17</b>    | pCDFDuet                 | Design S3-2C AR R145A  |
| <b>DHFR18</b>    | pCDFDuet                 | Design S3-2C MBP F133A |

**Appendix 2: Plasmids / constructs for *in vitro* binding experiments and crystallography.** These constructs included the C-terminal alpha helix in MBP (residues 354-370). See **Appendix 4** for full DNA sequences for each gene and vector listed below.

**Constructs for bio-layer interferometry (Designs S3-2D, S3-3A, S3-3B and S3-3C)**

| <b>Construct</b> | <b>Vector background</b> | <b>Description*</b> |
|------------------|--------------------------|---------------------|
| <b>BLI1</b>      | pET28b-GG                | AR-2.7              |
| <b>BLI2</b>      | pET28b-GG                | Avi-MBP-2.5         |
| <b>BLI3</b>      | pET28b-GG                | AR-3.8              |
| <b>BLI4</b>      | pET28b-GG                | Avi-MBP-3.6         |

\*Avi tag sequence

DNA: GGTCTGAACGACATCTTCGAGGCTCAGAAAATCGAATGGCACGAA

Protein: GLNDIFEAQKIEWHE

**Constructs for crystallography (Design S3-2D)**

| <b>Construct</b> | <b>Vector background</b> | <b>Description</b> |
|------------------|--------------------------|--------------------|
| <b>CR1</b>       | pET28a                   | MBP-2.5            |
| <b>CR2</b>       | pET47b(+)                | AR-2.7             |

**Appendix 3: Plasmids / constructs for TxTl reporter assays.** See Appendix 4 for full DNA sequences for each gene, vector, and reporter listed below.

**Designs S3-2D and S3-3A constructs for TxTl cell-free reporter assay**

| <b>Construct</b> | <b>Vector background*</b> | <b>Description**</b> |
|------------------|---------------------------|----------------------|
| <b>TxTl1</b>     | TxTl T7 A1                | LgBIT-AR-2.7         |
| <b>TxTl2</b>     | TxTl T7 A2                | MBP-2.5-SmBIT        |
| <b>TxTl3</b>     | TxTl T7 A2                | ddRFPb-AR-2.7        |
| <b>TxTl4</b>     | TxTl T7 A2                | MBP-2.5-ddGFPa       |
| <b>TxTl5</b>     | TxTl T7 A2                | MBP-3.6-SmBIT        |
| <b>TxTl6</b>     | TxTl T7 A2                | MBP-3.6-ddGFPa       |

\* The TxTl T7 A1 vector has a kanamycin resistance cassette and a p15a origin of replication. The TxTl T7 A2 vector has an ampicillin resistance cassette and a ColE1 origin of replication.

\*\*LgBIT: 18 kDa large subunit of the engineered split nanoluciferase, NanoBiT  
SmBIT: 1.3 kDa (11 amino acid peptide) small subunit of NanoBiT

ddRFPb: 26 kDa dimerization-dependent protein that fluoresces in complex with ddGFPa.

ddGFPa: 26 kDa dimerization-dependent protein that fluoresces in complex with ddRFPb.

ddRFPb + ddGFPa complex is excited at 493 and 380 nm, with emission peaks at 448 and 508 nm.

**Controls for TxTl cell-free reporter assay**

| <b>Construct</b> | <b>Vector background</b> | <b>Description</b> |
|------------------|--------------------------|--------------------|
| <b>TxTl7</b>     | TxTl T7 A1               | LgBIT-WT AR        |
| <b>TxTl8</b>     | TxTl T7 A2               | WT MBP-SmBIT       |
| <b>TxTl9</b>     | TxTl T7 A2               | ddRFPb-WT AR       |
| <b>TxTl10</b>    | TxTl T7 A2               | WT MBP-ddGFPa      |

**Additional construct**

| <b>Construct</b> | <b>Vector background***</b> | <b>Description</b>           |
|------------------|-----------------------------|------------------------------|
| <b>TxTl11</b>    | TxTl T500 A3                | T7 RNA polymerase expression |

\*\*\*The TxTl T500 A3 vector has an ampicillin resistance cassette and a p15a origin of replication. The target gene is expressed from the Pr promoter from lambda phage.

## Appendix 4: Gene and vector DNA sequences.

### pCDFDuet

CGCTGACGTCGGTACCCTCGAGTCTGGTAAAGAAACCGCTGCTGCGAAATTTGAACGCCAGCACATGGAC  
TCGTCTACTAGCGCAGCTTAATTAACCTAGGCTGCTGCCACCGCTGAGCAATAACTAGCATAAACCCTTG  
GGCCTCTAAACGGGTCTTGAGGGGTTTTTTGCTGAAACCTCAGGCATTTGAGAAGCACACGGTCACACT  
GCTTCCGGTAGTCAATAAACCGGTAAACCAGCAATAGACATAAGCGGCTATTTAACGACCCTGCCCTGAA  
CCGACGACCGGGTCATCGTGGCCGGATCTTGC GGCCCTCGGCTTGAACGAATGTTAGACATTATTTGC  
CGACTACCTTGGTGTATCTCGCCTTTCACGTAGTGGACAAATTCCTCCAAGTATGTCGCGCGGAGGCCAA  
GCGATCTTCTTCTTGTCCAAGATAAGCCTGTCTAGCTTCAAGTATGACGGGCTGATACTGGGCCGGCAGG  
CGCTCCATTGCCCAGTCGGCAGCGACATCCTTCGGCGCGATTTTGC CGGTTACTGCGCTGTACCAAATGC  
GGGACAACGTAAGCACTACATTTTCGCTCATCGCCAGCCAGTCGGGCGGCGAGTTCATAGCGTTAAGGT  
TTCATTTAGCGCCTCAAATAGATCCTGTTTCAGGAACCGGATCAAAGAGTTCCTCCGCCGCTGGACCTACC  
AAGGCAACGCTATGTTCTCTTGCTTTTGTGTCAGCAAGATAGCCAGATCAATGTCGATCGTGGCTGGCTCGA  
AGATACCTGCAAGAATGTCATTGCGCTGCCATTCTCAAATTCAGTTCGCGCTTAGCTGGATAACGCCA  
CGGAATGATGTCGTCGTGCACAACAATGGTGACTTCTACAGCGCGGAGAATCTCGCTCTCTCCAGGGGAA  
GCCGAAGTTTCCAAAAGGTCGTTGATCAAAGCTCGCCGCGTGTTCATCAAGCCTTACGGTCACCGTAA  
CCAGCAAATCAATATCACTGTGTGGCTTCAGGCCGCATCCACTGCGGAGCCGTACAAATGTACGGCCAG  
CAACGTCGGTTCGAGATGGCGCTCGATGACGCCAACTACCTCTGATAGTTGAGTCGATACTTCGGCGATC  
ACCGCTTCCCTCATACTCTTCTTTTCAATATTATTGAAGCATTTATCAGGGTTATTGTCTCATGAGCG  
GATACATATTTGAATGTATTTAGAAAAATAAACAAATAGCTAGCTCACTCGGTCGCTACGCTCCGGGCGT  
GAGACTGCGGCGGGCGCTGCGGACACATACAAAGTTACCCACAGATTCGCGTGGATAAGCAGGGGACTAAC  
ATGTGAGGCAAAACAGCAGGGCCGCGCCGGTGGCGTTTTTCCATAGGCTCCGCCCTCCTGCCAGAGTTCA  
CATAAACAGACGCTTTTCCGGTGCATCTGTGGGAGCCGTGAGGCTCAACCATGAATCTGACAGTACGGGC  
GAAACCCGACAGGACTTAAAGATCCCCACCGTTTCCGGCGGGTCGCTCCCTCTGCGCTCTCCTGTTCCG  
ACCTGCCGTTTTACCGGATACCTGTTCCGCCCTTCTCCCTTACGGGAAGTGTGGCGTTTTCTCATAGCTC  
ACACACTGGTATCTCGGCTCGGTGTAGGTCGTTTCGCTCCAAGCTGGGCTGTAAGCAAGAAGTCCCCGTTT  
AGCCCGACTGCTGCGCCTTATCCGGTAACTGTTCACTTGTAGTCCAACCCGAAAAGCACGGTAAAACGCC  
ACTGGCAGCAGCCATTGGTAACTGGGAGTTCGCAGAGGATTTGTTTAGCTAAACACCGGTTGCTCTTGA  
AGTGTGCGCCAAAGTCCGGCTACACTGGAAGGACAGATTTGGTTGCTGTGCTCTGCGAAAGCCAGTTACC  
ACGGTTAAGCAGTTCCTCAACTGACTTAACCTTCGATCAAACCACCTCCCAGGTGGTTTTTTTCGTTTAC  
AGGGCAAAGATTACGCGCAGAAAAAAGGATCTCAAGAAGATCCTTTGATCTTTTCTACTGAACCGCTC  
TAGATTTCAAGTGAATTTATCTCTCAAATGTAGCACCTGAAGTCAGCCCATAACGATATAAGTTGTAAT  
TCTCATGTTAGTCATGCCCGCGCCCACCGGAAGGAGCTGACTGGGTTGAAGGCTCTCAAGGGCATCGGT  
CGAGATCCCAGTGCCTAATGAGTGAGCTAACTTACATTAATTGCGTTGCGCTCACTGCCCGCTTCCAGT  
CGGGAAACCTGTGCTGCCAGCTGCATTAATGAATCGGCCAACCGCGGGGAGAGGGCGGTTTTGCGTATTGG  
GCGCCAGGGTGGTTTTTTCTTTTACCAGTGAGACGGGCAACAGCTGATTGCCCTTACC CGCTGGCCCTG  
AGAGAGTTGCAGCAAGCGGTCCACGCTGGTTTTGCCCCAGCAGGCGAAAATCCTGTTTGATGGTGGTTAAC  
GGCGGGATATAACATGAGCTGTCTTCGGTATCGTCGTATCCCCTACCGAGATGTCCGCACCAACGCGCA  
GCCCCGACTCGGTAATGGCGCGCATTCGCGCCAGCGCCATCTGATCGTTGGCAACCAGCATCGCAGTGGG  
AACGATGCCCTCATTACAGATTTGCATGGTTTTGTTGAAAACCGGACATGGCACTCCAGTGCCTTCCCCT  
TCCGCTATCGGCTGAATTTGATTGCGAGTGAGATATTTATGCCAGCCAGCCAGACGCAGACGCGCCGAGA  
CAGAACTTAATGGGCCCGCTAACAGCGCGATTTGCTGGTGACCCAATGCGACCAGATGCTCCACGCCAG  
TCGCGTACCGTCTTCATGGGAGAAAATAATACTGTTGATGGGTGTCTGGTCAGAGACATCAAGAAAATAAC  
GCCGGAACATTAGTGCAGGCAGCTTCCACAGCAATGGCATCCTGGTCATCCAGCGGATAGTTAATGATCA  
GCCACTGACGCGTTGCGCGAGAAGATTGTGCACCGCCGCTTTACAGGCTTCGACGCCGCTTCGTTCTAC  
CATCGACACCACCGCTGGCACCCAGTTGATCGGCGCGAGATTTAATCGCCGCGACAATTTGCGACGGC  
GCGTGCAGGGCCAGACTGGAGGTGGCAACGCCAATCAGCAACGACTGTTTGCCCGCCAGTTGTTGTGCCA  
CGCGGTTGGGAATGTAATTCAGCTCCGCCATCGCCGCTTCCACTTTTTCCCGGTTTTTCGCAGAAACGTG

GCTGGCCTGGTTCACCACGCGGGAAACGGTCTGATAAGAGACACCGGCATACTCTGCGACATCGTATAAC  
GTTACTGGTTTTACATTACACCACCTGAATTGACTCTCTTCCGGGCGCTATCATGCCATACCGCGAAAGG  
TTTTGCGCCATTTCGATGGTGTCCGGGATCTCGACGCTCTCCCTTATGCGACTCCTGCATTAGGAAATTA  
TACGACTCACTATAGGGGAATTGTGAGCGGATAACAATTCCCCTGTAGAAATAATTTTGTTTAACTTTAA  
TAAGGAGATATAACC

**pB8a**

GGATCCTAACTCGAGTAAGGATCTCCAGGCATCAAATAAAACGAAAGGCTCAGTCGAAAGACTGGGCCTT  
TCGTTTTATCTGTTGTTTTGTGCGGTGAACGCTCTCTACTAGAGTCACACTGGCTCACCTTCGGGTGGGCCT  
TTTTCGTTTTATACCTAGGCTACAGCCGATAGTCTGGAACAGCGCACTTACGGGTGCTGCGCAACCCAAG  
TGCTACCGGCGCGGCAGCGTGACCCGTGTCGGCGGCTCCAACGGCTCGCCATCGTCCAGAAAACACGGCT  
CATCGGGCATCGGCAGGCGCTGCTGCCCGCGCCGTTCCCATTCCTCCGTTTTCGGTCAAGGCTGGCAGGTC  
TGGTTCATGCCCCGAATGCCGGGCTGGCTGGGCGGCTCCTCGCCGGGGCCGGTCGGTAGTTGCTGCTCG  
CCCCGATACAGGGTCGGGATGCGGCGCAGGTCGCCATGCCCAACAGCGATTTCGTCTGGTTCGTGCTGAT  
CAACCACCACGGCGGCACTGAACACCGACAGGCGCAACTGGTCGCGGGGCTGGCCCCACGCCACGCGGTC  
ATTGACCACGTAGGCCAACACGGTGCAGGGGCGGTTGAGCTTCACGACGAGATCCAGCGCTCGGCCACC  
AAGTCCTTGACTGCGTATTGGACCGTCCGCAAAGAAGCTCCGATGAGCTTGAAAGTGTCTTCTGGCTGA  
CCACCACGGCGTTCGTTGGTGGCCATCTGCGCCACGAGGTGATGCAGCAGCATTGCCGCCGTGGGTTCCT  
CGCAATAAGCCCCGGCCCACGCCCTCATGCGTTTTGCGTTCCGTTTGCACCCAGTGACCGGGCTTGTCTTG  
GCTTGAATGCCGATTTCTCTGGACTGCGTGGCCATGCTTATCTCCATGCGGTAGGGGTGCCGCACGGTTG  
CGGCACCATGCGCAATCAGCTGCAACTTTTCGGCAGCGGACAACAATTATGCGTTGCGTAAAAGTGGCA  
GTCAATTACAGATTTCTTTAACCTACGCAATGAGCTATTGCGGGGGGTGCCGCAATGAGCTGTTGCGTA  
CCCCCTTTTTTAAAGTTGTTGATTTTTAAAGTCTTTCGCATTTCCGCCCTATATCTAGTTCTTTGGTGGCCA  
AAGAAGGGCACCCCTGCGGGGTTCCCCACGCCCTTCGGCGCGGCTCCCCCTCCGGCAAAAAGTGGCCCCT  
CCGGGGCTTGTGATCGACTGCGCGGCCCTTCGGCTTGCCCAAGGTGGCGCTGCCCCCTTGGAACCCCCG  
CACTCGCCGCCGTGAGGCTCGGGGGGAGGCGGGCGGGCTTCGCCCTTCGACTGCCCCCACTCGCATAGG  
CTTGGTTCGTTCCAGGCGCGTCAAGGCCAAGCCGCTGCGCGGTGCTGCGCGAGCCTTGACCCGCCTTCC  
ACTTGGTGTCCAACCGGCAAGCGAAGCGCGCAGGCCGCGAGGCCGAGGCACTAGTGCTTGATTCACC  
AATAAAAAACGCCGGCGGCAACCGAGCGTTCGAAACAATCCAGATGGAGTTCTGAGGTCATTACTGGA  
TCTATCAACAGGAGTCCAAGCGAGCTCGTAAACTTGGTCTGACAGTTACGCCCCGCCCTGCCACTCATCG  
CAGTACTGTTGTAATTCATTAAGCATTCTGCCGACATGGAAGCCATCACAAACGGCATGATGAACCTGAA  
TCGCCAGCGGCATCAGCACCTTGTGCGCTTGCCTATAATATTTGCCCATGGTGAAAACGGGGGCGAAGAA  
GTTGTCCATATTGGCCACGTTTTAAATCAAACCTGGTGAACCTCACCCAGGGATTGGCTGAGACGAAAAC  
ATATTCTCAATAAACCCTTTTAGGGAAATAGGCCAGGTTTTACCGTAACACGCCACATCTTGCGAATATA  
TGTGTAGAAACTGCCGAAATCGTCTGTTGATTCCTCCAGAGCGATGAAAACGTTTCAGTTTGCTCATG  
GAAAACGGTGTAAACAAGGGTGAACACTATCCCATATCACCAGCTCACCGTCTTTCATTGCCATACGGAAT  
TCCGGATGAGCATTATCAGGCGGGCAAGAATGTGAATAAAGGCCGATAAAAACCTTGTGCTTATTTTTCT  
TTACGGTCTTTAAAAAGGCCGTAATATCCAGCTGAACGGTCTGGTTATAGGTACATTGAGCAACTGACTG  
AAATGCCTCAAAATGTTCTTTACGATGCCATTGGGATATATCAACGGTGGTATATCCAGTGATTTTTTTC  
TCCATACTCTTCTTTTCAATATATTGAAGCATTTATCAGGGTTATTGTCTCATGAGCGGATACATAT  
TTGAATGTATTTAGAAAAATAAACAAATAGGGGTTCGCGCACATTTCCCCGAAAAGTGCCACCTGACGT  
C

**pET28b-GG (with GFP dropout)**

TGGCGAATGGGACGCGCCCTGTAGCGGCGCATTAAGCGCGGGCGGTGTGGTGGTTACGCGCAGCGTGACC  
GCTACACTTGCCAGCGCCCTAGCGCCCGCTCCTTTTCGTTTTCTTCCCTTCTTCTCGCCACGTTTCGCCG  
GCTTTCCCCGTCAAGCTCTAAATCGGGGGCTCCCTTTAGGGTTCGATTTAGTGCTTTACGGCACCTCGA  
CCCCAAAAAAGTTGATTAGGGTGTGTTTACAGTAGTGGGCCATCGCCCTGATAGACGGTTTTTTCGCCCT  
TTGACGTTGGAGTCCACGTTCTTTAATAGTGGACTCTTGTTCAAAAGTGAACAACACTCAACCCTATCT  
CGGTCTATTTCTTTGATTTATAAGGGATTTTTCGGCTATTGGTTAAAAAATGAGCTGATTTA

ACAAAAATTTAACGCGAATTTTAAACAAAATATTAACGTTTACAATTTTCAGGTGGCACTTTTCGGGGAAAT  
GTGCGCGGAACCCCTATTTGTTTATTTTTCTAAATACATTTCAAATATGTATCCGCTCATGAATTAATTCT  
TAGAAAACTCATCGAGCATCAAATGAAACTGCAATTTATTCATATCAGGATTATCAATACCATATTTTT  
GAAAAAGCCGTTTCTGTAATGAAGGAGAAAACCTACCGAGGCAGTTCCATAGGATGGCAAGATCCTGGTA  
TCGGTCTGCGATTCCGACTCGTCCAACATCAATACAACCTATTAATTTCCCCTCGTCAAAAATAAGGTTA  
TCAAGTGAGAAATCACCATGAGTGACGACTGAATCCGGTGAGAAATGGCAAAGTTTATGCATTTCTTTCC  
AGACTTGTTC AACAGGCCAGCCATTACGCTCGTTCATCAAATCACTCGCATCAACCAAACCGTTATTCAT  
TCGTGATTGCGCCTGAGCGAGACGAAATACGCGATCGCTGTTAAAAGGACAATTACAAACAGGAATCGAA  
TGCAACCGGCGCAGGAACACTGCCAGCGCATCAACAATATTTTACCTGAATCAGGATATTCTTCTAATA  
CCTGGAATGCTGTTTTCCCGGGGATCGCAGTGGTGAGTAACCATGCATCATCAGGAGTACGGATAAAATG  
CTTGATGGTCGGAAGAGGCATAAAATCCGTGAGCCAGTTTAGTCTGACCATCTCATCTGTAACATCATTG  
GCAACGCTACCTTTGCCATGTTTCAGAAACAACCTGGCGCATCGGGCTTCCATAACAATCGATAGATTG  
TCGCACCTGATTGCCGACATTATCGCGAGCCATTTATACCCATATAAATCAGCATCCATGTTGGAATT  
TAATCGCGGCCTAGAGCAAGACGTTTCCCCTGAAATATGGCTCATAACACCCCTTGTATTACTGTTTATG  
TAAGCAGACAGTTTTATTGTTTCATGACCAAAATCCCTTAAACGTGAGTTTTCGTTCCACTGAGCGTCAGAC  
CCCGTAGAAAAGATCAAAGGATCTTCTTGAGATCCTTTTTTCTGCGCGTAATCTGCTGCTTGCAAACAA  
AAAAACCACCGCTACCAGCGGTGGTTTTGTTTGGCGGATCAAGAGCTACCAACTCTTTTTCCGAAGGTAAC  
TGGCTTCAGCAGAGCGCAGATACCAAATACTGTCTTCTAGTGTAGCCGTAGTTAGGCCACCACTTCAAG  
AACTCTGTAGCACCGCTACATACTCGCTCTGCTAATCCTGTTACCAGTGGCTGCTGCCAGTGGCGATA  
AGTCGTGTCTTACCGGGTTGGACTCAAGACGATAGTTACCAGGATAAGGCGCAGCGGTCCGGGCTGAACGGG  
GGGTTCTGTGCACACAGCCAGCTTGGAGCGAACGACCTACACCGAACTGAGATACCTACAGCGTGAGCTA  
TGAGAAAGCGCCACGCTTCCCGAAGGGAGAAAGGCGGACAGGTATCCGGTAAGCGGCAGGGTTCGGAACAG  
GAGAGCGCACGAGGGAGCTTCCAGGGGAAACGCTGGTATCTTTATAGTCTGTGCGGGTTTTCGCCACCT  
CTGACTTGAGCGTCGATTTTTGTGATGCTCGTCAGGGGGCGGAGCCTATGGAAAAACGCCAGCAACGCG  
GCCTTTTTACGGTTCTTGGCCTTTTGTGCTGGCCTTTTGTGCTCACATGTTCTTTCTGCGTTATCCCCTGATT  
CTGTGGATAACCGTATTACCAGCCTTTGAGTGAGCTGATACCGCTCGCCGAGCCGAACGACCGAGCGCAG  
CGAGTCAGTGAGCGAGGAAGCGGAAGAGCGCCTGATGCGGTATTTTCTCCTTACGCATCTGTGCGGTATT  
TCACACCGCATATATGGTGCCTCTCAGTACAATCTGCTCTGATGCCGCATAGTTAAGCCAGTATACT  
CCGCTATCGCTACGTGACTGGGTGATGGCTGCGCCCCGACACCCGCCAACACCCGCTGACGCGCCCTGAC  
GGGCTTGTCTGCTCCCGGCATCCGCTTACAGACAAGCTGTGACCGTCTCCGGGAGCTGCATGTGTCAGAG  
GTTTTACCGTCATCACCGAAACGCGCGAGGCAGCTGCGGTAAAGCTCATCAGCGTGGTTCGTGAAGCGAT  
TCACAGATGTCTGCCGTTTCATCCGCGTCCAGCTCGTTGAGTTTCTCCAGAAGCGTTAATGTCTGGCTTC  
TGATAAAGCGGGCCATGTTAAGGGCGGTTTTTTCTGTTTGGTCACTGATGCCTCCGTGTAAGGGGGATT  
TCTGTTTCATGGGGTAATGATACCGATGAAACGAGAGAGGATGCTCACGATACGGGTTACTGATGATGAA  
CATGCCCGGTTACTGGAACGTTGTGAGGGTAAACAACCTGGCGGTATGGATGCGGCGGGACCAGAGAAAAA  
TCACTCAGGGTCAATGCCAGCGCTTCGTTAATACAGATGTAGGTGTTCCACAGGGTAGCCAGCAGCATCC  
TGCGATGCAGATCCGGAACATAATGGTGCAGGGCGCTGACTTCCGCGTTTTCCAGACTTTACGAAACACGG  
AAACCGAAGACCATTCATGTTGTTGCTCAGGTGCGAGACGTTTTGTCAGCAGCAGTCGCTTCACGTTGCT  
CGCGTATCGGTGATTCATTCTGCTAACAGTAAGGCAACCCCGCCAGCCTAGCCGGGTCTCAACGACAG  
GAGCACGATCATGCGCACCCGTGGGGCCGATGCCGGCGATAATGGCCTGCTTCTCGCCGAAACGTTTTG  
GTGGCGGGACCAGTGACGAAGGCTTGAGCGAGGGCGTGCAAGATCCGAATACCGCAAGCGACAGGCCGA  
TCATCGTCCGCTCCAGCGAAAGCGGTCTCGCCGAAAATGACCCAGAGCGCTGCCGGCACCTGTCCTAC  
GAGTTGCATGATAAAGAAGACAGTCATAAGTGCGGCGACGATAGTCATGCCCGCGCCACCGGAAGGAG  
CTGACTGGGTTGAAGGCTCTCAAGGGCATCGGTGAGATCCCGGTGCCTAATGAGTGAGCTAACTTACAT  
TAATTGCGTTGCGCTCACTGCCCGCTTTCCAGTCGGGAAACCTGTCGTGCCAGCTGCATTAATGAATCGG  
CCAACGCGCGGGGAGAGGCGGTTTTGCGTATTGGGCGCCAGGGTGGTTTTTTCTTTTTACCAGTGAGACGGG  
CAACAGCTGATTGCCCTTACCAGCCTGGCCCTGAGAGAGTTGCAGCAAGCGGTCCACGCTGGTTTGGCCC  
AGCAGGCGAAAATCCTGTTTTGATGGTGGTTAACGCGGGGATATAACATGAGCTGTCTTCGGTATCGTCGT  
ATCCCCTACCAGATATCCGCACCAACGCGCAGCCGGACTCGGTAATGGCGCGCATTGCGCCAGCGC  
CATCTGATCGTTGGCAACCAGCATCGCAGTGGGAACGATGCCCTCATTACGATTTGCATGGTTTGTGTA  
AAACCGGACATGGCACTCCAGTCGCTTCCCCTCCGCTATCGGCTGAATTTGATTGCGAGTGAGATATT  
TATGCCAGCCAGCCAGACGACGCGCCGAGACAGAACTTAATGGGCCCCGCTAACAGCGGATTTGCTG

GTGACCCAATGCGACCAGATGCTCCACGCCAGTCGCGTACCGTCTTCATGGGAGAAAATAATACTGTTG  
ATGGGTGTCTGGTCAGAGACATCAAGAAATAACGCCGGAACATTAGTGCAGGCAGCTTCCACAGCAATGG  
CATCCTGGTCATCCAGCGGATAGTTAATGATCAGCCACTGACGCGTTGCGCGAGAAGATTGTGCACCGC  
CGCTTTACAGGCTTCGACGCCGCTTCGTTCTACCATCGACACCACCACGCTGGCACCAGTTGATCGGCG  
CGAGATTTAATCGCCGCGACAATTTGCGACGGCGCGTGCAGGGCCAGACTGGAGGTGGCAACGCCAATCA  
GCAACGACTGTTTTGCCCGCCAGTTGTTGTGCCACGCGGTTGGGAATGTAATTCAGCTCCGCCATCGCCGC  
TTCCACTTTTTTCCCGCGTTTTTCGCAGAAACGTGGCTGGCCTGGTTCACCACGCGGGAAACGGTCTGATAA  
GAGACACCGGCATACTCTGCGACATCGTATAACGTTACTGGTTTTACATTACCACCCTGAATTGACTCT  
CTTCCGGGCGCTATCATGCCATAACGCGAAAGGTTTTGCGCCATTCGATGGTGTCCGGGATCTCGACGCT  
CTCCCTTATGCGACTCCTGCATTAGGAAGCAGCCAGTAGTAGGTTGAGGCCGTTGAGCACCGCCGCCGC  
AAGGAATGGTGCATGCAAGGAGATGGCGCCCAACAGTCCCCCGCCACGGGGCCTGCCACCATAACCACG  
CCGAAACAAGCGCTCATGAGCCGAAGTGGCGAGCCCGATCTTCCCATCGGTGATGTCGGCGATATAGG  
CGCCAGCAACCGCACCTGTGGCGCCGGTGTGCGGCCACGATGCGTCCGGCGTAGAGGATCGAGATCTC  
GATCCCGCGAAATTAATACGACTCACTATAGGGGAATTGTGAGCGGATAACAATTCCTCTAGAAATAA  
TTTTGTTTAACTTTAAGAAGGAGATATACCATGGGAGACCTCCCTATCAGTGATAGAGATTGACATCCC  
TATCAGTGATAGAGATACTGAGCACGGATCTTAGCTACTAGAGAAAAGAGGAGAAAATACTAGATGCGTAA  
GGCGAAGAGCTGTTCACTGGTGTGCTCCCTATTCTGGTGGAACTGGATGGTGTGTCACCGGTCATAAGT  
TTTCCGTGCGTGGCGAGGGTGAAGGTGACGCAACTAATGGTAAACTGACGCTGAAGTTCATCTGTACTAC  
TGGTAAACTGCCGGTACCTTGGCCGACTCTGGTAAACGACGCTGACTTATGGTGTTCAGTGCTTTGCTCGT  
TATCCGGACCATATGAAGCAGCATGACTTCTTCAAGTCCGCCATGCCGGAAGGCTATGTGCAGGAACGCA  
CGATTTCCTTTTAAGGATGACGGCACGTACAAAACGCGTGCAGGAAGTGAATTTGAAGGCGATAACCCTGGT  
AAACCGCATTGAGCTGAAAGGCATTGACTTTAAAGAAGACGGCAATATCCTGGGCCATAAGCTGGAATAC  
AATTTAACAGCCACAATGTTTACATCACCGCCGATAAACAAAAAATGGCATTAAAGCGAATTTTAAAA  
TTCGCCACAACGTGGAGGATGGATCTGTGCAGCTGGCTGATCACTACCAGCAAAACACTCCAATCGGTGA  
TGGTCTGTTCTGCTGCCAGACAATCACTATCTGAGCACGAAAGCGTTCGTCTAAAGATCCGAACGAG  
AAACGCGATCATATGGTTCGTGAGTTCGTAACCGCAGCGGGCATCACGCATGGTATGGATGAACTGT  
ACAAATGAGGTCTCTTAAGAGCTCCGTGACAAAGCTTGCAGCGCCACTCGAGCACCACCACCACCAC  
TGAGATCCGGCTGCTAACAAAGCCGAAAGGAAGCTGAGTTGGCTGCTGCCACCGCTGAGCAATAACTAG  
CATAACCCCTTGGGGCCTCTAAACGGGTCTTGAGGGGTTTTTTGCTGAAAGGAGGAACTATATCCGGAT

**pET28a**

TGGCGAATGGGACGCGCCCTGTAGCGGCGCATTAAGCGCGCGGGTGTGGTGGTTACGCGCAGCGTGACC  
GCTACACTTGCCAGCGCCCTAGCGCCCGCTCCTTTTCGCTTTCTTCCCTTCCCTTCTCGCCACGTTCCGCC  
GCTTTCCCGTCAAGCTCTAAATCGGGGGCTCCCTTTAGGGTTCGATTTAGTGCTTTACGGCACCTCGA  
CCCCAAAAAAGCTTGAATTAGGGTGTGGTTCACGTAGTGGGCCATCGCCCTGATAGACGGTTTTTCGCCCT  
TTGACGTTGGAGTCCACGTTCTTTAATAGTGGACTCTTGTTCAAAAGTGAACAACACTCAACCCTATCT  
CGGTCTATTCTTTGATTTATAAGGGATTTTGGCGATTTTCGGCCTATTGGTTAAAAAATGAGCTGATTTA  
ACAAAAATTTAACGCGAATTTTAAACAAAATATTAACGCTTACAATTTAGGTGGCACTTTTCGGGGAAATG  
TGCGCGGAACCCCTATTTGTTTATTTTTCTAAATACATTCAAATATGTATCCGCTCATGAATTAATCTT  
AGAAAAACTCATCGAGCATCAAATGAACTGCAATTTATTCATATCAGGATTATCAATACCATATTTTTG  
AAAAAGCCGTTTCTGTAATGAAGGAGAAAAGTCAACCGAGGCAGTTCATAGGATGGCAAGATCCTGGTAT  
CGGTCTGCGATTCCGACTCGTCCAACATCAATACAACCTATTAATTTCCCTCGTCAAAAATAAGGTTAT  
CAAGTGAGAAATCACCATGAGTGACGACTGAATCCGGTGAAGATGGCAAAAGTTTATGCATTTCTTTCCA  
GACTTGTTCAACAGGCCAGCCATTACGCTCGTCATCAAAATCACTCGCATCAACCAAACCGTTATTCATT  
CGTGATTGCGCCTGAGCGAGACGAAATACGCGATCGTGTAAAAGGACAATTACAAACAGGAATCGAAT  
GCAACCGGCGCAGGAACACTGCCAGCGCATCAACAATATTTTTCACCTGAATCAGGATATCTTCTAATAC  
CTGGAATGCTGTTTTCCCGGGGATCGCAGTGGTGAAGTACCATGCATCATCAGGAGTACGGATAAAAATGC  
TTGATGGTGCAGGAGGAGGATAAATCCGTCAGCCAGTTTAGTCTGACCATCTCATCTGTAACATCATTGG  
CAACGCTACCTTTGCCATGTTTCAGAAACAACCTCTGGCGCATCGGGCTTCCATACAATCGATAGATTGT  
CGCACCTGATTGCCCGACATTATCGCGAGCCATTTATACCCATATAAATCAGCATCCATGTTGGAATTT  
AATCGCGGCTTAGAGCAAGACGTTCCCGTTGAATATGGCTCATAACCCCTTGTATTACTGTTTATGT

AAGCAGACAGTTTTATTTGTTTCATGACCAAATCCCTTAACGTGAGTTTTTCGTTCCACTGAGCGTCAGACC  
CCGTAGAAAAGATCAAAGGATCTTCTTGAGATCCTTTTTTTCTGCGCGTAATCTGCTGCTTGCAAACAAA  
AAAACCACCGCTACCAGCGGTGGTTTGTGGCCGATCAAGAGCTACCAACTCTTTTTCCGAAGGTA  
GGCTTCAGCAGAGCGCAGATACCAAATACTGTCTTCTAGTGTAGCCGTAGTTAGGCCACCCTCAAGA  
ACTCTGTAGCACCCGCTACATACCTCGCTCTGCTAATCCTGTTACCAGTGGCTGCTGCCAGTGGCGATAA  
GTCGTGTCTTACCGGGTTGGACTCAAGACGATAGTTACCGGATAAGGCGCAGCGGTCCGGGCTGAACGGGG  
GGTTCGTGCACACAGCCAGCTTGGAGCGAACGACCTACACCGAACTGAGATACCTACAGCGTGAGCTAT  
GAGAAAGCGCCACGCTTCCCGAAGGGAGAAAGGCGGACAGGTATCCGGTAAGCGGCAGGGTCCGAACAGG  
AGAGCGCACGAGGGAGCTTCCAGGGGGAAACGCCTGGTATCTTTATAGTCTGTGCGGGTTTCGCCACCTC  
TGACTTGAGCGTCGATTTTTGTGATGCTCGTCAGGGGGCGGAGCCTATGGAAAACGCCAGCAACGCGG  
CCTTTTTACGGTTCCTGGCCTTTTGTGCGCTTTTGTCTCACATGTTCTTTTCTGCGTTATCCCCTGATTC  
TGTGGATAACCGTATTACCGCCTTTGAGTGAGCTGATACCGCTCGCCGACGCCAACGACCGAGCGCAGC  
GAGTCAGTGAGCGAGGAAGCGGAAGAGCGCCTGATGCGGTATTTTCTCCTTACGCATCTGTGCGGTATTT  
CACACCGCATATATGGTGCACCTCTCAGTACAATCTGCTCTGATGCCGCATAGTTAAGCCAGTATACACTC  
CGCTATCGCTACGTGACTGGGTTCATGGCTGCGCCCCGACACCCGCCAACACCCGCTGACGCGCCCTGACG  
GGCTTGTCTGCTCCCGGCATCCGCTTACAGACAAGCTGTGACCGTCTCCGGGAGCTGCATGTGTGTCAGAGG  
TTTTACCGTTCATACCGAAACGCGCGAGGCAGCTGCGGTAAGCTCATCAGCGTGGTCTGTAAGCGGATT  
CACAGATGTCTGCCTGTTTCATCCGCGTCCAGCTCGTTGAGTTTTCTCAGAAGCGTTAATGTCTGGCTTCT  
GATAAAGCGGGCCATGTTAAGGGCGGTTTTTTCTGTTTGGTCACTGATGCCTCCGTGTAAGGGGGATTT  
CTGTTTCATGGGGGTAATGATACCGATGAAACGAGAGAGGATGCTCACGATACGGGTACTGATGATGAAC  
ATGCCCGGTTACTGGAACGTTGTGAGGGTAAACAACCTGGCGGTATGGATGCGGGCGGGACCAGAGAAAAAT  
CACTCAGGGTCAATGCCAGCGCTTCGTTAATACAGATGTAGGTGTTCCACAGGGTAGCCAGCAGCATCCT  
GCGATGCAGATCCGGAACATAATGGTGCAGGGCGCTGACTTCCGCGTTTTCCAGACTTTACGAAACACGGA  
AACCGAAGACCATTTCATGTTGTTGCTCAGGTCGCAGACGTTTTGCAGCAGCAGTCGTTTACGTTTCGCTC  
GCGTATCGGTGATTCATTTCTGTAACCAGTAAGGCAACCCCGCCAGCCTAGCCGGTCTCAACGACAGG  
AGCAGATCATGCGCACCCGTGGGGCCGCCATGCCGGCGATAATGGCCTGCTTCTCGCCGAAACGTTTGG  
TGGCGGGACCAGTGACGAAGGCTTGAGCGAGGGCGTGCAAGATTCCGAATACCGCAAGCGACAGGCCGAT  
CATCGTCGCGCTCCAGCGAAAGCGGTCTCGCCGAAATGACCCAGAGCGCTGCCGGCACCTGTCTTACG  
AGTTGCATGATAAAGAAGACAGTCATAAGTGCGGCGACGATAGTCATGCCCCGCGCCACCGGAAGGAGC  
TGACTGGGTTGAAGGCTCTCAAGGGCATCGGTGAGATCCCGGTGCCTAATGAGTGAGCTAACTTACATT  
AATTGCGTTGCGCTCACTGCCCGCTTTCCAGTCGGGAAACCTGTGCTGCCAGCTGCATTAATGAATCGGC  
CAACGCGCGGGGAGAGGCGGTTTTGCGTATTGGGCGCCAGGGTGGTTTTTTCTTTTACCAGTGAGACGGGC  
AACAGCTGATTGCCCTTACCGCCTGGCCCTGAGAGAGTTGCAGCAAGCGGTCCACGCTGGTTTTGCCCA  
GCAGGCGAAAATCCTGTTTTGATGGTGGTTAACGGCGGGATATAACATGAGCTGTCTTCGGTATCGTCGTA  
TCCCCTACCGAGATATCCGCACCAACGCGCAGCCCGGACTCGGTAATGGCGCGCATTTGCGCCAGCGCC  
ATCTGATCGTTGGCAACCAGCATCGCAGTGGGAACGATGCCCTCATTTCAGCATTTGCATGGTTTTGTTGAA  
AACCGGACATGGCACTCCAGTCGCCTTCCCGTTCGCTATCGGCTGAATTTGATTGCGAGTGAGATATTT  
ATGCCAGCCAGCCAGACGCAGACGCGCCGAGACAGAACTTAATGGGCCCGCTAACAGCGCGATTTGCTGG  
TGACCAATGCGACCAGATGCTCCACGCCCAGTCGCGTACCGTCTTCATGGGAGAAAATAATACTGTTGA  
TGGGTGCTGGTTCAGAGACATCAAGAAATAACGCCGGAACATTAGTGCAGGCAGCTTCCACAGCAATGGC  
ATCCTGGTTCATCCAGCGGATAGTTAATGATCAGCCACTGACCGGTTGCGCGAGAAGATTGTGCACCGCC  
GCTTTACAGGCTTCGACGCGCTTCGTTCTACCATCGACACCACCAGCTGGCACCCAGTTGATCGGGCGC  
GAGATTTAATCGCCGCGACAATTTGCGACGGCGGTGCAGGGCCAGACTGGAGGTGGCAACGCCAATCAG  
CAACGACTGTTTGGCCGCGAGTTGTTGTGCCACGCGGTTGGGAATGTAATTCAGCTCCGCCATCGCCGCT  
TCCACTTTTTCCCGCGTTTTTCGCAGAAACGTGGCTGGCCTGGTTTACCACGCGGGAAACGGTCTGATAAG  
AGACACCGGCATACTCTGCGACATCGTATAACGTTACTGGTTTTCACATTCACCACCCTGAATTGACTCTC  
TTCCGGGCGCTATCATGCCATACCGCGAAAGTTTTGCGCCATTCGATGGTGTCCGGGATCTCGACGCTC  
TCCCTTATGCGACTCCTGCATTAGGAAGCAGCCAGTAGTAGGTTGAGGCCGTTGAGCACCGCCGCGCA  
AGGAATGGTGCATGCAAGGAGATGGCGCCAACAGTCCCCGCGCCAGGGGCTGCCACCATACCACGC  
CGAAACAAGCGCTCATGAGCCCGAAGTGGCGAGCCCGATCTTCCCATCGGTGATGTGCGCGATATAGGC  
GCCAGCAACCGCACCTGTGGCGCCGGTGTGCGGCCACGATGCGTCCGGCGTAGAGGATCGAGATCTCG  
ATCCCGCGAAATTAATACGACTCACTATAGGGGAATTTGTGAGCGGATAACAATCCCCTCTAGAAAATAAT



TTTGTTTAACTTTAAGAAGGAGATATACCATGGGCAGCAGCCATCATCATCATCACAGCAGCGGCCCT  
GGTGCCGCGCGGCAGCCATATGGCTAGCATGACTGGTGGACAGCAAATGGGTGCGGGATCCGAATTCGAG  
CTCCGTCGACAAGCTTGC GGCCGCACTCGAGCACCACCACCACCCTGAGATCCGGCTGCTAACAAA  
GCCCCAAAGGAAGCTGAGTTGGCTGCTGCCACCGCTGAGCAATAACTAGCATAACCCCTTGGGGCCTCTA  
AACGGGTCTTGAGGGGTTTTTTTGTGAAAGGAGGAAC TATATCCGGAT

**pET47b (+)**

ATCCGGATATAGTTCCCTCCTTTTCAGCAAAAAACCCCTCAAGACCCGTTTTAGAGGCCCAAGGGGTATATGC  
TAGTTATTGCTCAGCGGTGGCAGCAGCCAACTCAGCTTCCTTTTCGGGCTTTGTTTAGCAGCCTAGGTTAA  
TTAAGCCTCGAGAGCAGCAGAAGTAGAGCTGTCCATGTGCTGGCGTTCGAATTTAGCAGCAGCGGTTTTCT  
TTACTACCGCGTGGCACCAGAGCGAGCTCTGCGGCCGCAAGCTTGTGACGGACGTCGGGCGCGCCAAGG  
CCTGTACAGAATTCGGATCCTGGTACCCGGGTCCCTGAAAGAGGACTTCAAGAGCCGCGGAGTGATGGTG  
GTGGTGATGTGCCATATGTATATCTCCTTCTTAAAGTTAAACAAAATTATTTCTAGAGGGGAATTGTTAT  
CCGCTCACAATTCCTTATAGTGAGTCGTATTAATTTTCGCGGGATCGAGATCGATCTCGATCCTCTACGC  
CGGACGCATCGTGGCCGGCATCACCGGCCACAGGTGCGGTTGCTGGCGCCTATATCGCCGACATCACC  
GATGGGGAAGATCGGGCTCGCCACTTCGGGCTCATGAGCGCTTGTTCGGCGTGGGTATGGTGGCAGGCC  
CCGTGGCCGGGGGACTGTTGGGCGCCATCTCCTTGCATGCACCATTCCTTGGCGCGGCGGTGCTCAACGG  
CCTCAACCTACTACTGGGCTGCTTCCTAATGCAGGAGTCGCATAAGGGAGAGCGTCGAGATCCCGGACAC  
CATCGAATGGCGCAAAACCTTTTCGCGGTATGGCATGATAGCGCCCGGAAGAGAGTCAATTCAGGGTGGTG  
AATGTGAAACCAGTAACGTTATACGATGTGCGAGAGTATGCCGGTGTCTCTTATCAGACCGTTTTCCCGCG  
TGGTGAACCAGGCCAGCCACGTTTTCTGCGAAAACGCGGGAAAAAGTGAAGCGGCGATGGCGGAGCTGAA  
TTACATTCCCAACCGCGTGGCACAACAACCTGGCGGGCAAACAGTCGTTGCTGATTGGCGTTGCCACCTCC  
AGTCTGGCCCTGCACGCGCCGTGCAAAATGTGCGGGCGATTAATCTCGCGCCGATCAACTGGGTGCCA  
GCGTGGTGGTGTGATGGTAGAACGAAGCGGCGTGAAGCCTGTAAAGCGGCGGTGCACAATCTTCTCGC  
GCAACGCGTCAGTGGGCTGATCATTAAC TATCCGCTGGATGACCAGGATGCCATTGCTGTGGAAGCTGCC  
TGC ACTAATGTTCCGGCGTTATTTCTTGATGTCTGACCAGACACCCATCAACAGTATTATTTCTCCC  
ATGAAGACGGTACGCGACTGGGCGTGGAGCATCTGGTGCATTGGGTACCAGCAAATCGCGCTGTTAGC  
GGGCCATTAAGTTCTGTCTCGGCGCTGTGCGTGGCTGGCTGGCATAAATATCTCACTCGCAATCAA  
ATTCAGCCGATAGCGGAACGGGAAGGCGACTGGAGTGCCATGTCCGGTTTTCAACAAACCATGCAAATGC  
TGAATGAGGGCATCGTTCCCACTGCGATGCTGGTTGCCAACGATCAGATGGCGCTGGGCGCAATGCGCGC  
CATTACCGAGTCCGGGCTGCGCGTTGGTGC GGACATCTCGGTAGTGGGATACGACGATAACGAAGACAGC  
TCATGTTATATCCCGCCGTTAACCAACCATCAAACAGGATTTTTCGCCTGCTGGGGCAAACCAGCGTGGACC  
GCTTGCTGCAACTCTCTCAGGGCCAGGCGGTGAAGGGCAATCAGCTGTTGCCCGTCTCACTGGTGAAAAG  
AAAAACCACCCTGGCGCCAATACGCAAACCGCCTCTCCCCGCGGTTGGCCGATTCATTAATGCAGCTG  
GCACGACAGGTTTTCCGACTGGAAAGCGGGCAGTGAGCGCAACGCAATTAATGTAAGTTAGCTCACTCAT  
TAGGCACCGGGATCTCGACCGATGCCCTTGAGAGCCTTCAACCCAGTCAGCTCCTTCCGGTGGGCGCGGG  
GCATGACTAGCATGATCGTGTCTCTGTCTGTTGAGGACCCGGCTAGGCTGGCGGGGTTGCCTTACTGGTTA  
GCAGAAATGAATCACCGATACGCGAGCGAACGTGAAGCGACTGCTGCTGCAAAACGCTGCGACCTGAGCA  
ACAACATGAATGGTCTTCGGTTTTCCGTGTTTTCGTAAAGTCTGGAAACGCGGAAGTCAGCGCCCTGCACCA  
TTATGTTCCGGATCTGCATCGCAGGATGCTGCTGGCTACCCTGTGGAACACCTACATCTGTATTAACGAA  
GCGCTGGCATTGACCTGAGTGATTTTTCTCTGGTCCCGCCGCATCCATAACCGCCAGTTGTTTACCCTCA  
CAACGTTCCAGTAACCGGGCATGTTTCATCATCAGTAACCCGTATCGTGAGCATCCTCTCTCGTTTCATCG  
GTATCATTACCCCATGAACAGAAAATCCCCCTTACACGGAGGCATCAGTGACCAAACAGGAAAAACCGC  
CCTTAACATGGCCCGCTTTATCAGAAGCCAGACATTAACGCTTCTGGAGAAACTCAACGAGCTGGACGCG  
GATGAACAGGCAGACATCTGTGAATCGTTTACGACCACGCTGATGAGCTTTACC GCAGCTGCCCTCGCGC  
GTTTTCGGTGATGACGGTGA AAACCTCTGACACATGCAGCTCCCGGAGACGGTCACAGCTTGTCTGTAAGC  
GGATGCCGGGAGCAGACAAGCCGTCAGGGCGCGTCAGCGGGTGTGGCGGGTGTGGGGGCGCAGCCATG  
ACCCAGTCACGTAGCGATAGCGGAGTGTATACTGGCTTAACTATGCGGCATCAGAGCAGATTGTACTGAG  
AGTGACCATATATGCGGTGTGAAATACCGCACAGATGCGTAAGGAGAAAATACCGCATCAGGCGCTCTT  
CCGCTTCTCGCTCACTGACTCGCTGCGCTCGGTGTTTCGGCTGCGGCGAGCGGTATCAGCTCACTCAA  
GGCGTAATACGGTTATCCACAGAATCAGGGGATAACGCAGGAAAGAACATGTGAGCAAAGGCCAGCAA

AAGGCCAGGAACCGTAAAAAGGCCGCGTTGCTGGCGTTTTTCCATAGGCTCCGCCCCCTGACGAGCATC  
ACAAAAATCGACGCTCAAGTCAGAGGTGGCGAAACCCGACAGGACTATAAAGATACCAGGCGTTCCCCC  
TGGAAGCTCCCTCGTGCCTCTCTGTTCCGACCTGCCGTTACCGGATACCTGTCCGCCTTCTCCCT  
TCGGGAAGCGTGGCGCTTCTCATAGCTCACGCTGTAGGTATCTCAGTTCGGTGTAGGTCGTTCCGCTCCA  
AGCTGGGCTGTGTGCACGAACCCCCGTTACGCCGACCGCTGCGCCTTATCCGGTAACTATCGTCTTGA  
GTCCAACCCGGTAAAGACACGACTTATCGCCACTGGCAGCAGCCACTGGTAACAGGATTAGCAGAGCGAGG  
TATGTAGGCGGTGCTACAGAGTTCTTGAAGTGGTGGCCTAACTACGGCTACACTAGAAGGACAGTATTTG  
GTATCTGCGCTCTGCTGAAGCCAGTTACCTTCGGAAAAAGAGTTGGTAGCTCTTGATCCGGCAAACAAC  
CACCGCTGGTAGCGGTGGTTTTTTTTGTTTTGCAAGCAGCAGATTACGCGCAGAAAAAAGGATCTCAAGAA  
GATCCTTTGATCTTTTCTACGGGTCTGACGCTCAGTGGAAACGAAAACCTCACGTTAAGGGATTTTGGTCA  
TGAACAATAAACTGTCTGCTTACATAAACAGTAATAACAAGGGGTGTTATGAGCCATATTCAACGGGAAA  
CGTCTTGCTCTAGGCCGCGATTAAATTC AACATGGATGCTGATTTATATGGGTATAAATGGGCTCGCGA  
TAATGTCGGGCAATCAGGTGCGACAATCTATCGATTGTATGGGAAGCCCGATGCGCCAGAGTTGTTCTG  
AAACATGGCAAAGGTAGCGTTGCCAATGATGTTACAGATGAGATGGTCAGACTAACTGGCTGACGGAAT  
TTATGCCTCTTCCGACCATCAAGCATTATCCGTACTCCTGATGATGCATGGTTACTCACCCTGCGAT  
CCCCGGCAAACAGCATTCCAGGTATTAGAAGAATATCCTGATTCAGGTGAAAATATTGTTGATGCGCTG  
GCAGTGTTCCTGCGCCGGTTGCATTCGATTCTGTTTGTAAATTGTCCTTTTAAACAGTGATCGCGTATTT  
GTCTCGCTCAGGCGCAATCACGAATGAATAACGGTTTGGTTGATGCGAGTGATTTTGTATGACGAGCGTAA  
TGGCTGGCCTGTTGAACAAGTCTGGAAAGAAATGCATAAACTTTTGCATTCTCACCGGATTCAGTCGTC  
ACTCATGGTGATTTCTCACTTGATAACCTTATTTTTGACGAGGGGAAATTAATAGGTTGTATTGATGTTG  
GACGAGTCGGAATCGCAGACCGATACCAGGATCTTGCCATCCTATGGAACCTGCCTCGGTGAGTTTTCTCC  
TTCATTACAGAAACGGCTTTTTCAAAAATATGGTATTGATAATCCTGATATGAATAAATTGCAGTTTCAT  
TTGATGCTCGATGAGTTTTTCTAAGAATTAATTCATGAGCGGATACATATTTGAATGTATTTAGAAAAAT  
AAACAAATAGGGGTTCGCGCACATTTCCCGAAAAGTGCCACCTGAAATTGTAAACGTTAATATTTTGT  
TAAAATTCGCGTTAAATTTTTGTTAAATCAGCTCATTTTTTAAACCAATAGGCCGAAATCGGCAAATCCC  
TTATAAATCAAAAGAATAGACCGAGATAGGGTTGAGTGTGTTCCAGTTTGGAAACAAGAGTCCACTATTA  
AAGAACGTGGACTCCAACGTCAAAGGGCGAAAACCGTCTATCAGGGCGATGGCCACTACGTGAACCAT  
CACCTAATCAAGTTTTTTGGGGTTCGAGGTGCCGTAAAGCACTAAATCGGAACCTAAAGGGAGCCCCCG  
ATTTAGAGCTTGACGGGGAAAGCCGGCGAACGTGGCGAGAAAGGAAGGAAGAAAGCGAAAGGAGCGGGC  
GCTAGGGCGCTGGCAAGTGTAGCGGTACGCTGCGCGTAACCACCACACCCGCGCGCTTAATGCGCCGC  
TACAGGGCGCTCCCATTCGCCA

**TxTl T7 A1**

ATCCCCAGGCATCAAATAAAACGAAAGGCTCAGTCGAAAGACTGGGCCTTTCGTTTTATCTGTTGTTTGT  
CGGTGAACGCTCTCTACTAGAGTCACACTGGCTCACCTTCGGGTGGGCCTTTCGCTTTTATAGCTGAGC  
ATGAGACGGAAATCTGCTCGTCAGTGGTGTCTCACACTGACGAATCATGTACAGATCATAACCGATGACTGC  
CTGGCGACTCACAAC TAAGCAAGACAGCCGGAACACAGCGCCGGCGAACACCCTGCATATATGGCATATC  
ACAACAGTCCAAC TAGTGC ACTGCAGTACATTATCTTAGAAAACTCATCGAGCATCAAATGAAACTGC  
AATTTATTCATATCAGGATTATCAATACCATATTTTTGAAAAAGCCGTTTCTGTAATGAAGGAGAAAAC  
CACCGAGGCAGTTCATAGGATGGCAAGATCCTGGTATCGGTCTGCGATTCCGACTCGTCCAACATCAAT  
ACAACCTATTAATTTCCCCTCGTCAAAAATAAGGTTATCAAGTGAGAAATCACCATGAGTGACGACTGAA  
TCCGGTGAGAATGGCAAAGTTTATGCATTTCTTTCCAGACTTGTTC AACAGGCCAGCCATTACGCTCGT  
CATCAAATCACTCGCATCAACCAAACCGTTATTCATTCGTGATTGCGCCTGAGCGAGACGAAAATACGCG  
ATCGCTGTTAAAAGGACAATTACAAACAGGAATCGAATGCAACCCGGCGCAGGAACACTGCCAGCGCATCA  
ACAATATTTTACCTGAATCAGGATATTCTTCTAATACCTGGAATGCTGTTTTCCGGGGATCGCAGTGG  
TGAGTAACCATGCATCATCAGGAGTACGGATAAAAATGCTTGATGGTTCGGAAGAGGCATAAATTCGTCAG  
CCAGTTTAGTCTGACCATCTCATCTGTAACATCATTTGGCAACGCTACCTTTGCCATGTTTTAGAAACAAC  
TCTGGCGCATCGGGCTTCCCATAACAATCGATAGATTGTGCGACCTGATTGCCCGACATTATCGCGAGCCC  
ATTTATACCCATATAAATCAGCATCCATGTTGGAATTTAATCGCGGCCTAGAGCAAGACGTTTCCCGTTG  
AATATGGCTCATAACACCCCTTGTATTACTGTTTATGTAAGCAGACAGTTTTTATTGGAGTTTTTCCATA  
GGCTCCGCCCCCTGACAAGCATCACGAAATCTGACGCTCAAATCAGTGGTGGCGAAACCCGACAGGACT

ATAAAGATAACCAGGCGTTTCCCCCTGGCGGCTCCCTCGTGCGCTCTCCTGTTCCCTGCCTTTTCGGTTTACC  
GGTGTCAATCCGCTGTTATGGCCGCGTTTGTCTCATTCCACGCCTGACACTCAGTTCGGGTAGGCAGTT  
CGCTCCAAGCTGGACTGTATGCACGAACCCCCCGTTCAGTCCGACCGCTGCGCCTTATCCGGTAACTATC  
GTCTTGAGTCCAACCCGGAAAGACATGAAAAGCACCCTGGCAGCAGCCACTGGTAATTGATTTAGAGG  
AGTTAGTCTTGAAGTCATGCGCCGGTTAAGGCTAAACTGAAAGGACAAGTTTTGGTGACTGCGCTCCTCC  
AAGCCAGTTACCTCGGTTCAAAGAGTTGGTAGCTCAGAGAACCTTCGAAAAACCGCCCTGCAAGGCGGTT  
TTTTCGTTTTTCAGAGCAAGAGATTACGCGCAGACCAAACGATCTCAAGAAGATCATCTTATTCCCTGAA  
TTCGCATCTAGACTGATGAGACGTGGTAGAGCCACAAACAGCCGGTACAAGCAACGATCTCCAGGACCAT  
CTGAATCATGCGCGGATGACACGAACTCACGACGGCGATCACAGACATTAACCCACAGTACAGACACTGC  
GACAACGTGGCAATTCGTGCAATAACAACGGAGGCCGTTGAGCACCGCCGCCGCAAGGAATGGTGCATGC  
AAGGAGATGGCGCCCAACAGTCCCCCGCCACGGGGCCTGCCACCATAACCCACGCCGAAACAAGCGCTCA  
TGAGCCCGAAGTGGCGAGCCCGATCTTCCCATCGGTGATGTCGGCGATATAGGCGCCAGCAACCGCACC  
TGTGGCGCCGGTATGCCGGCCACGATGCGTCCGGCGTAGAGGATCGAGATCTCGATCCCGCGAAATTA  
TACGACTCACTATAGGGGAATTGTGAGCGGATAACAATTCCCCTCTAGAAATAATTTTGTTTAACTTTAA  
GAAGGAGATATAT

**TxT1 T7 A2**

ATCCCCAGGCATCAAATAAAACGAAAGGCTCAGTCGAAAGACTGGGCCTTTTCGTTTTATCTGTTGTTTGT  
CGGTGAACGCTCTCTACTAGAGTCACACTGGCTCACCTTCGGGTGGGCCTTTCTGCGTTTTATAGCTGCCA  
ATGAGACGACGGGGTTCATCACGGCTCATCATGCGCCCAACAAATGTGTGCCATACACGCTCGGATGACTG  
CCTGATGACCGCACTGACTGGGGACAGCCGATCCACCTAAGCCTGTGAGAGAAGCAGACACCCGACAGAT  
CAAGGCAGTTAACTAGTGCAGTACATTATTTCTTAGAAAACTCATCGAGCATCAAATGAAACTGC  
AATTTATTCATATCAGGATTATCAATACCATATTTTTGAAAAAGCCGTTTCTGTAATGAAGGAGAAA  
CACCAGGCAGTTCCATAGGATGGCAAGATCCTGGTATCGGTCTGCGATTCCGACTCGTCCAACATCAAT  
ACAACCTATTAATTTCCCCTCGTCAAAAATAAGGTTATCAAGTGAGAAATCACCATGAGTGACGACTGAA  
TCCGGTGAGAATGGCAAAAGTTTATGCATTTCTTCCAGACTTGTTC AACAGGCCAGCCATTACGCTCGT  
CATCAAATCACTCGCATCAACCAAACCGTTATTCATTCGTGATTGCGCCTGAGCGAGACGAAATACGCG  
ATCGCTGTTAAAAGGACAATTACAAACAGGAATCGAATGCAACCGGCGCAGGAACACTGCCAGCGCATCA  
ACAAATTTTTACCTGAATCAGGATATTCTTCTAATACCTGGAATGCTGTTTTCCCGGGGATCGCAGTGG  
TGAGTAACCATGCATCATCAGGAGTACGGATAAAAATGCTTGATGGTCGGAAGAGGCATAAATCCGTCAG  
CCAGTTTAGTCTGACCATCTCATCTGTAACATCATTTGGCAACGCTACCTTTGCCATGTTTTAGAAACA  
TCTGGCGCATCGGGCTTCCCATACAATCGATAGATTGTCGCACCTGATTGCCCCGACATTATCGCGAGCCC  
ATTTATACCCATATAAATCAGCATCCATGTTGGAATTTAATCGCGGCCTAGAGCAAGACGTTTCCCCTTG  
AATATGGCTCATAACACCCCTTGTATTACTGTTTATGTAAGCAGACAGTTTTTATTGGAGTTTTTTCCATA  
GGCTCCGCCCCCTGACAAGCATCACGAAATCTGACGCTCAAATCAGTGGTGGCGAAACCCGACAGGACT  
ATAAAGATAACCAGGCGTTTCCCCCTGGCGGCTCCCTCGTGCGCTCTCCTGTTCCCTGCCTTTTCGGTTTACC  
GGTGTCAATCCGCTGTTATGGCCGCGTTTGTCTCATTCCACGCCTGACACTCAGTTCGGGTAGGCAGTT  
CGCTCCAAGCTGGACTGTATGCACGAACCCCCCGTTCAGTCCGACCGCTGCGCCTTATCCGGTAACTATC  
GTCTTGAGTCCAACCCGGAAAGACATGAAAAGCACCCTGGCAGCAGCCACTGGTAATTGATTTAGAGG  
AGTTAGTCTTGAAGTCATGCGCCGGTTAAGGCTAAACTGAAAGGACAAGTTTTGGTGACTGCGCTCCTCC  
AAGCCAGTTACCTCGGTTCAAAGAGTTGGTAGCTCAGAGAACCTTCGAAAAACCGCCCTGCAAGGCGGTT  
TTTTCGTTTTTCAGAGCAAGAGATTACGCGCAGACCAAACGATCTCAAGAAGATCATCTTATTCCCTGAA  
TTCGCATCTAGACTGATGAGACGTGGTAGAGCCACAAACAGCCGGTACAAGCAACGATCTCCAGGACCAT  
CTGAATCATGCGCGGATGACACGAACTCACGACGGCGATCACAGACATTAACCCACAGTACAGACACTGC  
GACAACGTGGCAATTCGTGCAATAACAACGGAGGCCGTTGAGCACCGCCGCCGCAAGGAATGGTGCATGC  
AAGGAGATGGCGCCCAACAGTCCCCCGCCACGGGGCCTGCCACCATAACCCACGCCGAAACAAGCGCTCA  
TGAGCCCGAAGTGGCGAGCCCGATCTTCCCATCGGTGATGTCGGCGATATAGGCGCCAGCAACCGCACC  
TGTGGCGCCGGTATGCCGGCCACGATGCGTCCGGCGTAGAGGATCGAGATCTCGATCCCGCGAAATTA  
TACGACTCACTATAGGGGAATTGTGAGCGGATAACAATTCCCCTCTAGAAATAATTTTGTTTAACTTTAA  
GAAGGAGATATAT

**TxT1 T500 A3**

CTCGAGGAATTCGACTCAATTAGTTCAGTCAGTTTCAGGATATTAGTCATCTCTACATTGATTATGAGTA  
TTCAGAAATTCCTTAAATATTCTGACAAATGCTCTTCCCTAAACTCCCCCATAAAAAAACCCGCCGAA  
GCGGGTTTTTACGTTATTTGCGGATTAACGATTACTCGTTATCAGAACC GCCCAGACCTGCGTTCAGCAG  
TTCTGCCAGGCTGGCAGATGCGTCTTCCGAATTGATCCGTCGACCAAAGCCCGCCGAAAGGCGGGCTTTT  
CTGTGCCGGCATGATAAGCTGTCAAACATGAGAATTACAACCTTATATCGTATGGGGCTGACTTCAGGTGC  
TACATTTGAAGAGATAAAATTGCACTGAAATCTAGAAAATATTTTATCTGATTAATAAGATGATCTTCTTGA  
GATCGTTTTTGGTCTGCGCGTAATCTCTTGTCTGAAAACGAAAAAACCGCCTTGCAGGGCGGTTTTTCGA  
AGGTTCTCTGAGCTACCAACTCTTTGAACCGAGGTAACCTGGCTTGGAGGAGCGCAGTCACCAAACTTGT  
CCTTTCAGTTTAGCCTTAACCGGCGCATGACTTCAAGACTAACTCCTCTAAATCAATTACCAGTGGCTGC  
TGCCAGTGGTGTCTTTGCATGTCTTCCGGGTTGGACTCAAGACGATAGTTACCGGATAAGGCGCAGCGG  
TCGGACTGAACGGGGGTTTCGTGCATACAGTCCAGCTTGGAGCGAACTGCCTACCCGGAACCTGAGTGTCA  
GGCGTGGAATGAGACAAACGCGGCCATAACAGCGGAATGACACCGGTAACCCGAAAGGCAGGAACAGGAG  
AGCGCACGAGGGAGCCGCCAGGGGAAACGCCTGGTATCTTTATAGTCCTGTCCGGGTTTCGCCACCACTGA  
TTTGAGCGTCAGATTTTCGTGATGCTTGTGAGGGGGCGGAGCCTATGGAAAAACGGCTTTGCCGCGGCC  
TCTCACTTCCCTGTTAAGTATCTTCCCTGGCATCTTCCAGGAAATCTCCGCCCGCTTCGTAAGCCATTTCC  
GCTCGCCGCAGTCGAACGACCGAGCGTAGCGAGTCAGTGAGCGAGGAAGCGGAATATATCCTGTATCACA  
TATTCTGCTGACGCACCGGTGCAGCCTTTTTTCTCCTGCCACATGAAGCACTTCACTGACACCCCTCATCA  
GTGCCAACATAGTAAGCCAGTATACACTCCGCTAGGGTCATGAGATTATCAAAAAGGATCTTTCACCTAGA  
TCCTTTTAAATTAATAATGAAGTTTTAAATCAATCTAAAGTATATATGAGTAAACTTGGTCTGACAGTTA  
CCAATGCTTAATCAGTGAGGCACCTATCTCAGCGATCTGTCTATTTTCGTTTCATCCATAGTTGCCTGACTC  
CCCGTCGTGTAGATAACTACGATACGGGAGGGCTTACCATCTGGCCCCAGTGTGCAATGATACCGCGAG  
ACCCACGCTCACCGGCTCCAGATTTATCAGCAATAAACCAGCCAGCCGGAAGGGCCGAGCGCAGAAGTGG  
TCCTGCAACTTTATCCGCCTCCATCCAGTCTATTAATTGTTGCCGGAAGCTAGAGTAAGTAGTTCGCCA  
GTTAATAGTTTGCACAACGTTGTTGCCATTGCTACAGGCATCGTGGTGTACGCTCGTCTGTTGGTATGG  
CTTCATTCAGCTCCGGTTCCTCAACGATCAAGGCGAGTTACATGATCCCCATGTTGTGCAAAAAAGCGGT  
TAGCTCCTTCGGTCCCTCCGATCGTTGTCAGAAGTAAGTTGGCCGAGTGTATCACTCATGGTTATGGCA  
GCACTGCATAAATCTCTTACTGTCATGCCATCCGTAAGATGCTTTTCTGTGACTGGTGAGTACTCAACCA  
AGTCATTTCTGAGAATAGTGTATGCGGCGACCGAGTTGCTCTTGGCCGCGTCAATACGGGATAAATACCGC  
GCCACATAGCAGAACTTTAAAGTGCTCATCATTGGAAAACGTTCTTCCGGGGCGAAAACCTCTCAAGGATC  
TTACCGCTGTTGAGATCCAGTTCGATGTAACCCACTCGTGCACCCAACCTGATCTTCAGCATCTTTTACTT  
TCACCAGCGTTTTCTGGGTGAGCAAAAACAGGAAGGCAAAATGCCGCAAAAAGGGAATAAGGGCGACACG  
GAAATGTTGAATACTCATACTCTTCTTTTTCAATATTATTGAAGCATTATCAGGGTTATTGTCTCATG  
AGCGGATACATATTTGAATGTATTTAGAAAAATAAACAATAAGGGTTCCGCGCACATTTCCCCGAAAAG  
TGCCACCTGACGTCTAAGAAACCATTTATTATCATGACATTAACCTATAAAAATAGGCGTATCACGAGGCC  
CTTTCGTCTTCAAGAATTCTGGCGAATCCTCTGACCAGCCAGAAAACGACCTTCTGTGGTGAAACCGGA  
TGCTGCAATTCAGAGCGGCAGCAAGTGGGGGACAGCAGAAGACCTGACCGCCGAGAGTGGATGTTTGAC  
ATGGTGAAGACTATCGCACCATCAGCCAGAAAACCGAATTTTGTGGGTGGGCTAACGATATCCGCCTGA  
TGCGTGAACGTGACGGACGTAACCACCGCGACATGTGTGTGCTGTTCCGCTGGGCATGCCAGGACAACCTT  
CTGGTCCGGTAACGTGCTGAGCTAACCCGTGCGTGTGACAATTTTACCTCTGGCGGTGATAATGGTTG  
CAGCTAGCAATAATTTGTTTAACTTTAAGAAGGAGGATCCAA

**FKBP12-1.1**

ATGGGCGGAGTGCAGGTGGAAACCATCTCCCCAGGAGACGGGCGCACCTTCCCCAAGCGCGGCCAGACCT  
GCGTGGTGCACATTACCGGGATGCTTGAAGATGGAAAGAAATTTATTTCTCCTCCCGGGACAGAAACAAGCC  
CTTTAAGTTTATGCTAGGCAAGCAGCGTGTGCTGCGAGGCTGGGAAGAAGGGGTGCCCAGATGAGTGTG  
GGTCAGAGAGCCAAACTGACTATATCTCCAGATTATGCCTTTGGTGCCACTGGGCACCCAGGCATCATCC  
CACCACATGCCACTCTCGTCTTCGATGTGGAGCTTCTAAAAGTGGAA

**FRB-1.1**

ATGGGTGTGGCCATCCTCTGGCATGAGATGTGGCATGAAGGCGCGGAAGAGGCAGCGCCTTTGTACCGTG  
GGGAAAGGAACGTGAAAGGCATGTTTGAAGTGTGGAGCCCTTGCATGCTATGATGGAACGGGGCCCCCA  
GACTCTGAAGGAAACATCCTTTAATCAGGCCTATGGTTCGAGATTTAATGGAGGCCAAGAGTGGTGCAGG  
AAGTACATGAAATCAGGGAATGTCAAGGACCTCTGGCAAGCCATGCTGCTCTATGCGCATGTGCGTGATC  
GAATCTCA

**RapF-1.1**

ATGGGCAGCAGCAGCAGCATTGGCGAAAAGATTAACGAATGGTATATGTACATACGCCGATTCAGCATA  
CCGATGCAGCGTATTTGGCGTTTGAAATCGCGCAAGAGCTGGATCAAATGGAAGAAGATCAAGACCTTCA  
TTTGTACTATTCACTGATGCTGTTTCGGGCGTATCTAATGGCCGAGTACCTTGAACCGTTAGAAAAAATG  
AGGATTGAGGAACAGCCGAGACTGTCTGATCTGCTGCTTGAGATTGATAAAAAA

**RapF-1.2**

ATGGGCAGCAGCAGCAGCATTGGCGAAAAGATTAACGAATGGTATATGTACATACGCCGATTCAGCGTGC  
CCGATGCAGCGTATTTGGGCTTTGAAATCAGCCAAGAGCTGGATCAAATGGAAGAAGATCAAGACCTTCA  
TTTGTACTATTCACTGATGCTGTTTCGGGCGTATCTAATGCGTGAGTACCTTGAACCGTTAGAAAAAATG  
AGGATTGAGGAACAGCCGAGACTGTCTGATCTGCTGCTTGAGATTGATAAAAAA

**RapF-1.3**

ATGGGCAGCAGCAGCAGCATTGGCGAAAAGATTAACGAATGGTATATGTACATACGCCGATTCAGCGTGC  
CCGCGGCAGCGTATTTGGGCTTTGAAATCAGCCAAGAGCTGGATCAAATGGAAGAAGATCAAGACCTTCA  
TTTGTACTATTCACTGATGCTGTTTCGGGCGTATCTAATGCGTGAGTACCTTGAACCGTTAGAAAAAATG  
AGGATTGAGGAACAGCCGAGACTGTCTGATCTGCTGCTTGAGATTGATAAAAAA

**RapF-1.4**

ATGGGCAGCAGCAGCAGCATTGGCGAAAAGATTAACGAATTTTATATGTACATACGCCGATTCAGCATA  
CCGATGCAGCGTATTTGGGCTTTGAAATCGCGCAAGAGCTGGATCAAATGGAAGAAGATCAAGACCTTCA  
TTTGTACTATTCACTGATGCTGTTTCGGGCGTATCTAATGGCCGAGTACCTTGAACCGTTAGAAAAAATG  
AGGATTGAGGAACAGCCGAGACTGTCTGATCTGCTGCTTGAGATTGATAAAAAA

**ComA-1.1**

ATGGGTTCCTCTCAAAAAGAACAAGATGTGCTCACACCTAGAGAAATGCCTGATTCTTCAAGAAGTTGAAA  
AGGGATTTACAAACCAAGAAATCGCAGATGCCCTTCATTTACGTAAGAGCGCGATTGAAGCGAGCTTGAC  
ATCGATTTTCAATAAGCTGAATGTGCGTTTACGGACGGAAGCGGTTTTGATTGCGAAATCAGACGGTGTA  
CTT

**ComA-1.2**

ATGGGTTCCCTCTCAAAAAGAACAAGATGTGCTCACACCTAGAGAATGCCTGATTCTTCAAGAAGTTGAAA  
AGGGATTTACAAACCAAGAAATCGCAGATGCCCTTCACATGCGTAAGAGCGCGATTGAAGCGAGCTTGAC  
ATCGATTTTCAATAAGCTGAATGTCGGTTCACGGACGGAAGCGGTTTTGATTGCGAAATCAGACGGTGTA  
CTT

**ComA-1.3**

ATGGGTTCCCTCTCAAAAAGAACAAGATGTGCTCACACCTAGAGAATGCCTGATTCTTCAAGAAGTTGAAA  
AGGGATTTACAAACCAAGAAATCGCAGATGCCCTTCACATGCGTAAGAGCGCGATTGAAGCGAGCTTGAC  
ATCGATTTTTCGCGAAGCTGAATGTCGGTTCACGGACGGAAGCGGTTTTGATTGCGAAATCAGACGGTGTA  
CTT

**ComA-1.4**

ATGGGTTCCCTCTCAAAAAGAACAAGATGTGCTCACACCTAGAGAATGCCTGATTCTTCAAGAAGTTGAAA  
AGGGATTTACAAACCAAGAAATCGCAGATGCCCTTCATTTACGTAAGAGCGCGATTGAAATGAGCTTGAC  
ATCGATTTTCAATAAGCTGAATGTCGGTTCACGGACGGAAGCGGTTTTGATTGCGAAATCAGACGGTGTA  
CTT

**AR-1.1**

SDLGRKLLAARAGQDDEVRI LMANGADVNAADNTGTTPLHLAAYS GHLEIVEVLLKHGADV DSDVFGF  
TPLI LAALWGHLEIVEVLLKNGADV NAMGSDGWTPLHAAAYFGYLEIVEVLLKHGADV NAQDKRGKTAFD  
I SIDNGNEDLAEILQKLN

**AR-1.2**

SDLGRKLLAARAGQDDEVRI LMANGADVNAADNTGTTPLHLAAYS GHLEIVEVLLKHGADV DSDVFGF  
TPLI LAALWGHLEIVEVLLKNGADV NAMGSDGWTPLHAAAYFGYLEIVEVLLKHGADV NAQDKRGKTAFD  
V SIDNGNEDLAEILQKLN

**AR-1.3**

SDLGRKLLAARAGQDDEVRI LMANGADVNAADNTGTTPLHLAAYS GHLEIVEVLLKHGADV DSDVFGF  
TPLL LAALWGHLEIVEVLLKNGADV NAMGSDGWTPLHAAAWFGYLEIVEVLLKHGADV NAQDKRGKTAFD  
E SIDNGNEDLAEILQKLN

**AR-1.4**

SDLGRKLLAARAGQDDEVRI LMANGADVNAADNTGTTPLHLAAYS GHLEIVEVLLKHGADV DSDVFGM  
TPLF LAALWGHLEIVEVLLKNGADV NAMTSDGWTPLHAAAYFGYLEIVEVLLKHGADV NAQDKRGKTAFD  
V SIDNGNEDLAEILQKLN

**AR-2.5**

SDLGRKLLAARAGQDDEVRI LMANGADVNAADNTGTTPLHLAAYS GHLEIVEVLLKHGADV DSDVFGF  
TPLL LAALWGHLEIVEVLLKHGEDV NAMGSDGWTPLHAAAWFGYLEIVEVLLKHGADV NAQDKRGKTAFD  
E SIDNGNEDLAEILQKLN

**AR-2.6**

SDLGRKLLAARAGQDDEVRIILMANGADVNAADNTGTTPLHLAAAYSGHLEIVEVLLKHGADVVDASDVFGF  
TPLGLAALWGHLEIVEVLLKHGEDVNAMGSDGWTPHAAAWFGYLEIVEVLLKHGADVNAQDKRGKTAFD  
ESIDNGNEDLAEILQKLN

**AR-2.7**

SDLGRKLLAARAGQDDEVRIILMANGADVNAADNTGTTPLHLAAAYSGHLEIVEVLLKHGADVVDASDVFGF  
TPLGLAALWGHLEIVEVLLKHGEDVNAMGSDGWTPHAAAKFGYLEIVEVLLKHGADVNAQDKRGKTPFD  
LAIDNGNEDIAEVLQKAA

**AR-3.8**

SDLGRKLLAARAGQDDEVRIILMANGADVNAADNTGTTPLHLAAAYSGHLEIVEVLLKHGADVVDASDVFGF  
TPLGLAALWGHLEIVEVLLKHGEDVNAMGSDGWTPHAAAKFGYLEIVEVLLKHGADVNAQDKKGLTPFD  
LAILNGNEDIAEVLQKAA

**MBP-1.1**

KIEEGKLVIIWINGDKGYNGLAEVGGKFEKDTGIKVTVEHPDKLEEKFPQVAATGDGPDIIFWAHDRFGGY  
AQSGLLAEITPDKAFQDKLYPFTWDVRYNGKLIAYPIAVEALS LIYNKDLLPNPPKTWEEIFALDKELK  
AKGKSALMFNLQEPYFTWPLIAADGGYAFKYENKDYDIKDVGVNAGAKAGLTFVLVALIAAKAMNADTDY  
SIAEAAFNKGETAMTINGPWAWSNIDTSKVN YGVTVLPTFKGQPSKPFVGVLSAGINAASPNKELAKEFL  
ENYLLTDEGLEAVNKDKPLGAVALKS YEEELAKDPRIAATMENAQKGEIMPNI PQMSAFWYAVRTAVINA  
ASG

**MBP-1.2**

KIEEGKLVIIWINGDKGYNGLAEVGGKFEKDTGIKVTVEHPDKLEEKFPQVAATGDGPDIIFWAHDRFGGY  
AQSGLLAEITPDKAFQDKLYPFTWDVRYNGKLIAYPIAVEALS LIYNKDLLPNPPKTWEEIFALDKELK  
AKGKSALMFNLQEPYFTWPLIAADGGYAFKYENKDYDIKDVGVNAGAKAGLTFVLVALIAKAKHMNADTDY  
SIAEAAFNKGETAMTINGPWAWSNIDTSKVN YGVTVLPTFKGQPSKPFVGVLSAGINAASPNKELAKEFL  
ENYLLTDEGLEAVNKDKPLGAVALKS YEEELAKDPRIAATMENAQKGEIMPNI PQMSAFWYAVRTAVINA  
ASG

**MBP-1.3**

KIEEGKLVIIWINGDKGYNGLAEVGGKFEKDTGIKVTVEHPDKLEEKFPQVAATGDGPDIIFWAHDRFGGY  
AQSGLLAEITPDKAFQDKLYPFTWDVRYNGKLIAYPIAVEALS LIYNKDLLPNPPKTWEEIFALDKELK  
AKGKSALMFNLQEPYFTWPLIAADGGYAFKYENKDYDIKDVGVNAGAKAGLTRLVYLIAAKAMNADTDY  
SIAEAAFNKGETAMTINGPWAWSNIDTSKVN YGVTVLPTFKGQPSKPFVGVLSAGINAASPNKELAKEFL  
ENYLLTDEGLEAVNKDKPLGAVALKS YEEELAKDPRIAATMENAQKGEIMPNI PQMSAFWYAVRTAVINA  
ASG

**MBP-1.4**

KIEEGKLVIIWINGDKGYNGLAEVGGKFEKDTGIKVTVEHPDKLEEKFPQVAATGDGPDIIFWAHDRFGGY  
AQSGLLAEITPDKAFQDKLYPFTWDVRYNGKLIAYPIAVEALS LIYNKDLLPNPPKTWEEIFALDKELK  
AKGKSALMFNLQEPYFTWPLIAADGGYAFKYENKDYDIKDVGVNAGAKAGLTFVLVALIAKAKAMNADTDY  
SIAEAAFNKGETAMTINGPWAWSNIDTSKVN YGVTVLPTFKGQPSKPFVGVLSAGINAASPNKELAKEFL  
ENYLLTDEGLEAVNKDKPLGAVALKS YEEELAKDPRIAATMENAQKGEIMPNI PQMSAFWYAVRTAVINA  
ASG

**MBP-2.5**

KIEEGKLVIIWINGDKGYNGLAEVGGKFEKDTGIKVTVEHPDKLEEKFPQVAATGDGPDIIFWAHDFRGGY  
AQSGLLAEITPDKAFQDKLYPFTWDAVRYNGKLIAYPIAVEALS LIYNKDLLPNPKTWEEIFALDKELK  
AKGKSALMFNLQEPYFTWPLIAADGGYAFKYENKDYDIKDVGVNDAGAKAGLTALVYLIAAKAMNADTDY  
SIAEAAFNKGETAMTINGPWAWSNIDTSKVN YGVTVLPTFKGQPSKPFVGVLSAGINAASPNKELAKEFL  
ENYLLTDEGLEAVNKDKPLGAVALKSYEEELAKDPRIAATMENAQKGEIMPNI PQMSAFWYAVRTAVINA  
ASGRQTVDEALKDAQTRITK

**MBP-3.6**

KIEEGKLVIIWINGDKGYNGLAEVGGKFEKDTGIKVTVEHPDKLEEKFPQVAATGDGPDIIFWAHDFRGGY  
AQSGLLAEITPDKAFQDKLYPFTWDAVRYNGKLIAYPIAVEALS LIYNKDLLPNPKTWEEIFALDKELK  
AKGKSALMFNLQEPYFTWPLIAADGGYAFKYENKDYDIKDVGVNDAGAKAGLTALVALIAAKAMNADTDY  
SIAEAAFNKGETAMTINGPWAWSNIDTSKVN YGVTVLPTFKGQPSKPFVGVLSAGINAASPNKELAKEFL  
ENYLLTDEGLEAVNKDKPLGAVALKSYEEELAKDPRIAATMENAQKGEIMPNI PQMSAFWYAVRTAVINA  
ASGRQTVDEALKDAQTRITK

**ERG12**

ATGTCATTACCGTTCTTAACCTTCTGCACCGGGAAAAGGTTATTATTTTTGGTGAACACTCTGCTGTGTACA  
ACAAGCCTGCCGTCGCTGCTAGTGTGTCTGCGTTGAGAACCTACCTGCTAATAAGCGAGTCATCTGCACC  
AGATACTATTGAATTGGACTTCCCGGACATTAGCTTTAATCATAAGTGGTCCATCAATGATTTCAATGCC  
ATCACCGAGGATCAAGTAAACTCCCAAAAATTGGCCAAGGCTCAACAAGCCACCGATGGCTTGTCTCAGG  
AACTCGTTAGTCTTTTGGACCCGTTGTTAGCTCAACTATCCGAATCCGCCCACTACCATGCAGCGTTTTG  
TTTCTGTATATGTTTGTGTTGCCTATGCCCCATGCCAAGAATATTAAGTTTTCTTTAAAGTCTACTTTA  
CCCATCGGTGCTGGGTTGGGCTCAAGCGCCTCTATTTCTGTATCACTGGCCTTAGCTATGGCCTACTTGG  
GGGGTTAATAGGATCTAATGACTTGGAAAAGCTGTCAGAAAACGATAAGCATATAGTGAATCAATGGGC  
CTTCATAGGTGAAAAGTGTGCTCACGGTACCCCTCAGGAATAGATAACGCTGTGGCCACTTATGGTAAT  
GCCCTGCTATTTGAAAAGACTCACATAATGGAACAATAAACACAAACAATTTTAAGTTCTTAGATGATT  
TCCCAGCCATTCCAATGATCCTAACCTATACTAGAATCCCAAGGCTACAAAAGACCTTGTTGCTCGCGT  
TCGTGTGTTGGTCACCGAGAAATTTCTGAAGTTATGAAGCCAATTTCTAGATGCCATGGGTGAATGTGCC  
CTACAAGGCTTAGAGATCATGACTAAGTTAAGTAAATGTAAAGGCACCGATGACGAGGCTGTAGAACTA  
ATAATGAACTGTATGAACAATTTGGAATTGATAAGAATAAATCATGGACTGCTTGTCTCAATCGGTGT  
TTCTCATCCTGGATTAGAACTTATTAATAAATCTGAGCGATGATTTGAGAATTGGCTCCACAAAACCTTACC  
GGTGCTGGTGGCGCGGTTGCTCTTTGACTTTGTTACGAAGAGACATTA CTCAAGAGCAAATTTGACAGCT  
TCAAAAAGAAATTCGAAGATGATTTTAGTTACGAGACATTTGAAACAGACTTGGGTGGGACTGGCTGCTG  
TTTGTTAAGCGCAAAAATTTGAATAAAGACCTTAAAATCAAATCCCTAGTATTCCAATTTTGA  
AAAATACCACAAAGCAACAATTTGACGATCTATTATTGCCAGGAAACACGAATTTACCATGGACTTCA

**ERG8**

ATGTCAGAGTTGAGAGCCTTCAGTGCCCCAGGGAAAAGCGTTACTAGCTGGTGGATATTTAGTTTTAGATA  
CAAAAATATGAAGCATTTGTAGTCGGATTATCGGCAAGAATGCATGCTGTAGCCATCCTTACGGTTCATT  
GCAAGGGTCTGATAAGTTTGAAGTGCCTGTGAAAAGTAAACAATTTAAAGATGGGGAGTGGCTGTACCAT  
ATAAGTCCTAAAAGTGGCTTCATTCTGTTTCGATAGGCGGATCTAAGAACCCTTTCAATTGAAAAAGTTA  
TCGCTAACGTATTTAGCTACTTTAAACCTAACATGGACGACTACTGCAATAGAAACTTGTTTCGTTATTGA  
TATTTTCTCTGATGATGCCTACCATTCTCAGGAGGATAGCGTTACCGAACATCGTGGCAACAGAAGATTG  
AGTTTTCAATTCGCACAGAATTGAAGAAGTTCCCAAAACAGGGCTGGGCTCCTCGGCAGGTTTAGTCACAG  
TTTTAACTACAGCTTTGGCCTCCTTTTTGTATCGGACCTGGAAAATAATGTAGACAAATATAGAGAAGT  
TATTCATAATTTAGCACAAGTTGCTCATTGTCAAGCTCAGGGTAAAATTTGGAAGCGGGTTTGTAGTAGCG  
GCGGCAGCATATGGATCTATCAGATATAGAAGATTTCCACCCGCATTAATCTCTAATTTGCCAGATATTG  
GAAGTGCTACTTACGGCAGTAAACTGGCGCATTGTTGTTGATGAAGAAGACTGGAATATTACGATTTAAAG



TAACCATTTACCTTCGGGATTAAC TTTATGGATGGGCGATATTAAGAATGGTTCAGAAACAGTAAACTG  
GTCCAGAAGGTAAAAAATTGGTATGATTTCGCATATGCCAGAAAGCTTGAAAATATATACAGAACTCGATC  
ATGCAAATTTCTAGATTTATGGATGGACTATCTAACTAGATCGCTTACACGAGACTCATGACGATTACAG  
CGATCAGATATTTGAGTCTCTTGAGAGGAATGACTGTACCTGTCAAAGTATCCTGAAATCACAGAAGTT  
AGAGATGCAGTTGCCACAATTAGACGTTCCCTTTAGAAAAATAACTAAAGAATCTGGTGCCGATATCGAAC  
CTCCCGTACAACTAGCTTATTGGATGATTGCCAGACCTTAAAAGGAGTTCTTACTTGCTTAATACCTGG  
TGCTGGTGGTTATGACGCCATTGCAGTGATTACTAAGCAAGATGTTGATCTTAGGGCTCAAACCGCTAAT  
GACAAAAGATTTTCTAAGGTTCAATGGCTGGATGTA ACTCAGGCTGACTGGGGTGT TAGGAAAGAAAAAG  
ATCCGAAACTTATCTTGATAAA

**MVD1**

ATGACCGTTTACACAGCATCCGTTACCGCACCCGTCAACATCGCAACCCTTAAGTATTGGGGGAAAAGGG  
ACACGAAGTTGAATCTGCCACCAATTCGTCCATATCAGTGACTTTATCGCAAGATGACCTCAGAACGTT  
GACCTCTGCGGCTACTGCACCTGAGTTTGAACGCGACACTTTGTGGTTAAATGGAGAACCACACAGCATC  
GACAATGAAAGAACTCAAATTTGTCTGCGCGACCTACGCCAATTAAGAAAGGAAAATGGAATCGAAGGACG  
CCTCATTTGCCACATTTATCTCAATGGAAACTCCACATTTGTCTCCGAAAATAACTTTCCCTACAGCAGCTGG  
TTTAGCTTCCCTCCGCTGCTGGCTTTGCTGCATTTGGTCTCTGCAATTGCTAAGTTAATACCAATTACCACAG  
TCAACTTCAGAAATATCTAGAATAGCAAGAAAGGGTCTGGTTT CAGCTTG TAGATCGTTGTTTGGCGGAT  
ACGTGGCCTGGGAAAATGGGAAAAGCTGAAGATGGTCATGATTCCATGGCAGTACAAATCGCAGACAGCTC  
TGACTGGCCTCAGATGAAAGCTTGTGTCTTAGTTGTCAGCGATATTA AAAAGGATGTGAGTTCCACTCAG  
GGTATGCAATTGACCGTGGCAACCTCCGAACTATTTAAAGAAAGAATTGAACATGTCGTACCAAAGAGAT  
TTGAAGTCATGCGTAAAGCCATTGTTGAAAAGATTTCCGCCACCTTTGCAAAGGAAACAATGATGGATT C  
CAACTCTTTCCATGCCACATGTTTGGACTCTTTCCCTCCAATATTTCTACATGAATGACACTTCCAAGCGT  
ATCATCAGTTGGTGCCACACCATTAATCAGTTTTACGGAGAAACAATCGTTGCATACACGTTTGATGCAG  
GTCCAAATGCTGTGTTGTACTACTTAGCTGAAAATGAGTCGAAACTCTTTGCATTTATCTATAAATTTGTT  
TGGCTCTGTTCCCTGGATGGGACAAGAAATTTACTACTGAGCAGCTTGAGGCTTTCAACCATCAATTTGAA  
TCATCTAACTTTACTGCACGTGAATTTGGATCTTGAGTTGCAAAGGATGTTGCCAGAGTGATTTTA ACTC  
AAGTCGGTTT CAGGCCACAAGAAACAACGAATCTTTGATTGACGCAAAGACTGGTCTACCAAAGGAA

**idi**

ATGATAATGCAAACGGAACACGTCATTTTTATTGAATGCACAGGGAGTTCCCACGGGTACGCTGGAAAAGT  
ATGCCGCACACACGGCAGACACCCGCTTACATCTCGCGTTCTCCAGTTGGCTGTTTAAATGCCAAAGGACA  
ATTATTAGTTACCCGCCGCGCACTGAGCAAAAAAGCATGGCCTGGCGTGTGGACTAACTCGGTTTGTGGG  
CACCCACA ACTGGGAGAAAGCAACGAAGACGCAGTGATCCGCCGTTGCCGTTATGAGCTTGGCGTGGAAA  
TTACGCCTCCTGAATCTATCTATCCTGACTTTCGCTACCGCGCCACCGATCCGAGTGGCATTGTGGAAAA  
TGAAGTGTGTCCGGTATTTGCCGCACGCACCACTAGTGC GTTACAGATCAATGATGATGAAGTATGGAT  
TATCAATGGTGTGATTTAGCAGATGTATTACACGGTATTGATGCCACGCCGTGGGCGTT CAGTCCGTGGA  
TGGTGTATGCAGGCGACAAATCGCGAAGCCAGAAAACGATTATCTGCATTTACCCAGCTTAAA

**ispA**

ATGGACTTTCCGCAGCAACTCGAAGCCTGCGTTAAGCAGGCCAACCCAGGCGCTGAGCCGTTTTTATCGCCC  
CACTGCCCTTTTCAGAACACTCCCGTGGTTCGAAACCATGCAGTATGGCGCATTATTAGGTGGTAAGCGCCT  
GCGACCTTTCCCTGGTTTTATGCCACCGGTCATATGTTCCGGCGTTAGCACAAACACGCTGGACGCACCCGCT  
GCCGCCGTTGAGTGTATCCACGCTTACTCATTAAATTCATGATGATTTACCGGCAATGGATGATGACGATC  
TGCGTCCGGTTTTGCCAACCTGCCATGTGAAGTTTGGCGAAGCAAACGCGATTCTCGCTGGCGACGCTTT  
ACAAACGCTGGCGTTCTCGATTTTAAGCGATGCCGATATGCCGGAAGTGTCCGACCGCGACAGAATTTTCG  
ATGATTTCTGAACTGGCGAGCGCCAGTGGTATTGCCGGAATGTGCGGTGGTCAGGCATTAGATTTAGACG  
CGGAAGGCAAACACGTACCTCTGGACGCGCTTGAGCGTATTCATCGTCATAAAAACCGGCGCATTGATTTCG  
CGCCGCCGTTTCGCTTGGTGCATTAAGCGCCGGAGATAAAGGACGTCGTGCTCTGCCGGTACTCGACAAG

TATGCAGAGAGCATCGGCCTTGCCCTCCAGGTTCCAGGATGACATCCTGGATGTGGTGGGAGATACTGCAA  
CGTTGGGAAAACGCCAGGGTGCCGACCAGCAACTTGGTAAAAGTACCTACCCTGCACTTCTGGGCCTTGA  
GCAAGCCCGGAAGAAAGCCCGGGATCTGATCGACGATGCCCGTCAGTCGCTGAAAACAACTGGCTGAACAG  
TCACTCGATACCTCGGCACTGGAAGCGCTAGCGGACTACATCATCCAGCGTAATAAA

**ADS**

ATGGCCCTGACCGAAGAGAAACCGATCCGCCCGATCGCTAACTTCCCGCCGTCTATCTGGGGTGACCAGT  
TCCTGATCTACGAAAAGCAGGTTGAGCAGGGTGTGTAACAGATCGTAAACGACCTGAAGAAAAGATTTCG  
TCAGCTGCTGAAAAGAAGCTCTGGACATCCCGATGAAACACGCTAACCTGCTGAAACTGATCGACGAGATC  
CAGCGTCTGGGTATCCCGTACCACTTCGAACCGGAAATCGACCACGCACTGCAGTGCATCTACGAAACCT  
ACGGCGACAACCTGGAACGGCGACCGTTCTTCTCTGTGGTTTCGTCTGATGCGTAAACAGGGCTACTACGT  
TACCTGTGACGTTTTTAACAACCTACAAGGACAAGAACGGTGTCTTCAAACAGTCTCTGGCTAACGACGTT  
GAAGGCCTGCTGGAACGTGTACGAAGCGACCTCCATGCGTGTACCGGGTGAATCATCCTGGAGGACGCGC  
TGGGTTTCACCCGTTCTCGTCTGTCCATTATGACTAAAGACGCTTCTCTACTAACCCGGCTCTGTTTAC  
CGAAATCCAGCGTGTCTGAAACAGCCGCTGTGGAAACGCTGTCCGCGTATCGAAGCAGCACAGTACATT  
CCGTTTTACCAGCAGCAGGACTCTCACAACAAGACCCTGCTGAAACTGGCTAAGCTGGAGTTCAACCTGC  
TGCAGTCTCTGCACAAAGAAGAACTGTCTCACGTTTGTAAAGTGGTGGAAAGGCATTTGACATCAAGAAAA  
CGCGCCGTGCCTGCGTGACCGTATCGTTGAATGTTACTTCTGGGGTCTGGGTTCTGGTTATGAACCACAG  
TACTCCCGTGCACGTGTGTTCTTCACTAAAGCTGTAGCTGTTATCACCCCTGATCGATGACACTTACGATG  
CTTACGGCACCTACGAAGAAGTGAAGATTTTTACTGAAGCTGTAGAACGCTGGTCTATCACTTGCCTGGA  
CACTCTGCCGGAGTACATGAAACCGATCTACAAACTGTTTTCATGGATACCTACACCGAAATGGAGGAGTTC  
CTGGCAAAGAAGGCCGTACCGACCTGTTCAACTGCGGTAAAGAGTTTGTAAAGAGTTCGTACGTAACC  
TGATGGTTGAAGCTAAATGGGCTAACGAAGGCCATATCCCGACTACCGAAGAACATGACCCGGTTGTTAT  
CATCACCGCGGGTCAAACCTGCTGACCACCACTTGCTATCTGGGTATGTCCGACATCTTTACCAAGGAA  
TCTGTTGAATGGGCTGTTTCTGCACCGCCGCTGTTCCGTTACTCCGGTATTCTGGGTCGTCTGTAACG  
ACCTGATGACCCACAAAGCAGAGCAGGAACGTAAACACTCTTCCCTCTCTGGAATCCTACATGAAGGA  
ATATAACGTTAACGAGGAGTACGCACAGACTCTGATCTATAAAGAAGTTGAAGACGTATGGAAAGACATC  
AACCGTGAATACCTGACTACTAAAAACATCCCGCGCCCGCTGCTGATGGCAGTAATCTACCTGTGCCAGT  
TCCTGGAAGTACAGTACGCTGGTAAAGATAACTTCACTCGCATGGGCGACGAATACAAACACCTGATCAA  
ATCCCTGCTGGTTTACCCGATGTCCATC

**nDHER**

ATGGTTTCGACCATTGAACTGCATCGTTCGCCGTGCCAAAATATGGGGATTGGCAAGAACGGAGACCTAC  
CCTGGCCTCCGCTCAGGAACGAGTTCAGTACTTCCAAGAATGACCACAACCTCTTTCAGTGGAAAGGTAA  
ACAGAATCTGGTGATTATGGGTAGGAAAACCTGGTTCTCCATTCTGAGAAGAATCGACCTTTAAAGGAC  
AGAATTAATATAGTCTCAGTAGAGAACTCAAAGAACCACCACGAGGAGCTCATTTTCTTGCCAAAAGTT  
TGGATGATGCCTTAAGACTTATTGAACAACCCGAATTGGGTACC

**cDHER**

ATGAGTAAAGTAGACATGGTTTTGGATAGTCGGAGGCAGTTCTGTTTACCAGGAAGCCATGAATCAACCAG  
GCCACCTCAGACTCTTTGTGACAAGGATCATGCAGGAATTTGAAAGTGACACGTTTTTCCCAGAAATTGA  
TTTTGGGAAAATATAAACTTCTCCCAGAATACCCAGGCGTCTCTCTGAGGTCCAGGAGGAAAAAGGCATC  
AAGTATAAGTTTGAAGTCTACGAGAAGAAAGAC

**nDHER fusion linker**

GGGAGCAGTGCTAGCGGAACCTTAGCACTAGTTCCGGAATT

**cDHER fusion linker**

GGTGGCTCTGGCAGTGGAGCTAGCACT

**LgBIT**

ATGGTCTTCACACTCGAAGATTTTCGTTGGGGACTGGGAACAGACAGCCGCCTACAACCTGGACCAAGTCC  
TTGAACAGGGAGGTGTGTCCAGTTTGCTGCAGAAATCTCGCCGTGTCCGTAACCTCCGATCCAAAGGATTGT  
CCGGAGCGGTGAAAAATGCCCTGAAGATCGACATCCATGTCATCATCCCGTATGAAGGTCTGAGCGCCGAC  
CAAATGGCCAGATCGAAGAGGTGTTTAAGGTGGTGTACCCTGTGGATGATCATCACTTTAAGGTGATCC  
TGCCCTATGGCACACTGGTAATCGACGGGGTTACGCCGAACATGCTGAACTATTTCCGACGGCCGTATGA  
AGGCATCGCCGTGTTTCGACGGCAAAAAGATCACTGTAACAGGGACCCTGTGGAACGGCAACAAAATTATC  
GACGAGCGCCTGATCACCCCGACGGCTCCATGCTGTTCCGAGTAACCATCAACAGC

**SmBIT**

ATGGTGACCGGCTACCGGCTGTTTCGAGGAGATTCTG

**LgBIT and ddFP fusion linker**

GGTAGCGGCAGCGGCAG

**SmBIT fusion linker**

GGTAGCGGCAGCGGCAGGGTAGCGGCTTCT

**ddRFPb**

ATGGTGAGCAAGGGCGAGGAGACCATCAAAGAGTTCATGCGCTTCAAGGTGCGCATGGAGGGCTCCATGA  
ACGGCCACGAGTTCGAGATCGAGGGCGAGGGCGAGGGCCGCCCTACGAGGGCACCCAGACCGCCAAGCT  
GAAGGTGACCAAGGGCGGCCCCCTGCCCTTCGCCTGGGACATCCTGTCCCCCAGTTCATGTACGGCTCC  
GAGGCGTACGTGAGGCACCCCGCCGACATCCCCGATTACAAGAAGCTGCCCTTCCCCGAGGGCTTCAAGT  
GGGAGCGCGTGATGAACTTCGAAGACGGCGGTCTGGTGACCGTTACCCAGGACTCCTCCCTGCAGGACGG  
CACGCTGATCTGCAAGGTGAAGATGCGCGGCACCAACTTCCCCCGACGGCCCCGTAATGCAGAAGAAG  
ACCATGGGCTGGGAGGCCTCCACCGAGATGCTGTACCCGAAGACGGCGTGCTGAAGGGCCATAGCTATC  
AGGCCCTGAAGCTGAAGGACGGCGGCCACTACCTGGTGGAGTTCGAGACCATCTACATGGCCAAGAAGCC  
CGTGCAACTGCCCCGCGATTACTGTGTGGACACCAAGCTGGACATCACCTCCCACAACGAGGACTACACC  
ATCGTGGAACAGTACGGGCGCTCCGAGGGCCGCCACCCTCTGGGCATGGACGAGCGGTACAAG

**ddGFPa**

ATGGCGAGCAAGAGCGAGGAGGTCATCAAAGAGTTCATGCGCTTCAAGGTGCGCTTGGAGGGCTCCATGA  
ACGGCCACGAGTTCGAGATCGAGGGCGAGGGCGAGGGCCGCCCTACGAGGGCACCCAGACCGCCAAGCT  
GAAGGTGACCAAGGGCGGCCCCCTGCCCTTCGCCTGGGACATCCTGTCCCCCTGATCATGTACGGCTCC  
AAGATGTACGTGAAGCACCCCGCCGACGTCCCCGATTACATGAAGCTGTCTTCCCCGAGGGCTTCAAGT  
GGGAGCGCGTGATGCACTTCGAGGACGGCGGTCTGGTGACCGCGACACAGGACTCCTCCCTGCAGGACGG  
CACGCTGATCTACAAGGTGAAGATGCGCGGCACCAACTTCCCCCGACGGCCCCGTAATGCAGAAGAAG  
ACCTTGGGCTGGGATTATGCCACCGAGCGCCTGTACCCGAAGAAGGCGTGCTGAAGGGCGAGCTCCTGG  
GGCGCCTGAAGCTGAAGGACGGCGGCCCTCAACCTGGTGGAGTCCAAGACCATCTACATGGCCAAGAAGCC  
CGTGCAACTGCCCCGCTACTACTTCGTGGACACCAAGCTGGACATCACCTCCCACAACGAGGACTACACC  
ATCGTGGAACAGTACGAGCGCTCCGAGGGCCGCCACCACCTGGGGCATGGTACAGGTAGCACAGGCAGC

## T7 RNA polymerase

ATGAACACGATTAACATCGCTAAGAACGACTTCTCTGACATCGAACTGGCTGCTATCCCGTTCAACACTC  
TGGCTGACCATTACGGTGAGCGTTTAGCTCGCGAACAGTTGGCCCTTGAGCATGAGTCTTACGAGATGGG  
TGAAGCACGCTTCCGCAAGATGTTTGAAGCGTCAACTTAAAGCTGGTGAGGTTGCGGATAACGCTGCCGCC  
AAGCCTCTCATCACTACCCTACTCCCTAAGATGATTGCACGCATCAACGACTGGTTTGAAGGAAGTAAAG  
CTAAGCGCGGCAAGCGCCGACAGCCTTCCAGTTCCCTGCAAGAAATCAAGCCGGAAGCCGTAGCGTACAT  
CACCATTAAGACCACTCTGGCTTGCCTAACAGTGCTGACAATACAACCGTTTCCAGGCTGTAGCAAGCGCA  
ATCGGTGCGGCCATTGAGGACGAGGCTCGCTTCGGTCGTATCCGTGACCTTGAAGCTAAGCACTTCAAGA  
AAAACGTTGAGGAACAACCTCAACAAGCGCGTAGGGCACGTCTACAAGAAAGCATTATGCAAGTTGTGCA  
GGCTGACATGCTCTCTAAGGGTCTACTCGGTGGCGAGGCGTGGTCTTCGTGGCATAAGGAAGACTCTATT  
CATGTAGGAGTACGCTGCATCGAGATGCTCATTGAGTCAACCGGAATGGTTAGCTTACACCGCCAAAATG  
CTGGCGTAGTAGGTCAAGACTCTGAGACTATCGAACTCGCACCTGAATACGCTGAGGCTATCGCAACCCG  
TGCAGGTGCGCTGGCTGGCATCTCTCCGATGTTCCAACCTTGGCTAGTTCCTCCTAAGCCGTGGACTGGC  
ATTACTGGTGGTGGCTATTGGGCTAACGGTCGTCGTCCTCTGGCGCTGGTGCCTACTCACAGTAAGAAAG  
CACTGATGCGCTACGAAGACGTTTACATGCCTGAGGTGTACAAAGCGATTAACATTGCGCAAAAACACCGC  
ATGGAAAATCAACAAGAAAGTCCCTAGCGGTGCGCAACGTAATCACCAAGTGGAAGCATTGTCCGGTTCGAG  
GACATCCCTGCGATTGAGCGTGAAGAACTCCCGATGAAACCGGAAGACATCGACATGAATCCTGAGGCTC  
TCACCGCGTGGAAACGTGCTGCCGCTGCTGTGTACCGCAAGGACAAGGCTCGCAAGTCTCGCCGTATCAG  
CCTTGAGTTTTCATGCTTGAAGCAAGCCAATAAGTTTGGCTAACCATTAAGGCCATCTGGTTCCCTTACAACATG  
GACTGGCGCGGTGCTGTTTTACGCTGTGTCAATGTTCAACCCGCAAGGTAACGATATGACCAAAGGACTGC  
TTACGCTGGCGAAAGGTAAACCAATCGGTAAGGAAGGTTACTACTGGCTGAAAATCCACGGTGCAAACTG  
TGCGGGTGTGATAAGGTTCCGTTCCCTGAGCGCATCAAGTTCATTGAGGAAAACCACGAGAACATCATG  
GCTTGCCTAAGTCTCCACTGGAGAACACTTGGTGGGCTGAGCAAGATTCTCCGTTCTGCTTCCCTGCGT  
TCTGCTTTGAGTACGCTGGGGTACAGCACCACGGCCTGAGCTATAACTGCTCCCTTCCGCTGGCGTTTGA  
CGGGTCTTGCTCTGGCATCCAGCACTTCTCCGCGATGCTCCGAGATGAGGTAGGTGGTTCGCGCGGTTAAC  
TTGCTTCCCTAGTGAAACCGTTTCCAGGACATCTACGGGATTGTTGCTAAGAAAGTCAACGAGATTCTACAAG  
CAGACGCAATCAATGGGACCGATAACGAAGTAGTTACCGTGACCGATGAGAACACTGGTGAAATCTCTGA  
GAAAGTCAAGCTGGGCACTAAGGCACCTGGCTGGTCAATGGCTGGCTTACGGTGTACTCGCAGTGTGACT  
AAGCGTTCAGTCATGACGCTGGCTTACGGGTCCAAAGAGTTCCGGCTTCCGTCAACAAGTGTGGAAGATA  
CCATTCAGCCAGCTATTGATTCCGGCAAGGGTCTGATGTTCACTCAGCCGAATCAGGCTGCTGGATACAT  
GGCTAAGCTGATTTGGGAATCTGTGAGCGTGACGGTGGTAGCTGCGGTTGAAGCAATGAACTGGCTTAAAG  
TCTGCTGCTAAGCTGCTGGCTGCTGAGGTCAAAGATAAGAAGACTGGAGAGATTCTTCGCAAGCGTTGCG  
CTGTGCATTGGGTAACCTCCTGATGGTTTTCCCTGTGTGGCAGGAATACAAGAAGCCATTTCAGACGCGCTT  
GAACCTGATGTTCCCTCGGTGAGTTCCGTTACAGCCTACCATTAACACCAACAAAGATAGCGAGATTGAT  
GCACACAAACAGGAGTCTGGTATCGCTCCTAACTTTGTACACAGCCAAGACGGTAGCCACCTTCGTAAGA  
CTGTAGTGTGGGCACACGAGAAGTACGGAATCGAATCTTTTGCCTGATTACGACTCCTTCGGTACCAT  
TCCGGCTGACGCTGCGAACCTGTTCAAAGCAGTGCAGGAACTATGGTTGACACATATGAGTCTTGTGAT  
GTACTGGCTGATTTCTACGACCAGTTCGCTGACCAGTTGCACGAGTCTCAATTGGACAAAATGCCAGCAC  
TTCCGGCTAAAGGTAACCTTGAACCTCCGTGACATCTTAGAGTCGGACTTCGCGTTCGCG
